# Supplementary material for: Systematic review of infant and young child feeding practices in conflict areas: what the evidence advocates
Source: PubMed Central journal article supplement (PMC7488834; doi:10.1136/bmjopen-2020-036757), 2020-09-13
Supplement: bmjopen-2020-036757.draft_revisions.pdf [file bmjopen-2020-036757.draft_revisions.pdf]

# BMJ Open

BMJ Open is committed to open peer review. As part of this commitment we make the peer review history of every article we publish publicly available.

When an article is published we post the peer reviewers' comments and the authors' responses online. We also post the versions of the paper that were used during peer review. These are the versions that the peer review comments apply to.

The versions of the paper that follow are the versions that were submitted during the peer review process. They are not the versions of record or the final published versions. They should not be cited or distributed as the published version of this manuscript.

BMJ Open is an open access journal and the full, final, typeset and author-corrected version of record of the manuscript is available on our site with no access controls, subscription charges or pay-per-view fees (<http://bmjopen.bmj.com>).

If you have any questions on BMJ Open's open peer review process please email [info.bmjopen@bmj.com](mailto:info.bmjopen@bmj.com)

# BMJ Open

## Ensuring Optimal Infant and Young Child Feeding Practices in conflict areas: What the evidence advocates

|                               |                                                                                                                                                                                                                                    |
|-------------------------------|------------------------------------------------------------------------------------------------------------------------------------------------------------------------------------------------------------------------------------|
| Journal:                      | <i>BMJ Open</i>                                                                                                                                                                                                                    |
| Manuscript ID                 | bmjopen-2020-036757                                                                                                                                                                                                                |
| Article Type:                 | Original research                                                                                                                                                                                                                  |
| Date Submitted by the Author: | 01-Jan-2020                                                                                                                                                                                                                        |
| Complete List of Authors:     | Rabbani, Amna; Aga Khan University<br>Peera, Zahra; Aga Khan University, Paediatrics<br>Siddqui, Faareha; Institute of Business Administration<br>Das, Jai K.; Aga Khan University<br>Bhutta, Zulfiqar; Hospital for Sick Children |
| Keywords:                     | PUBLIC HEALTH, Health policy < HEALTH SERVICES ADMINISTRATION & MANAGEMENT, Community child health < PAEDIATRICS                                                                                                                   |
|                               |                                                                                                                                                                                                                                    |

SCHOLARONE™  
Manuscripts

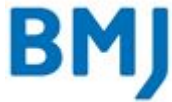

I, the Submitting Author has the right to grant and does grant on behalf of all authors of the Work (as defined in the below author licence), an exclusive licence and/or a non-exclusive licence for contributions from authors who are: i) UK Crown employees; ii) where BMJ has agreed a CC-BY licence shall apply, and/or iii) in accordance with the terms applicable for US Federal Government officers or employees acting as part of their official duties; on a worldwide, perpetual, irrevocable, royalty-free basis to BMJ Publishing Group Ltd ("BMJ") its licensees and where the relevant Journal is co-owned by BMJ to the co-owners of the Journal, to publish the Work in this journal and any other BMJ products and to exploit all rights, as set out in our [licence](#).

The Submitting Author accepts and understands that any supply made under these terms is made by BMJ to the Submitting Author unless you are acting as an employee on behalf of your employer or a postgraduate student of an affiliated institution which is paying any applicable article publishing charge ("APC") for Open Access articles. Where the Submitting Author wishes to make the Work available on an Open Access basis (and intends to pay the relevant APC), the terms of reuse of such Open Access shall be governed by a Creative Commons licence – details of these licences and which [Creative Commons](#) licence will apply to this Work are set out in our licence referred to above.

Other than as permitted in any relevant BMJ Author's Self Archiving Policies, I confirm this Work has not been accepted for publication elsewhere, is not being considered for publication elsewhere and does not duplicate material already published. I confirm all authors consent to publication of this Work and authorise the granting of this licence.

1  
2  
3  
4 1 **Ensuring Optimal Infant and Young Child Feeding Practices in conflict areas: What the evidence**  
5 2 **advocates**

6  
7  
8 3 Amna Rabbani<sup>1</sup>, Zahra Ali Padhani<sup>1</sup>, Faareha A Siddiqui<sup>2</sup>, Jai K Das<sup>1</sup>, Zulfiqar A Bhutta<sup>3,4</sup>

9  
10 4 1. Division of Women and Child Health, Aga Khan University, Karachi, Pakistan

11 5 2. Institute of Business Administration, Karachi, Pakistan

12 6 3. Center of Excellence in Women and Child Health, Aga Khan University, Karachi, Pakistan

13 7 4. Centre for Global Child Health, The Hospital for Sick Children, Toronto, Canada

14 8  
15 9  
16 10 Amna Rabbani - [amnarabbani@gmail.com](mailto:amnarabbani@gmail.com)

17 11 Zahra Ali Padhani - [zahra.feroz@aku.edu](mailto:zahra.feroz@aku.edu)

18 12 Faareha A Siddiqui - [faareha.siddiqui@gmail.com](mailto:faareha.siddiqui@gmail.com)

19 13 Jai K Das - [jai.das@aku.edu](mailto:jai.das@aku.edu)

20 14 Zulfiqar A Bhutta - [zulfiqar.bhutta@sickkids.ca](mailto:zulfiqar.bhutta@sickkids.ca)

21 15  
22 16  
23 17 **Corresponding Author**

24 18 Zulfiqar A Bhutta

25 19 Centre for Global Child Health, The Hospital for Sick Children

26 20 686 Bay Street, Toronto, ON M5G 0A4, Canada

27 21 Tel: +1 416 813 7654x328532

28 22 Email: [zulfiqar.bhutta@sickkids.ca](mailto:zulfiqar.bhutta@sickkids.ca)

## 24 **ABSTRACT**

### 25 **Background**

26 Breastfeeding in conflict settings is known to be the safest way to protect infant and young  
27 children from malnourishment and increased risk of infections. This comprehensive review  
28 assesses the evidence on infant and young child feeding (IYCF) practices in conflict settings.

### 29 **Methodology**

30 We conducted an extensive search from the year 1980 until August, 2019. We included studies  
31 conducted in armed conflict settings and within five years of cessation of conflict; assessing IYCF  
32 practices, barriers, programs and guidelines to promote and improve IYCF practices. Two review  
33 authors independently assessed and screened studies for eligibility and extracted data, followed  
34 by a descriptive and thematic analysis.

### 35 **Results**

36 We included 56 studies in our review and broadly classified into four pre-determined sections;  
37 epidemiology, barriers/enablers, programs/interventions and implementation guidelines.  
38 Epidemiological evidence showed that IYCF practices were generally poor in conflict settings, with  
39 median prevalence of exclusive breastfeeding at 25%, continued breastfeeding 29%, and bottle-  
40 feeding rates 58.3%, and the prevalence of malnutrition and infectious diseases was high.

41 IYCF practices were affected by displacement, stress, maternal malnutrition and mental health,  
42 family casualties and free distribution of BMS. Several interventions were implemented including  
43 training of health workers, lactation-support service, BFHI, mother-baby friendly spaces and  
44 support groups. The evidence suggests that to improve IYCF, it is imperative to disseminate the  
45 guidelines and implementation plan early with coordination between all relevant stakeholders. A  
46 single lead entity should be responsible for implementing and monitoring IYCF guidelines and  
47 regulating distribution of BMS. There should be adequate dedicated funds and capacity building of  
48 all staff. Formula feeding should be the last resort for individuals after expert evaluation.

### 49 **Conclusion**

50 The evidence generated from our study shows that IYCF practices are generally poor in conflict  
51 settings but with much potential for improvement with effective interventions and proper  
52 implementation of IYCF guidelines.

### 53 **Key Words**

54 Breastfeeding, IYCF, conflict, epidemiology, barriers, programs, guidelines

56 **Word Count:** 6061 words

1  
2  
3  
4  
5  
6  
7  
8  
9  
10  
11  
12  
13  
14  
15  
16  
17  
18  
19  
20  
21  
22  
23  
24  
25  
26  
27  
28  
29  
30  
31  
32  
33  
34  
35  
36  
37  
38  
39  
40  
41  
42  
43  
44  
45  
46  
47  
48  
49  
50  
51  
52  
53  
54  
55  
56  
57  
58  
59  
60

57

For peer review only

## 58 **STRENGTHS AND LIMITATIONS OF THIS STUDY**

- 59 1. This is a first comprehensive review of Infant and young child feeding practices in conflict  
60 settings looking at the evidence on the current practices of breastfeeding and  
61 complementary feeding and specific barriers to adapting optimal IYCF practices. This  
62 review also explores the evidence of the effective strategies to improve IYCF practices and  
63 the evidence from implementation guidelines to guide on what and how should we  
64 approach IYCF in such contexts.
- 65 2. The review highlights the high burden of disease and undernutrition and low uptake of  
66 standard IYCF practices in children affected by conflict.
- 67 3. There is scarcity of evidence as many programs in conflict contexts are not reported and  
68 most of the included studies did not comprehensively evaluate the program impact.
- 69 4. The evidence from the strategies/interventions implemented in conflict areas to improve  
70 IYCF practices though weak, provides important insights to interventions to focus to  
71 improve IYCF practices.
- 72 5. The synthesis of the implementation guidelines framed by various stakeholders with  
73 experience in working in such contexts underscores the need to emphasize on IYCF and  
74 provides a roadmap how to holistically approach this.

75

## 76 INTRODUCTION

77 Optimal infant and young child feeding practices (IYCF) play a critical role in determining the  
78 nutritional status, health, growth and development of children, along with improving the health of  
79 mothers<sup>1-4</sup>.

80 The current guidelines suggest breastfeeding to be initiated within the first hour of birth and  
81 infants exclusively breastfed for the first six-months of life, i.e. receive only breast milk, with the  
82 exception of oral rehydration solutions and drops/syrups of vitamins, minerals and medicines<sup>2, 7,</sup>  
83 <sup>45</sup>. Exclusive breastfeeding (EBF) offers the required nourishments for normal growth and  
84 development till six months of age<sup>1</sup>; thereafter safe, timely and nutritionally adequate  
85 complementary foods should be added to the diet of infants, along with continued breastfeeding  
86 up to two years of age<sup>2, 7, 45</sup>.

87 Children who have been breastfed for longer periods of time tend to exhibit lower odds of  
88 infectious morbidity and mortality<sup>5</sup>, as infants who are not breastfed have six-fold greater risk of  
89 infections related in the first two-months of life when compared to infants that have been  
90 adequately breastfed<sup>8</sup>. The current evidence suggests that high-income countries (HICs) practice  
91 shorter duration of breastfeeding (<20%) compared to low and middle- income countries (LMICs)<sup>5</sup>.  
92 However, even within LMICs, approximately only 37% of infants younger than six-months are  
93 exclusively breastfed<sup>5</sup>. Just scaling up and promoting breastfeeding to an optimal level could  
94 possibly prevent 823,000 annual deaths in children under the age of five<sup>5</sup> and 13.8% of these  
95 under two years of age<sup>5</sup>.

96 During times of armed conflict and emergencies; vulnerable groups including children bear the  
97 greatest negative consequences. The onset of conflict increases death rates by up to 24 times,  
98 with adverse effects especially for children under the age of five years<sup>11</sup>. Newborns are specifically  
99 at a higher risk of dying if they are poor, exposed to unsafe environments, or if they are within a  
100 conflict setting<sup>8</sup>. Armed conflict significantly impacts breastfeeding practices with lower rates of  
101 breastfeeding observed in war-torn areas<sup>6</sup>. Before Lebanon's conflict in 2006, approximately 27%  
102 of mothers exclusively breastfed for the first four-months of life and after the conflict escalated,  
103 the breastfeeding practices were severely affected with most mothers discontinuing breastfeeding  
104 altogether or initiating mixed feeding and/or reduced breastfeeding<sup>10</sup>.

105 In emergency situations; breastfeeding is of crucial importance because it is regarded as the safest  
106 way to protect infants and young children from infections and malnourishment<sup>9</sup>. This can be  
107 corroborated by the fact that during emergency situations; mortality rates of artificially-fed infants  
108 are greatly elevated in comparison to breastfed babies<sup>8</sup>, as the risk mortality due to diarrhea and  
109 other infectious diseases are 20 times higher than infants who have been exclusively breastfed<sup>10</sup>.  
110 This is due to prevalent unhygienic conditions coupled with lack of safe water and facilities to  
111 sterilize feeding bottles and prepare formula safely. Support for optimal breastfeeding and re-  
112 lactation should be the first choice of intervention during conflict situations to mitigate feeding  
113 problems for infants and young infants<sup>12</sup> and should not be undermined by inappropriate  
114 distribution of Breast Milk Substitutes (BMS)<sup>1, 11, 12</sup>. There is currently no existing comprehensive  
115 review for IYCF in conflict settings. We in this paper aim to generate the evidence on IYCF



1  
2  
3 116 practices, factors associated with IYCF, to assess the evidence of the interventions undertaken and  
4 117 guidelines to improve IYCF practices amongst populations affected by conflict.

## 6 118 **CONCEPTUAL FRAMEWORK**

8 119 During armed conflicts, IYCF practices are disrupted due to displacement, casualties, lack of  
9 120 resources, stress, and malnutrition, as well as due to unregulated BMS donations by agencies. We  
10 121 developed a conceptual framework to guide this review and highlighting the IYCF practices and  
11 122 factors responsible for improving IYCF practices in an armed conflict setting (Figure 1). It also  
12 123 focuses on the evidence of current IYCF practices, factors associated with improving IYCF and the  
13 124 evidence from interventions and programs implemented in these settings. We also explored  
14 125 existing implementation guidelines and program recommendations for improving IYCF practices  
15 126 from different agencies working in such settings.

## 18 127 **METHODOLOGY**

20 128 We conducted a systematic review for the available published and grey literature looking at four  
21 129 domains including epidemiology (coverage of key IYCF and malnutrition indicators),  
22 130 enablers/barriers (for recommended IYCF practices), interventions/programs (effectiveness in  
23 131 improving IYCF practices) and implementation guidelines to improve IYCF practices in conflict  
24 132 settings.

### 28 133 **Eligibility Criteria**

30 134 We included studies assessing the impact of conflict on IYCF practices and enablers/barriers,  
31 135 interventions/programs and guidelines to promote or facilitate IYCF in conflict settings. We  
32 136 included studies conducted in an armed conflict setting, defined as 'a political conflict in which  
33 137 armed combat involves the armed forces of at least one state (or one or more armed factions  
34 138 seeking to gain control of all or part of the state) and in which people have been killed by the  
35 139 fighting during the course of the conflict'<sup>13</sup>. We included studies conducted within five years of the  
36 140 cessation of conflict and included primary research articles, reports and grey literature and policy  
37 141 and guidelines. We included all studies conducted in conflict settings of low, low-middle income  
38 142 and upper-middle income countries classified by World Bank (WB)<sup>14</sup>, during the period of 1980 to  
39 143 2018 and we also included studies conducted in refugee camps in HIC.

43 144 We excluded studies conducted in HICs apart from refugee camps and on military personnel.  
44 145 Clinical studies (exclusively looking at microbiological/laboratory outcomes/screening or  
45 146 diagnostic test evaluations or surgical techniques/outcomes) and mathematical modeling or  
46 147 economic study (with no empirical data/information), systematic and literature reviews were  
47 148 excluded from the study. We also excluded studies conducted in humanitarian emergencies apart  
48 149 from armed conflict.

### 51 150 **Data Management**

53 151 We searched PubMed and CENTRAL using our search strategy constructed by using Medical  
54 152 Subject Headings (MESH) and key words (Box 1). The bibliographies of relevant systematic reviews

1  
2  
3 153 and included studies were searched to identify the missing records in the database search. We  
4 154 only included articles in English language. Additionally, a grey literature search was conducted on  
5 155 Google and websites and publications of relevant agencies such as WHO (GINA), UNICEF, UNHCR,  
6 156 International Baby Food Action Network, IBFAN, Emergency Nutrition Network (ENN), Baby Milk  
7 157 Action, Save the Children, Action contre la faim (ACF) and Wellstart International. We also  
8 158 searched for additional data by entering titles of all included studies on Google and reviewing the  
9 159 first 10 pages to include any relevant missing studies.

### Box 1: Search Strategy

("Disasters"[Mesh] OR "Disaster Victims"[Mesh] OR "Natural Disasters"[Mesh] OR mass disaster OR catastrophe\* OR crisis OR crises OR war OR "afghan campaign" OR "Armed Conflicts"[Mesh] OR conflict OR conflicts OR war OR avalanche\* OR cyclone\* OR drought\* OR earthquake\* OR flood\* OR hurricane\* OR landslid\* OR land slide OR land slides OR mudslid\* OR mudslides OR mud slide OR mud slides OR storm\* OR tornado\* OR tsunami\* OR typhoon\* OR volcano\*) AND ("Refugees"[Mesh] OR refugee OR asylum seeker\* OR returnees OR "IDP" OR "IDPs" OR internally displaced person\* OR mother\* OR "lactating" OR "lactating mother" OR "lactating mothers") AND (Breastfeed\* OR "breast feeding" OR "breastfed" OR "exclusive breastfeeding" OR "human milk" OR "lactation" OR infant feed\* OR complementary feed\* OR "IYCF" OR "Infant and Young Child Feeding" OR "early initiation" OR "colostrum" OR "breastfeeding practices" OR "breastfeeding promotion" OR "breastfeeding facilitation" OR barriers OR "breast milk collection" OR "breast milk collections" OR "breast milk expression" OR "breast milk expressions" OR "breast pumping" OR "breast pumpings" OR "breastmilk collection" OR "breastmilk collections" OR "breastmilk expression" OR "breastmilk expressions" OR "milk bank" OR "feeding bank")

38 160 After running the electronic search, all records were imported to EndNote software<sup>15</sup> and were  
39 161 de-duplicated prior to title and abstract screening. Two reviewers independently screened titles  
40 162 and abstracts, followed by full text screening. All the discrepancies were resolved after discussion  
41 163 at each stage and a third reviewer was contacted incase two reviewers were unable to reach a  
42 164 consensus. Data was extracted independently by two reviewers from the included studies in an  
43 165 excel sheet after the full text screening. We calculated the median of all IYCF and malnutrition  
44 166 indicators from the studies identified and conducted a descriptive and thematic analysis of  
45 167 included studies to explore and synthesize information on the contextual factors and intervention  
46 168 and recommended implementation strategies.

50 169 We obtained ethical approval of this study from the Ethical Review Committee of Aga Khan  
51 170 University, Karachi and the National Bioethics Committee, Pakistan. The funding for this review was  
52 171 received from the Family Larsson-Rosenquist Foundation.

### 172 Patient and Public Involvement

173 This research was done without patient involvement. Patients were not invited to contribute to  
174 the writing or editing of this document for readability or accuracy.

## 175 RESULTS

176 We identified a total of 56 studies (Figure 2) which were broadly classified into the pre-  
177 determined four sections; epidemiology, enablers/barriers, programs/interventions and  
178 implementation guidelines.

179

### 180 Epidemiology

#### 181 IYCF Practices

182 Twenty-four studies reported on the prevalence of breastfeeding and the burden of disease in  
183 different conflict-affected regions<sup>9, 11, 16-37</sup>. Eighteen were reports<sup>9, 11, 16-18, 23, 26-37</sup>, five were cross  
184 sectional studies<sup>19, 21, 22, 24, 25</sup>, and one was a cohort study<sup>20</sup>. Seven studies were conducted in  
185 Middle East<sup>9, 17, 27-29, 31, 33</sup>, six in Europe<sup>16, 17, 24, 25, 34, 35</sup>, five in Africa<sup>16, 18-20, 36</sup>, four in Asia<sup>26, 30, 32, 37</sup>  
186 and two reported on prevalence in more than one region which included Africa<sup>11</sup>, Asia<sup>11, 23</sup> and  
187 Middle East<sup>23</sup>. The included studies collected data through various sources and methods; five  
188 studies included data from national assessments done by the WHO and other developmental  
189 partners<sup>11, 17, 23, 28, 29</sup>, five conducted cross sectional household surveys<sup>21, 22, 24, 33, 34</sup>, four collected  
190 data from multiple indicator cluster survey (MICS)<sup>9, 25-27</sup>, four conducted SMART surveys<sup>16, 18, 30, 37</sup>,  
191 one distributed questionnaires<sup>19</sup>, one collected data from national surveillance system registry<sup>20</sup>,  
192 one through Disease Early Warning System (DEWS) surveillance network<sup>32</sup> and two did not  
193 specify<sup>31, 36</sup>.

194 Twenty studies reported on IYCF according to the WHO IYCF indicators which are summarized in  
195 Table 1<sup>16-28, 30, 31, 33-37</sup>. These studies analyzed IYCF indicators divided into WHO eight core  
196 indicators (early initiation of breastfeeding, exclusive breastfeeding under six months, continued  
197 breastfeeding at one year, introduction of solid, semi-solid or soft foods, minimum dietary  
198 diversity, minimum meal frequency, minimum acceptable diet and consumption of iron-rich or  
199 iron-fortified foods) and seven optional indicators (children ever breastfed, continued  
200 breastfeeding at two years, age-appropriate breastfeeding, predominant breastfeeding under six  
201 months, duration of breastfeeding, bottle feeding and milk feeding frequency of non-breastfed  
202 children)<sup>38</sup>. The median prevalence of early initiation of breastfeeding in conflict-affected areas  
203 was 51% (range: 31.3% to 85%), EBF was 25% (5.5% to 77.1%), introduction of solid, semi-solid or  
204 soft foods was 71.1% (40.7% to 98.6%), minimum dietary diversity was 60.3% (9.2% to 79.4%),  
205 children ever breast-fed was 92% (62.8% to 98.4%), continued breastfeeding at two years was 29%  
206 (9% to 66%), age-appropriate breastfeeding was 43.2% (19.5% to 77.8%), predominant  
207 breastfeeding was 31.3% (7.1% to 77.3%) and bottle feeding was 58.3% (31.8% to 71.4%). The  
208 median prevalence of global acute malnutrition (GAM) was 9.95% (2.6% to 25.1%), moderate  
209 acute malnutrition (MAM) was 4.0% (0.27% to 25%) and severe acute malnutrition (SAM) was  
210 1.5% (0.15% to 5.3%).

211 Two studies<sup>19, 24</sup> reported on association of breastfeeding with malnutrition in displaced Bosnian<sup>24</sup>  
212 and Saharawi children<sup>19</sup>. Infants were more likely to be malnourished (MUAC <125mm) who were  
213 never breastfed (Odds Ratio (OR): 1.78, 95% CI: 1.26, 2.52) or who were not breastfed for at least  
214 four months (OR: 1.45, 95% CI: 1.02, 2.07) than those who were ever breastfed or were breastfed  
215 for four months. Malnutrition persisted among infants who were not exclusively breastfed and  
216 infants who were breastfed for less than five to six months were more likely to be malnourished  
217 (OR:1.98, 95% CI: 1.01, 7.35) than those who were breastfed for more than six months<sup>24</sup>. After  
218 adjusting for diseases, mother's BMI and child's age; prevalence of underweight and wasting was  
219 low among children who were predominantly or exclusively breastfed (MD: 0.62, 95%CI: 0.10, 1.13  
220 and 0.41, 95% CI: -0.08, 0.91 respectively)<sup>19</sup>.

## 221 Burden of disease

222 Three studies conducted in countries affected by armed conflict reported on morbidity and  
223 mortality of children under five years of age<sup>11, 18, 20</sup>. The crude mortality rate (CMR) was 2.78  
224 deaths/10,000 per day in South Sudan during the crisis and the under-five mortality rate (U5MR)  
225 was 0.71 deaths/10,000 per day<sup>18</sup>. During the conflict, the U5MR was 58 in Guatemala, 250 in  
226 Afghanistan and 316 in Sierra Leone<sup>11</sup>. The infant mortality rate (IMR) in 43 in Guatemala, 165 in  
227 Afghanistan and 182 in Sierra Leone<sup>11</sup>. A study from Guinea Bissau reported a six-fold higher  
228 mortality (MR:5.73, 95%CI: 2.40, 13.71) among weaned children aged 9-35 months compared to  
229 breastfed children during the war<sup>20</sup> and this could be attributed to overcrowding, higher infection  
230 prevalence during the war, and poor access to care<sup>20</sup>. Five studies reported on prevalence of  
231 diarrhea in under-five children living in conflict-affected countries<sup>11, 21, 30, 32, 37</sup>; 28.9% children  
232 suffered from diarrhea in Yemen (Taiz governorate)<sup>37</sup>, 30% in Guatemala<sup>11</sup> and during an outbreak  
233 73.8% internally displaced children in Pakistan had diarrhea<sup>32</sup>. Mortality due to diarrhea among  
234 Afghan refugees in Pakistan was 22.3%<sup>30</sup>. Due to conflict, mortality from diarrhea increased from  
235 20.0% to 87.0% amongst Rwandan refugees in Zaire in 1994, from 20% to 39.0% amongst IDPs in  
236 Somalia in 1992, and from 22.9% to 74% in Kurdish refugees in Iraq in 1991<sup>11</sup>. However, the  
237 mortality rates due to diarrhea amongst Rwandan refugees in Nepal from 1992-1993 remained  
238 the same (22.9%) and decreased amongst residents in eastern Democratic Republic of Congo  
239 (DRC) in 2000 from 20.0% to 11.0% during conflict<sup>11</sup>. This study also reported measles, meningitis,  
240 malaria and respiratory infection as major reason of under-five mortality during conflict<sup>11</sup>.  
241 Mortality rates due to measles increased from 10.1% to 36.5% amongst IDPs in Somalia in 1992  
242 during conflict<sup>11</sup>. Deaths due to respiratory infections also increased from 26.2% to 41.4% among  
243 Rwandan refugees in Zaire in 1994, and deaths due to malaria increased from 15.5% to 26.0% in  
244 residents in eastern DRC in 2000<sup>11</sup>.

## 245 Enablers/ Barriers

246 Eighteen studies reported on enablers/barriers to IYCF practices in conflict settings (Figure 3)<sup>9, 17-</sup>  
247 <sup>19, 21-29, 34, 39-42</sup>. Of these, 12 were reports<sup>9, 17, 18, 23, 26-29, 34, 40-42</sup> and six were cross sectional studies<sup>19,</sup>  
248 <sup>21, 22, 24, 25, 39</sup>. Seven studies were conducted in Europe<sup>21-25, 34, 41</sup>, five in Middle East<sup>9, 17, 27-29</sup>, three in  
249 Africa<sup>18, 19, 39</sup>, one in Asia<sup>26</sup>, one study was conducted in both Asia and Europe<sup>40</sup>, and one failed to  
250 report<sup>42</sup>. Nine studies reported on refugees<sup>9, 17, 19, 23, 27, 28, 36, 40, 41</sup>, four on IDPs<sup>18, 21, 22, 29</sup>, three on

1  
2  
3 251 non-displaced residents<sup>24, 26, 39</sup> and two failed to report on the target population<sup>25, 42</sup>. Nine studies  
4 252 were conducted in camps<sup>9, 17, 19, 23, 27, 28, 36, 40, 41</sup>, seven in community<sup>18, 21, 22, 24, 26, 29, 39</sup> and two did  
5 253 not report<sup>25, 42</sup>.

6  
7  
8 254 Breastfeeding declined significantly in regions with high levels of conflict-related violence relative  
9 255 to areas which were considered the 'safest areas' in Iraq<sup>26</sup>. A mother residing in dangerous areas  
10 256 of Iraq was 17.4% more likely to stop breastfeeding compared to mothers living in the safe areas<sup>26</sup>.  
11 257 In Bosnia-Herzegovina, illness of mother/baby disrupted breastfeeding and a few mothers made a  
12 258 personal decision not to breastfeed<sup>25</sup>. Other reasons that negatively affected breastfeeding  
13 259 practices in conflict affected areas were unavailability of trained healthcare professionals, and  
14 260 disruption in knowledge created by violent conflict<sup>17, 26</sup>.

15  
16  
17 261 Ten studies reported the common misconception amongst refugees, media, and humanitarian  
18 262 workers that mothers produce poor quality, insufficient milk due to malnourishment and stress  
19 263 induced as an impact of war<sup>17, 18, 21, 23, 26, 28, 29, 34, 40, 42</sup>. These misconceptions led to mothers feeding  
20 264 undiluted animal milk to infants younger than four months<sup>18</sup>. In Bosnia-Herzegovina and Jordan,  
21 265 health professionals discouraged mothers from breastfeeding due to significant maternal weight  
22 266 loss during conflict<sup>17, 21</sup>. Breastfeeding practices of mothers were affected by mental trauma from  
23 267 fighting and due to war-related casualties in male members of the family<sup>18, 24, 26, 28, 40</sup>. In Bosnia-  
24 268 Herzegovina, infants were less likely to be breastfed for more than 4 months if they resided closer  
25 269 to the area of conflict and if the household was not receiving remittances from abroad<sup>24</sup>.

26  
27  
28  
29 270 Refugees in Lebanon and Greece considered BMS as necessary food for infants during  
30 271 emergencies and many mothers pursued mixed feeding because of the physician's prescription of  
31 272 infant formula<sup>27, 34, 42</sup>. The study on Syrian refugees in Lebanon stated that in children above six  
32 273 months, child refusal of food was due to inadequate knowledge regarding complementary feeding  
33 274 practices and the quantity of solid food that a young child should receive per day<sup>28</sup>. In Azraq  
34 275 refugee camp in Jordan, poor quality food and lack of iron-rich foods in the market was the reason  
35 276 for low consumption of iron-rich foods by the infants<sup>33</sup>. In Bosnia-Herzegovina and Lebanon,  
36 277 mothers introduced tea, sugar, water, juice and infant formula in the feeding practice to spend  
37 278 less time breastfeeding which negatively influenced the rate of EBF<sup>25, 28</sup>. Two studies' mentioned  
38 279 'lack of milk' as the reason for early weaning by mothers<sup>25, 34</sup>, and many mothers wrongly thought  
39 280 that weaning can't be reversed<sup>42</sup>. Another reason for suboptimal breastfeeding practices,  
40 281 mentioned by four studies from Iraq, Greece, Lebanon and Jordan, was the heavy marketing of  
41 282 artificial feeding and big push from infant formula companies, which made mothers believe that it  
42 283 was better<sup>9, 27, 34, 40</sup>.

43  
44  
45  
46  
47 284 Studies conducted in Algeria, Jordan, and Northern Uganda mentioned factors leading to delayed  
48 285 initiation of breastfeeding by refugee mothers as home delivery, C-section, breast pain, discarding  
49 286 initial milk, illiteracy, lack of support from medical staff, previous experience, mother being ill and  
50 287 being the sole person responsible for decision of initiating breastfeeding<sup>19, 33, 39</sup>. Mothers used pre-  
51 288 lacteal feeds before initiating breastfeeding, as colostrum was believed to be of low nutritional  
52 289 value and was considered 'dirty' and harmful<sup>19, 39</sup>. The report from Iraq and Greece mentioned



290 that many mothers assumed that their milk was 'dirty' if a previous infant died while  
291 breastfeeding, resulting in them refraining from breastfeeding the next baby<sup>40</sup>.

292 Early introduction of complementary food and infant formula also led to suboptimal breastfeeding  
293 practices<sup>25, 27, 28, 34, 42</sup>. They were introduced as early as 1-3 months because of the misconception  
294 that breastmilk was not sufficient for meeting the nutritional requirements of the infants<sup>25, 28</sup>.  
295 Seven studies focusing mainly on refugees from conflict affected countries, explored reasons for  
296 mix feeding or fully artificial feeding infants<sup>17, 25, 27, 28, 34, 40, 42</sup>. Breastfeeding practices were  
297 influenced by religious and cultural determinants and frequent migrations<sup>26, 34</sup>. Studies from  
298 Jordan and Bosnia-Herzegovina mentioned about the role of grandmothers in influencing  
299 breastfeeding practices and barriers<sup>17, 25</sup>. Grandmothers often pressurized mothers to feed BMS  
300 (water and herbs) to infants and asked mothers to follow their traditional approach. Moreover,  
301 there was a cultural belief that formula milk is safer than breast milk<sup>17, 40</sup>.

### 302 **Programs/ Interventions**

303 Breastfeeding in an emergency is known to be the safest way to protect infants and young  
304 children from an increased risk of infection and undernutrition<sup>9</sup>. To reduce the burden of disease  
305 and poor IYCF practices; several programs were launched in conflict-affected countries by  
306 different organizations (WHO, international NGOs (INGOs) and local NGOs (LNGOs)). The  
307 interventions were mostly based on the WHO guidelines to promote, protect, and support  
308 appropriate IYCF practices.

309 We included fifteen studies which reported on promotion of optimal IYCF practices in conflict  
310 settings (Table 2)<sup>9, 11, 16-18, 25, 27-29, 31, 32, 36, 40, 41, 43</sup>. Fourteen were reports<sup>9, 11, 16-18, 27-29, 31, 32, 36, 40, 41, 43</sup>  
311 and one was a cross-sectional study<sup>25</sup>. These programs were formulated based on literature  
312 review, document review and extensive discussions of stakeholders during conferences, through  
313 semi-structured interviews (e.g., open group discussions of mothers/ caregivers), and knowledge,  
314 attitude and practices (KAP) surveys. Six studies were conducted in Middle East<sup>9, 17, 27-29, 31</sup>, four in  
315 Africa<sup>16, 18, 36, 43</sup>, three in Europe<sup>11, 25, 41</sup>, one in Asia<sup>32</sup> and one study was conducted at more than  
316 one place i.e. Europe and Asia<sup>40</sup>. Eight of these focused on refugees<sup>9, 11, 17, 27, 28, 36, 40, 41</sup>, three  
317 involved IDPs<sup>18, 29, 32</sup>, one reported on both hosts and IDPs<sup>43</sup> and three studies failed to report on  
318 it<sup>16, 25, 31</sup>. Six studies were conducted in refugee camps<sup>11, 27, 28, 36, 40, 41</sup>, five in community<sup>16, 18, 29, 31,</sup>  
319 <sup>43</sup>, three in both camps as well as in clinics<sup>9, 17, 32</sup>, and one study failed to report on it<sup>25</sup>.

320 The specific interventions in these programs included capacity building of healthcare staff,  
321 education and awareness activities for mothers, community mobilization, provision of baby  
322 friendly spaces, lactation support services, complementary and safe artificial feeding support  
323 services, and baby friendly hospital initiative (BFHI)<sup>9, 11, 16-18, 25, 27-29, 31, 32, 36, 40, 41, 43</sup>. Five studies  
324 focused only on one intervention for promotion of optimal breastfeeding practices<sup>25, 29, 31, 32, 41</sup>,  
325 while rest had a multi-pronged approach<sup>9, 11, 16-18, 27, 28, 36, 40, 43</sup>. Most of the studies/programs did  
326 not evaluate the programs and its impact on IYCF practices or health and nutrition indicators. A  
327 follow-up survey after three months of intervention, assessed breastfeeding practices among  
328 Syrian refugees in Jordan, which showed an increase in breastfeeding knowledge from 49.5% in  
329 2013 to 71% in community and 91.2% in health facility in 2014. However, no improvement in

breastfeeding practices was observed<sup>17</sup>. Similarly, in Greece, formula use in the refugee camps decreased from 60% to 0% within 6 months, through their Infant and Young Child Feeding Program in Emergencies (IYCF-E)<sup>40</sup>.

### 333 **Implementation Guidelines**

334  
335 We included 30 implementation guidelines by different organizations in our review, mentioning  
336 key policies and operational guidelines to be followed during conflicts to ensure optimal IYCF  
337 practices<sup>1, 2, 33-35, 42, 45-68</sup>. Eight guidelines were by INGOs<sup>2, 34, 35, 42, 47, 52, 60, 68</sup>, nine by UN agencies<sup>45,</sup>  
338 <sup>48, 51, 54, 56-58, 66, 67</sup>, and three by academic organizations<sup>49, 50, 65</sup>, while ten guidelines were  
339 formulated by collaboration between developmental partners and INGOs<sup>1, 33, 46, 53, 55, 59, 61-64</sup>. These  
340 implementation guidelines were formulated after conducting random cluster surveys (including  
341 quantitative and qualitative analysis), meetings to gathering empirical evidence, past emergency  
342 experiences, and technical guidance from community, stakeholders, development and  
343 implementation partners.

344  
345 We included implementation guidelines from 1981 through 2018. Only one guideline was from  
346 1981-1990<sup>51</sup>, seven were from 1991-2000<sup>35, 48, 52, 54, 55, 67, 68</sup>, 12 were from 2001-2010<sup>1, 42, 45, 47, 49, 50</sup>  
347 <sup>53, 56, 57, 63, 64, 69</sup>, and ten were from 2011-2018<sup>2, 33, 34, 46, 58-60, 62, 65, 66</sup>. These guidelines focused on  
348 refugees and IDPs affected by conflict. We summarized these operational guidelines from  
349 different organizations, to be used during conflict settings, using the components from 'WHO's  
350 guiding principles for feeding infants and young children during emergencies'<sup>45</sup> (Figure 4).

#### 351 **Breastfeeding**

352  
353  
354 The guidelines on protecting, promoting and supporting breastfeeding were mentioned by 28  
355 publications<sup>1, 2, 33-35, 42, 45-56, 58-68</sup>. They recommend to practice EBF till six months of age, followed  
356 by frequent breastfeeding until two years, along with complementary feeding to protect babies  
357 from infection, especially in crisis situations. There should be formation of practical guidelines,  
358 capacity building of healthcare staff, and continuous flow of funds for the sustainability of  
359 programs.

360  
361 General population (including mothers) should be educated on breastfeeding, its benefits,  
362 colostrum use, feeding methods, and consequences of artificial feeding based on 'UNICEF/WHO  
363 Baby friendly Hospital's initiative's Ten Steps to breastfeeding'. Moreover, mothers should be  
364 counselled not to stop breastfeeding in emergency situations, sickness, and when malnourished.  
365 They should be encouraged to practice skin-to-skin contact, initiate breastfeeding within the first  
366 hour of birth, and use of pacifiers, artificial nipples and estrogen containing contraceptive pills  
367 should be discouraged.

368  
369 Guidelines also recommend formation of baby friendly spaces and mother to mother support  
370 groups to encourage breastfeeding and privacy. There should be a system set in place for  
371 identification of newly arriving mothers and infants, registration for rations and referral for  
372 immediate assistance. Mothers should be facilitated for re-lactation if separated from the baby or

1  
2  
3 373 experiencing difficulties in breastfeeding. When natural breastfeeding is not possible, wet-nursing  
4 374 and the use of milk banks, should be considered before providing infant formula or home-  
5 375 modified milk.

## 8 376 Breast-Milk Substitutes (BMS)

9  
10 377 Twenty-six guidelines reported on the use of BMS in emergency situations<sup>1, 2, 34, 35, 42, 45-56, 58-63, 65, 66,</sup>  
11 378 <sup>68</sup>. Donations, procurement, promotion (through advertisements and gifts) and distribution of  
12 379 BMS, bottles and teats should be strictly controlled and should comply with the International Code  
13 380 and World Health Assembly (WHA) regulations, and all violations should be reported (see Box 2).  
14 381 The distribution should be managed by a single designated agency and blanket distribution of BMS  
15 382 should be discouraged in emergency situations, especially where hygienic conditions can't be  
16 383 ensured.

17  
18  
19 384  
20 385 BMS are not recommended for children under 6 months of age and should only be distributed to  
21 386 infants who have no other viable breast milk options i.e. orphans, severe maternal illness or  
22 387 malnutrition (based on established criteria- where distribution can be targeted, the supply chain is  
23 388 secure, and the conditions for safe preparation and use can be met), determined by a qualified  
24 389 health worker trained in IYCF. There should be training of workforce handling BMS and  
25 390 demonstrations should be given to mothers on proper and safe use of infant formula, followed by  
26 391 regular infant health and growth monitoring. Availability of fuel, safe water and equipment should  
27 392 be ensured before BMS distribution and mothers should be advised to use cups instead of bottles  
28 393 for feeding. Moreover, it should be ensured that distribution of BMS to the targeted infant  
29 394 continues for as long as the infant needs (at least 6 months).

30  
31 395  
32  
33 396 Infant formula (generic, unbranded formula) should be distributed with labels in the local  
34 397 language to the infants in need. These labels should have clear instructions on its safe preparation,  
35 398 along with stating the importance of breast milk. Infant formula should not be excluded from the  
36 399 commodities that a mother can access via cash/voucher schemes, but it should have clear  
37 400 information on superiority of breastfeeding. For infants under six months of age, the only suitable  
38 401 BMS is infant formula and condensed milk should not be used for infant feeding and home-  
39 402 modified milk should be the last resort.

40  
41  
42 403  
43 404 Relief workers should ensure that milk products are received and distributed in a dry form and  
44 405 dried milk products are distributed only when pre-mixed with a milled staple food and should not  
45 406 be distributed as a single commodity. Moreover, it should be ensured that dried skimmed milk is  
46 407 not given to infants and for older children, it should be given after fortifying it with vitamin A.  
47 408 Relief and healthcare workers should counsel mothers to avoid baby juices and teas, and they  
48 409 should take appropriate measures to reduce spill-over by ensuring that feeding BMS to a minority  
49 410 of children doesn't undermine breastfeeding practices of the majority. In case of unfavorable  
50 411 circumstances for BMS distribution, an on-site supplementary "wet" feeding program should be  
51 412 conducted in closed spaces under supervision.

52  
53  
54 413  
55  
56  
57  
58  
59  
60



**Box 2: Violation of IYCF-E guidelines in conflict settings (Case Studies)****Case Study 1: Campaigning by Blédina company during Hezbollah–Israel Conflict, 2006: Lebanon**

A marketing campaign by Bledina (production company of infant formula and complementary foods), after the war in 2006 in Beirut, offered mothers gift packages containing promotional leaflets. The attending pediatrician also gave mothers a card with the Blédina hotline. Moreover, free Blédina gift packages were also distributed at a health center which had a high number of refugees, as a promotional campaign after the war, which was a violation of the IYCF-E guidelines<sup>10, 47</sup>.

**Case Study 2: Civil Unrest, 2002: East Timor**

Healthcare facilities in Dili distributed infant formula donated by a service organization to assist infants who have been orphaned and mothers who are unable to breastfeed, which was a violation of the guidelines because health care facilities should not distribute infant formula as it can be wrongly interpreted as them promoting the products, even if they are doing so to meet the needs of the targeted population<sup>47</sup>.

**Case Study 3: Israel-Hezbollah conflict, 2006: Lebanon**

1. During the Lebanon conflict, an NGO violated the IYCF-E guidelines by distributing 1,500 'baby kits', including infant formula and bottles, directly to displaced households, as well as to hospitals and local municipalities. Even after the conflict, the same NGO distributed 'village kits' containing infant formula (25 boxes containing 24 cans each) and baby food (80 units) along with other items to each village municipality<sup>10, 47</sup>.
2. Another violation was the donation of infant formula to the healthcare facilities by an international NGO during the Lebanon conflict<sup>10</sup>.
3. Moreover, one local NGO distributed the infant formula amongst the displaced population, without clearly specifying on the tins that it should only be used on the advice of a health worker thus violating the labelling requirements, and promoting infant formula use<sup>10</sup>.
4. Another violation occurred when single tins/samples of infant formula were distributed to mothers by health workers, without the undertaking that the infant formula supplies would continue for as long as the concerned infant needs them<sup>10</sup>.

**Case Study 4: Israel-Hezbollah conflict, 2006: Lebanon**

1. The formulas received by Lebanese government organizations and NGOs had labels written in English and/or Greek, instead of the local language, Arabic<sup>10, 47</sup>.
2. One local NGO distributed infant formula, advertising and promoting artificial feeding, which was in violation of labelling requirements<sup>10, 47</sup>.

## 415 Complementary Feeding

416 Twenty guidelines reported on complementary feeding in infants 6-24 months of age<sup>2, 33, 42, 45, 46, 49,</sup>  
417 <sup>50, 52, 55, 56, 58-60, 62-66</sup>. For normal growth and development of infants (>6 months), easily digestible  
418 complementary foods should be started along with continuation of breast milk. Discussions should  
419 be conducted in groups, and mothers should be encouraged to increase the frequency and variety  
420 of complementary food with the growing age of child to meet their nutritional demands. Mothers  
421 should be encouraged to use locally produced, inexpensive complementary foods. However, in  
422 emergency situations, micro-nutrient fortified blended foods, Ready-to-Use Supplementary Foods  
423 (RUSFs), Lipid based Nutrient Supplements (LNS) or ferrous sulphate iron solution (iron drops) can  
424 be used depending on nutritional situation. Relief workers should ensure that complementary  
425 food products are labelled in local language with instructions on preparation and do not have the  
426 images of bottle feeding on them, and donations of complementary foods, baby teas or juices  
427 should be refused. For children over the age of 12 months, it is recommended that they should eat  
428 the same food as older children. If safe complementary foods are not available, mothers should be  
429 advised to continue breastfeeding.

## 430 Caring for Caregivers and Protecting Children

431 Thirteen guidelines reported on caring for caregivers during emergencies<sup>2, 34, 45, 46, 53, 59, 61-63, 65-68</sup>  
432 and nine reported on protecting children<sup>2, 34, 46, 49, 50, 53, 58-60, 62, 63, 65, 68</sup>. Guidelines recommend  
433 provision of psychological support and empowering mothers during crisis and advising them to  
434 continue breastfeeding (via milk expression). It should be ensured that infants are screened for  
435 childhood illnesses and mothers of artificially-fed infants have access to cleaning facilities for  
436 washing utensils for safe preparation of BMS as artificially-fed infants are known to be at a greater  
437 risk of malnutrition, diarrhea and chest infections. If an infant is ill with reduced appetite, mothers  
438 should continue breastfeeding with smaller amounts and increased frequency. Relief staff should  
439 prioritize infants for re-lactation, re-establishment of exclusive breastfeeding and BMS provision  
440 and associated support services.

## 441 Malnutrition

442 Nine guidelines reported on management of malnutrition in infants during emergencies<sup>2, 45, 53, 55, 56,</sup>  
443 <sup>59, 61, 66, 68</sup>. Guidelines recommend continuous monitoring of nutritional status of mothers, infants  
444 and young children with the purpose of identifying, assessing, preventing and treating  
445 malnourished mothers and children. Malnutrition treatment and prevention programs should  
446 incorporate and prioritize IYCF in their agenda as the risk can be decreased with optimal IYCF  
447 practices. Education should be provided to community support networks on the prevention and  
448 treatment of acute malnutrition and cash/voucher programs should be introduced. For prevention  
449 of malnutrition, micronutrients should be distributed to all pregnant and lactating women (PLWs)  
450 in form of powders and tablets. It is recommended to identify malnourished children through  
451 regular monitoring and they should be referred and admitted along with their mothers to a  
452 nutritional rehabilitation program in case of severe malnourishment. In crisis situations,  
453 supplementary feeding should be the primary strategy for prevention and treatment of MAM and  
454 pre-formulated therapeutic milk products or dried skimmed milk (DSM) can be used to treat SAM.

## 455 The Acute Phase of Emergencies

456 Twelve guidelines reported on interventions to be undertaken during the acute phase of  
457 emergencies<sup>1, 2, 42, 45, 46, 52, 56, 59, 62, 63, 65, 68</sup>. In case of an emergency, interventions should start  
458 immediately with focus on capacity building to improve IYCF-E practices, supporting caregivers  
459 and catering to nutritional needs of children in order to minimize the negative impact of  
460 emergency. In places with prior high infant formula use, appropriate interventions should be  
461 undertaken by relevant organizations to increase prevalence of appropriate IYCF-E practices and  
462 increase the rate of EBF and measures should be taken to monitor BMS donations and distribution  
463 during early phases of emergencies. Moreover, mothers should be educated and encouraged to  
464 breastfeed every 2-3 hours at breastfeeding stations scattered across refugee sites. If mothers are  
465 experiencing difficulty in breastfeeding, chlorpromazine can be used to stimulate milk production  
466 and wet-nursing and milk banks can also be used as an alternative to BMS.

## 467 Assessment, Intervention and Monitoring

468  
469 Fifteen guidelines mentioned assessment, intervention and monitoring during emergencies<sup>1, 2, 33,</sup>  
470 <sup>45, 46, 52, 53, 58-62, 65, 66, 68</sup>. There should be regular systematic monitoring to track BMS distribution and  
471 careful monitoring of optimal feeding and nutritional status of infants and young children. It is  
472 recommended to conduct weight monitoring, assess intake, urination frequency, and activity level  
473 for those receiving BMS. Healthcare staff should use qualitative as well as quantitative methods to  
474 gather data regarding pre-crisis practices, demographics, morbidity, mortality, malnutrition and  
475 current IYCF practices.

## 477 Breastfeeding and HIV

478 Eleven guidelines reported on breastfeeding in HIV situations<sup>2, 46, 48, 56-59, 61, 64, 68</sup>. Guidelines  
479 recommend that appropriate measures should be undertaken to prevent mother-to-child  
480 transmission of HIV, and improve child survival from HIV. If the mother's HIV status is negative or  
481 unknown (or HIV testing is not available), she should be advised to continue age appropriate  
482 breastfeeding and replacement feeding should only be supported if is acceptable, feasible,  
483 affordable, sustainable and safe (meets the AFASS criteria). For sustainable access to medical care,  
484 HIV positive mothers should be provided with antiretroviral treatment (ART) and, in case of  
485 unavailability of ARTs, breastfeeding should be continued.

486 If HIV-positive mothers choose not to breastfeed the infant, appropriate BMS should be provided  
487 along with counselling on the risks of mixed feeding and artificial feeding. Wet nursing should also  
488 be considered in cases of HIV-positive mothers and wet nurse should be counseled on prevention  
489 of disease transmission. IYCF-E staff should make supportive arrangements for HIV-positive  
490 mothers to build confidence, reduce isolation, encourage age appropriate feeding and educate the  
491 family members to provide full support to the mothers and conduct regular follow ups.  
492 Furthermore, activities related to Prevention/Elimination of Mother-to-Child Transmission  
493 (PMTCT) should be regularly done as part of nutritional interventions and the measures taken by  
494 ICYF-E staff should be sensitive.

## DISCUSSION

This review included a total of 56 primary studies and grey literature, covering IYCF practices, programs and guidelines for the countries affected by armed conflict. The review shows that the IYCF practices are very low and sub-optimal in conflict settings, as only half of the children receive early initiation of breastfeeding and a quarter of children are exclusively breastfed. The other IYCF indicators are also not very encouraging, with high rates of bottle-feeding. The review also shows a high burden of childhood malnutrition and infectious diseases especially diarrhea in conflict settings leading to a rise in diarrhea specific mortality. Conflict has a direct impact of IYCF practices as during the conflict in Iraq, the EBF decreased from 40% in the first month to 6% in the fifth month of conflict<sup>26</sup> and prevalence of GAM increased from 16.1% to 19.6% within a year of conflict in South Sudan<sup>18</sup>.

There are many reasons for low IYCF indicators including displacements, stress, maternal malnourishment, lack of awareness, and unavailability of trained healthcare professionals. The death of the male members within the family also poses an additional barrier, as apart from increased maternal mental stress, it also leads to additional maternal responsibilities, hence compromising the attention to children. The review suggests there are misconceptions in the community that malnourishment and stress amongst mothers leads to decrease in the quantity and quality of breast milk, hence children should be supported with BMS. Health workers also in some instances advocate and prescribe BMS due to their lack of awareness and knowledge and the unregulated marketing, provision and distribution of BMS further compromises the situation.

There is a need to enhance the capacity of the health workers and enhance communication with the community utilizing various channels, and though various programs have been initiated in these conflict settings<sup>44</sup>, but unfortunately none of these has been formally evaluated to gauge the impact of these different approaches. The major evidence and recommendations are from the implementation guidelines which have been formulated by various agencies with experience in working in these contexts. First and foremost, the importance of IYCF should be underscored and it should be a top priority for improving health of children in conflict settings. There should be an early dissemination of policies to all concerned agencies and healthcare workers with a greater emphasis on improving the capacity of the health workers. All the women and mothers should be registered whether in camps, or IDPs or living in conflict zones with possible tracking of their movement.

Educational approaches should be drafted with specific messages to alleviate the context specific common misconceptions within the community. Various communications platforms could be utilized to spread these messages including women support groups, involving prominent community members, designing pictorials, brochures or videos. There should be designated places like feeding tents which could provide a personal space for women to feed their children, seek support from peers and these could also be avenues for skin to skin care for preterm and low birthweight infants. The provision of clean hygienic utensils and safe drinking water should also be ensured for preparing complementary feeds. The BFHI should be strengthened in the functioning health facilities. The mothers apart from access to healthcare, should also be provided with

1  
2  
3 535 lactation and psychological support. The other factors include high turnover rate of health  
4 536 workers, lack of funds, poor multi-sectoral coordination, poor monitoring and evaluation system,  
5 537 more focus on malnutrition treatment than prevention, strengthened marketing efforts of BMS by  
6 538 industries, and poor capacity at community level.

8  
9 539 The additional approaches like 'wet nurse' and 'milk banks' could be sought for only mothers who  
10 540 could not breastfeed and after confirmation from specialists, but BMS should be the last resort<sup>3</sup>.  
11 541 There should be stringent regulatory checks on BMS and nipples and pacifiers with no marketing  
12 542 and unchecked supply of formula milk<sup>3, 71</sup>. All of the commodities in a conflict setting should flow  
13 543 through a common medium and a single designated agency should be responsible for controlling  
14 544 donations and distributing appropriately labeled infant formula, and any violation to these should  
15 545 be reported with timely action taken. In cases of acute emergency, RUSF and LNS could be  
16 546 distributed.

19  
20 547 A similar study by Seal 1999<sup>69</sup> and Seal 2001<sup>12</sup> reported on constraints in implementation of  
21 548 guidelines and policy on IYCF. Another study, Prudhon 2018 analyzed 28 reviews on interventions  
22 549 to promote breastfeeding from LMICs in conflict and disaster settings<sup>70</sup> and it also reported a  
23 550 dearth of evidence on IYCF-E outcomes. One of the major strengths was that our review was  
24 551 comprehensive looking at various areas of IYCF. The limitations of our review include restricted  
25 552 access to studies conducted by various NGOs/ agencies as most of them don't report and we  
26 553 included articles published in English and some of the included studies were of poor quality which  
27 554 failed to report on study context (e.g. year and scale of conflict/surveys), outcomes, and on  
28 555 process indicators. We found only three studies from conflict-affected countries in Asian region.  
29 556 Furthermore, most of the included studies did not comprehensively evaluate the program impact  
30 557 so analysis couldn't be performed. Therefore, there is a critical need of further research on the  
31 558 process of implementation, effectiveness of IYCF interventions and cost effectiveness of these  
32 559 interventions in conflict settings.

36  
37 560 To ensure effective scale-up of interventions for promotion of IYCF, there should be evidence-  
38 561 based advocacy, need-based assessments, committed funding, political will, and structured,  
39 562 rigorous monitoring and evaluation system and multi-sectoral approach emphasizing on IYCF  
40 563 together with immunization, infectious diseases management and growth monitoring.

42  
43 564  
44  
45  
46  
47  
48  
49  
50  
51  
52  
53  
54  
55  
56  
57  
58  
59

565 **LIST OF ABBREVIATIONS**

|        |                                                                 |
|--------|-----------------------------------------------------------------|
| ACF    | Action contre La Faim                                           |
| AFASS  | Acceptable, Feasible, Affordable, Sustainable and Safe          |
| ARI    | Acute Respiratory Infection                                     |
| ART    | Antiretroviral Treatment                                        |
| BFHI   | Baby Friendly Hospital Initiative                               |
| BMS    | Breast-Milk Substitutes                                         |
| CAR    | Central African Republic                                        |
| CMR    | Crude Mortality Rate                                            |
| DEWS   | Disease Early Warning System                                    |
| DRC    | Democratic Republic of Congo                                    |
| DSM    | Dried Skimmed Milk                                              |
| EBF    | Exclusive Breastfeeding                                         |
| ENN    | Emergency Nutrition Network                                     |
| GAM    | Global Acute Malnutrition                                       |
| GINA   | Global Database on the Implementation of Nutrition Action       |
| HIC    | High Income Countries                                           |
| HIV    | Human Immunodeficiency Virus                                    |
| IBFAN  | The International Baby Food Action Network                      |
| IDPs   | Internally Displaced Persons                                    |
| IMR    | Infant Mortality Rate                                           |
| IYCF   | Infant and Young Child Feeding                                  |
| IYCF-E | Infant and Young Child Feeding in Emergencies                   |
| KAP    | Knowledge, Attitude and Practices                               |
| LMIC   | Low- and Middle-Income Countries                                |
| LNGO   | Local Non-Governmental Organization                             |
| LNS    | Lipid-based nutrient supplements                                |
| MAM    | Moderate Acute Malnutrition                                     |
| MESH   | Medical Subject Headings                                        |
| MICS   | Multiple Indicator Cluster Survey                               |
| MR     | Mortality Rate                                                  |
| MtMSG  | Mother-to-Mother Support Groups                                 |
| WB     | World Bank                                                      |
| MUAC   | Mean Upper Arm Circumference                                    |
| NGO    | Non-Governmental Organization                                   |
| INGOs  | International Non-Governmental Organization                     |
| PLW    | Pregnant and Lactating Women                                    |
| PMTCT  | Prevention/Elimination of Mother-to-Child Transmission          |
| RUSF   | Ready-to-Use Supplementary Foods                                |
| SAM    | Severe Acute Malnutrition                                       |
| SMART  | Standardized Monitoring and Assessment of Relief and Transition |
| SOPs   | Standard Operating Procedures                                   |
| TBA    | Traditional Birth Attendants                                    |

1  
2  
3  
4  
5  
6  
7  
8  
9  
10  
11  
12  
13  
14  
15  
16  
17  
18  
19  
20  
21  
22  
23  
24  
25  
26  
27  
28  
29  
30  
31  
32  
33  
34  
35  
36  
37  
38  
39  
40  
41  
42  
43  
44  
45  
46  
47  
48  
49  
50  
51  
52  
53  
54  
55  
56  
57  
58  
59  
60

566

|        |                                                        |
|--------|--------------------------------------------------------|
| U5MR   | Under Five Mortality Rate                              |
| UN     | United Nations                                         |
| UNHCR  | The United Nations High Commissioner for Refugees      |
| UNICEF | United Nations International Children's Emergency Fund |
| WHA    | World Health Assembly                                  |
| WHO    | World Health Organization                              |

For peer review only



1  
2  
3 567 **DECLARATIONS**  
4

5 568 **Ethical Approval**  
6

7 569 We obtained ethical approval of this study from the Ethical Review Committee of Aga Khan  
8 570 University, Karachi and the National Bioethics Committee, Pakistan.  
9

10 571 **Consent for Publication**  
11

12 572 Not Applicable  
13

14 573 **Acknowledgements**  
15

16 574 None  
17

18 575 **Competing Interests**  
19

20 576 All the authors declare no conflict of interest. The corresponding author is the overall guarantor  
21 577 and affirms that the manuscript is an honest, accurate, and transparent account of the study.  
22

23 578 **Data Sharing**  
24

25 579 The datasets used for analysis in this study are available from the corresponding author on  
26 580 reasonable request. As this is a systematic review, dissemination to the groups is not applicable.  
27

28 581 **Funding**  
29

30 582 The Aga Khan University received a grant from the Family Larsson-Rosenquist Foundation. The  
31 583 funders had no role in the findings and writing of the manuscript.  
32

33 584 **Authors' Contributions**  
34

35 585 ZAB and JKD conceived the idea of the review. ZAP developed the search strategy; AR, ZAP and  
36 586 FAS conducted the search and data extraction with specific inputs from JKD. AR, ZAP and JKD  
37 587 developed the first draft of the paper. ZAB and JKD reviewed and finalized the final manuscript.  
38

39 588  
40  
41  
42  
43  
44  
45  
46  
47  
48  
49  
50  
51  
52  
53  
54  
55  
56  
57  
58  
59  
60



## 589 REFERENCES

- 590 1. Borrel A, Taylor A, McGrath M, Seal A, Hormann E, Phelps L, et al. From policy to practice:  
591 challenges in infant feeding in emergencies during the Balkan crisis. *Disasters*. 2001;25(2):149-63.
- 592 2. ACF-International. *Infant and Young Child Feeding in Emergencies*. 2015 December 2015.
- 593 3. Campbell S. Global challenges in protecting and promoting breastfeeding. *Prim Health*  
594 *Care*. 2008;18(1):41-48.
- 595 4. Sinha B, Chowdhury R, Sankar MJ, Martines J, Taneja S, Mazumder S, et al. Interventions to  
596 improve breastfeeding outcomes: a systematic review and meta-analysis. *Acta paediatrica (Oslo,*  
597 *Norway : 1992)*. 2015;104(467):114-34.
- 598 5. Victora CG, Bahl R, Barros AJD, França GVA, Horton S, Krasevec J, et al. Breastfeeding in the  
599 21st century: epidemiology, mechanisms, and lifelong effect. *The Lancet*. 2016;387(10017):475-  
600 90.
- 601 6. O'Connor ME, Burkle FM, Jr., Olness K. Infant feeding practices in complex emergencies: a  
602 case study approach. *Prehosp Disaster Med*. 2001;16(4):231-8.
- 603 7. Essential nutrition actions: mainstreaming nutrition through the life-course. Geneva: World  
604 Health Organization; 2019. Licence: CC BY-NC-SA 3.0 IGO.
- 605 8. Davanzo R. Newborns in adverse conditions: issues, challenges, and interventions. *J*  
606 *Midwifery Womens Health* 2004;49(4 Suppl 1):29-35.
- 607 9. Alsamman S. Managing infant and young child feeding in refugee camps in Jordan. *ENN*  
608 [Internet]. 2014 Nov [cited 2019 Apr 17]; (48):85. Available form:  
609 <https://www.ennonline.net/fex/48/managinginfant>.
- 610 10. Maclaine A. Infant feeding in emergencies: experiences from Lebanon. 2007. Contract No.:  
611 37.
- 612 11. Bustreo F, Genovese E, Omobono E, Axelsson H, Bannon I. Improving child health in post-  
613 conflict countries: Can the World Bank contribute. The World Bank. 2005.
- 614 12. Seal A, Taylor A, Gostelow L, McGrath M. Review of policies and guidelines on infant  
615 feeding in emergencies: common ground and gaps. *Disasters*. 2001;25(2):136-48.
- 616 13. Ploughshares P. *Armed Conflict 2016* [Available from: [http://ploughshares.ca/armed-](http://ploughshares.ca/armed-conflict/defining-armed-conflict/)  
617 [conflict/defining-armed-conflict/](http://ploughshares.ca/armed-conflict/defining-armed-conflict/)].
- 618 14. Bank W. *New country classifications by income level: 2018-2019.*; 2018 2018.
- 619 15. Clarivate. *Endnote*. In: Group WoS, editor. 7.8 ed2019.
- 620 16. Dozio E, Peyre L, Morel SO, Bizouerne C, Black. Integrated psychosocial and food security  
621 approach in an emergency context: Central African Republic. *Intervention: Journal of Mental*  
622 *Health and Psychosocial Support in Conflict Affected Areas*. 2016;14(3):257-71.
- 623 17. Fander G, Frega M. Responding to nutrition gaps in Jordan in the Syrian Refugee Crisis:  
624 *Infant and Young Child Feeding education and malnutrition treatment*. *ENN [Internet]*. 2014 Nov  
625 [cited 2019 Apr 17]; (48): 82. Available from: <https://www.ennonline.net/fex/48/responding>.
- 626 18. Ndungu P, Tanaka J. Using care groups in emergencies in South Sudan. *ENN [Internet]*.  
627 2017 Feb [cited 2019 Apr 17]; (54): 95. Available from:  
628 <https://www.ennonline.net/fex/54/emergenciesinsouthsudan>.
- 629 19. Aakre I, Lilleengen AM, Aarsand ML, Strand TA, Barikmo I, Henjum S. Infant feeding  
630 practices in the Saharawi refugee camps Algeria, a cross-sectional study among children from birth  
631 to six months of age. *International breastfeeding journal*. 2016;12(1):8.

- 1  
2  
3 632 20. Jakobsen M, Sodemann M, Nylen G, Bale C, Nielsen J, Lisse I, et al. Breastfeeding status as  
4 633 a predictor of mortality among refugee children in an emergency situation in Guinea-Bissau. *Trop*  
5 634 *Med Int Health*. 2003;8(11):992-6.
- 6 635 21. Robertson A, Fronczak N, Jaganjac N, Hailey P, Copeland P, Duprat M. Nutrition and  
7 636 immunization survey of Bosnian women and children during 1993. *Int J Epidemiol*.  
8 637 1995;24(6):1163-70.
- 9 638 22. Summers A, Bilukha OO. Suboptimal infant and young child feeding practices among  
10 639 internally displaced persons during conflict in eastern Ukraine. *Public Health Nutr*. 2018;21(5):917-  
11 640 26.
- 12 641 23. Theurich MA, Grote V. Are commercial complementary food distributions to refugees and  
13 642 migrants in Europe conforming to international policies and guidelines on infant and young child  
14 643 feeding in emergencies? *Journal of Human Lactation*. 2017;33(3):573-7.
- 15 644 24. Andersson N, Paredes-Solis S, Legorreta-Soberanis J, Cockcroft A, Sherr L. Breast-feeding in  
16 645 a complex emergency: four linked cross-sectional studies during the Bosnian conflict. *Public health*  
17 646 *nutrition*. 2010;13(12):2097-104.
- 18 647 25. Šumanović-Glamuzina D. Breastfeeding practice in Bosnia and Herzegovina. *Journal of*  
19 648 *Pediatric and Neonatal Individualized Medicine (JPNIM)*. 2013;2(1):55-62.
- 20 649 26. Diwakar V, Malcolm M, Naufal G. Violent Conflict and Breastfeeding: The Case of Iraq.  
21 650 2017.
- 22 651 27. Darjani P, Berbari LS. Infant and young child feeding support in Lebanon: strengthening the  
23 652 national system. *ENN [Internet]*. 2014 Nov [cited 2019 Apr 17]; (48):20. Available from:  
24 653 <https://www.ennonline.net/fex/48/infant>.
- 25 654 28. Seguin J. Challenges of IYCF and psychosocial support in Lebanon. *ENN [Internet]*. 2014 Nov  
26 655 [cited 2019 Apr 17]; (48): 24. Available from: <https://www.ennonline.net/fex/48/challenges>.
- 27 656 29. Khudari WHO response to malnutrition in Syria: a focus on surveillance, case detection and  
28 657 clinical management. *ENN [Internet]*. 2014 Nov [cited 2019 Apr 17]; (48): 118. Available from:  
29 658 <https://www.ennonline.net/fex/48/whosyria>.
- 30 659 30. UNHCR. UNHCR Nutrition Survey among Afghan Refugees Residing in Afghan Refugee  
31 660 Villages of Pakistan. 2014.
- 32 661 31. Sallam AK, Albably K, Zvandaziva C, Singh K. Community engagement through local  
33 662 leadership: Increasing access to nutrition services in a conflict setting in Yemen. *ENN [Internet]*.  
34 663 2018 Jan [cited 2019 Apr 17]; (9):10. Available from:  
35 664 <https://www.ennonline.net/nex/9nutserviceaccessyemen>.
- 36 665 32. Bile KM, Hafeez A, Kazi GN, Southall D. Protecting the right to health of internally displaced  
37 666 mothers and children: the imperative of inter-cluster coordination for translating best practices  
38 667 into effective participatory action. *Eastern Mediterranean Health Journal*. 2011;17(12):981-9.
- 39 668 33. Amelia Reese Masterson, Shiromi M. Perera, Moghames P. Camp-based Barrier Analysis of  
40 669 Early Initiation of Breastfeeding, Iron-rich Food Consumption, and Early Antenatal Care Seeking  
41 670 Behaviors of Syrian Refugees in Azraq Camp, Jordan. *International Medical Corps USAID*; 2016.
- 42 671 34. Prudhon C. Assessment of Infant and Young Child Feeding Practices among Refugees on  
43 672 Lesvos Island, Greece 2016.
- 44 673 35. Hunger AA. Infant Feeding and Weaning Report 2000.
- 45 674 36. Mary S Lung'aho, Stone-Jiménez M. Mother-to-Mother Support Groups in the Dadaab  
46 675 Refugee Camps.

- 1  
2  
3 676 37. Children St. Emergency WASH & Nutrition for conflict affected people in Yemen – Taiz  
4 677 governorate. 2017.  
5  
6 678 38. WHO. Indicators for assessing infant and young child feeding practices. 2008.  
7 679 39. Mukunya D, Tumwine JK, Nankabirwa V, Ndeezi G, Odongo I, Tumuhamy J, et al. Factors  
8 680 associated with delayed initiation of breastfeeding: a survey in Northern Uganda. *Glob Health*  
9 681 *Action*. 2017;10(1):1410975.  
10 682 40. Holland R. Frontline: Support for breastfeeding in crisis. *Lancet*. 2017;390(10097):834.  
11 683 41. Renata Jelušić R. Support for breastfeeding and young child feeding in emergencies.  
12 684 Experiences gained during the migrant and refugee crisis in Croatia in 2015 and 2016. 2017.  
13 685 42. Program WIEPoB. Infant and Young Child Feeding in Emergency Situations. 2005.  
14 686 43. Saraswati Khalsa EH, Eric Sarriot. Systems Effects Of Save The Children Emergency Health &  
15 687 Projects Sudan. 2019.  
16 688 44. USAID Core Group members. Humanitarian Development Nexus Stakeholder and  
17 689 Literature Analysis. 2019.  
18 690 45. WHO. Guiding principles for feeding infants and young children during emergencies. 2004.  
19 691 46. Group IC. Infant and Young Child Feeding in Emergencies Operational Guidance for  
20 692 Emergency Relief Staff and Programme Managers. 2017 October 2017.  
21 693 47. Focus I. The Code and infant feeding in emergencies. 2009 May 2009.  
22 694 48. Machel G. Impact of Armed Conflict on Children. United Nations; 1996 26 August 1996.  
23 695 49. Association ILC. Breastfeeding: A Vital Emergency Response. Are You Ready? . 2009.  
24 696 50. Association ILC. Breastfeeding: A Vital Emergency Response. Are You Ready? For relief  
25 697 workers. 2009.  
26 698 51. WHO. International Code of Marketing of Breast-milk Substitutes. Geneva; 1981.  
27 699 52. OXFAM. Feeding in Emergencies For Infants Under Six Months: Practical Guidelines 1996.  
28 700 53. WHO, UNICEF, LINKAGES, IBFAN, ENN. Infant feeding in emergencies Module 1 (for  
29 701 emergency relief staff). 2001 November 2001.  
30 702 54. WHO. WHA RESOLUTION 47.5- Infant and young child nutrition. 1994.  
31 703 55. Joint UNICEF U, WFP, WHO Statement Policy on infant feeding in the Balkan Region.  
32 704 56. UNHCR. UNHCR Policy Related To The Acceptance, Distribution And Use Of Milk Products  
33 705 In Refugee Settings 2006.  
34 706 57. UNHCR. Guidance on Infant feeding and HIV in the context of refugees and displaced  
35 707 populations. 2008 April 2008.  
36 708 58. UNHCR. Infant and young child feeding practices- Standard Operating Procedures for the  
37 709 Handling of Breastmilk Substitutes (BMS) in Refugee Situations for children 0-23 months. 2015  
38 710 August 2015.  
39 711 59. UNHCR, children St. Infant and Young Child Feeding in Refugee Situations: A Multi-Sectoral  
40 712 Framework for Action. 2018 May, 2018.  
41 713 60. ACF-International. Baby friendly spaces. Holistic approach for Pregnant, Lactating Women  
42 714 and their very young children in Emergency. 2014 December 2014.  
43 715 61. ENN, IBFAN-GIFA, Fondation Terre des hommes, Action Contre la Faim, CARE USA,  
44 716 LINKAGES, et al. Infant feeding in emergencies (for health and nutrition workers in emergency  
45 717 situations). 2007.  
46 718 62. Refugees UHCf. Interim Operational Considerations for the feeding support of Infants and  
47 719 Young Children under 2 years of age in refugee and migrant transit settings in Europe. 2015.  
48  
49  
50  
51  
52  
53  
54  
55  
56  
57  
58  
59  
60

- 1  
2  
3 720 63. Save the Children U, Food Security and Nutrition Network. IYCF-E Toolkit: Summary of  
4 721 Operational Guidance on IYCF-E Key Points and WHA Resolution. 2007.  
5 722 64. Save the Children U, Food Security and Nutrition Network. IYCF-E Toolkit: Summary of  
6 723 Feeding the Non-breastfed child 6- 24 months of Age 2007.  
7 724 65. Pediatrics AAO. Infant feeding in disasters and emergencies. 2015.  
8 725 66. UNICEF. UNICEF Guidance on the provision and use of breastmilk substitutes in  
9 726 humanitarian settings. 2018 June 2018.  
10 727 67. UNHCR. HOW TO GUIDE reproductive health in refugee setting (Strengthening Safe  
11 728 Motherhood Services). 1999 November 1998.  
12 729 68. ENN. Infant Feeding in Emergencies: Policy, Strategy and Practice. 1999 May 1999.  
13 730 69. McGrath M, Seal A, Taylor A, Gostelow L. Meeting the nutritional needs of infants during  
14 731 emergencies: Recent experiences and dilemmas: Report of an international workshop, Institute of  
15 732 Child Health, London, November 1999. 2000.  
16 733 70. Prudhon C, Benelli P, Maclaine A, Harrigan P, Frize J. Informing infant and young child  
17 734 feeding programming in humanitarian emergencies: An evidence map of reviews including low  
18 735 and middle income countries. *Matern Child Nutr.* 2018;14(1).  
19 736 71. Aguayo VM, Ross JS, Kanon S, Ouedraogo AN (2003) Monitoring compliance with the  
20 737 International Code of Marketing of Breastmilk Substitutes in west Africa: multisite cross sectional  
21 738 survey in Togo and Burkina Faso. *British Medical Journal.* 326, 127.  
22 739  
23  
24  
25  
26  
27  
28 740

1  
2  
3  
4  
5  
6  
7  
8  
9  
10  
11  
12  
13  
14  
15  
16  
17  
18  
19  
20  
21  
22  
23  
24  
25  
26  
27  
28  
29  
30  
31  
32  
33  
34  
35  
36  
37  
38  
39  
40  
41  
42  
43  
44  
45  
46  
47  
48  
49  
50  
51  
52  
53  
54  
55  
56  
57  
58  
59  
60

741 **Figures and Tables**

- 742 Table 1: IYCF practices in conflict settings
- 743 Table 2: Programs/ Interventions to Promote Optimal IYCF Practices
- 744 Figure 1: Conceptual Framework
- 745 Figure 2: Search Flow Diagram
- 746 Figure 3: Barriers to optimal breastfeeding practices
- 747 Figure 4: Implementation Guidelines

For peer review only

**TABLES****Table 1: IYCF practices in conflict settings**

|                        | Indicators                                                                                   | Target Population: Country                                                                                                                                                                                               | Setting                                                                                                                                                                | Estimates<br>Median (range) | Sample size<br>Median (range) | Scale                                                                                             |
|------------------------|----------------------------------------------------------------------------------------------|--------------------------------------------------------------------------------------------------------------------------------------------------------------------------------------------------------------------------|------------------------------------------------------------------------------------------------------------------------------------------------------------------------|-----------------------------|-------------------------------|---------------------------------------------------------------------------------------------------|
| <b>Core Indicators</b> | Early Initiation of Breastfeeding (n=10) <sup>16, 18, 19, 22, 25, 28, 30, 33, 36, 37</sup>   | - IDPs: South Sudan, Ukraine<br>- Refugees: Algeria, Jordan, Kenya, Lebanon, Pakistan<br>- Not Specified: Bosnia-Herzegovina, CAR, Yemen                                                                                 | - Camp: Algeria, Jordan, Kenya, Lebanon<br>- Community: Pakistan, South Sudan, Ukraine, Yemen                                                                          | 51% (31.3% to 85%)          | 357 (111-1368)                | - Camps: Algeria, Jordan, Kenya<br>- Village: Pakistan<br>- District: Yemen<br>- National: CAR    |
|                        | Exclusive breastfeeding under 6 months (n=16) <sup>11, 18, 19, 21-23, 25-28, 30, 33-37</sup> | - IDPs: Bosnia-Herzegovina, Ukraine, Sierra Leone, South Sudan<br>- Refugees: Algeria, Greece, Jordan, Kenya, Lebanon, Pakistan<br>- Not Specified: Afghanistan, Bosnia-Herzegovina, Iraq, Kosovo, Lebanon, Syria, Yemen | - Camp: Algeria, Kenya, Lebanon<br>- Community: Bosnia-Herzegovina, Iraq, Kosovo, Pakistan, South Sudan, Ukraine, Yemen<br>- Community and Healthcare Facility: Jordan | 25% (5.5% to 77.1%)         | 432 (58-250,000)              | - Camps: Algeria, Jordan, Kenya<br>- Village: Pakistan<br>- District: Yemen<br>- National: Kosovo |
|                        | Continued Breastfeeding at one years (n=7) <sup>22, 25, 28, 30, 34, 36, 37</sup>             | - IDPs: Ukraine<br>- Refugees: Greece, Kenya, Lebanon, Pakistan<br>- Not Specified: Bosnia-Herzegovina, Yemen                                                                                                            | - Camp: Kenya, Lebanon<br>- Community: Pakistan, Ukraine, Yemen                                                                                                        | 57.20% (8.5% to 78.2%)      | 326 (38-1368)                 | - Camp: Kenya<br>- Village: Pakistan<br>- District: Yemen                                         |
|                        | Introduction of Solid, Semi Solid or Soft Food (n=6) <sup>19, 22, 25, 30, 34, 36</sup>       | - IDPs: Ukraine<br>- Refugees: Algeria, Greece, Kenya, Pakistan<br>- Not Specified: Bosnia-Herzegovina,                                                                                                                  | - Camp: Algeria, Kenya<br>- Community: Pakistan, Ukraine                                                                                                               | 71.05% (40.7% to 98.6%)     | 477 (111-1368)                | - Camps: Algeria, Kenya<br>- Village: Pakistan                                                    |
|                        | Minimum Dietary Diversity (n=5) <sup>16, 18, 30, 34, 37</sup>                                | - IDPs: South Sudan<br>- Refugees: Greece, Pakistan<br>- Not Specified: CAR, Yemen                                                                                                                                       | - Community: Pakistan, South Sudan<br>Yemen                                                                                                                            | 60.25% (9.2% to 79.4%)      | 309 (148-1055)                | - Village: Pakistan<br>- District: Yemen<br>- National: CAR                                       |
|                        | Minimum Meal Frequency (n=6) <sup>16, 18, 22, 30, 34, 37</sup>                               | - IDPs: South Sudan, Ukraine<br>- Refugees: Greece, Pakistan<br>- Not Specified: CAR, Yemen                                                                                                                              | - Community: Pakistan, South Sudan, Ukraine, Yemen                                                                                                                     | 58% (58% to 97.6%)          | 432 (148-1055)                | - Village: Pakistan<br>- District: Yemen<br>- National: CAR                                       |

|                            |                                                                              |                                                                                                                                 |                                                                                      |                         |                        |                                                                            |
|----------------------------|------------------------------------------------------------------------------|---------------------------------------------------------------------------------------------------------------------------------|--------------------------------------------------------------------------------------|-------------------------|------------------------|----------------------------------------------------------------------------|
|                            | Minimum Acceptable Diet (n=5) <sup>16, 18, 30, 34, 37</sup>                  | - IDPs: South Sudan<br>- Refugees: Greece, Pakistan<br>- Not Specified: CAR, Yemen                                              | - Community: Pakistan, South Sudan, Yemen                                            | 24.95% (30.5% to 33%)   | 309 (148-1055)         | - Village: Pakistan<br>- District: Yemen<br>- National: CAR                |
|                            | Consumption of Iron Rich and Iron Fortified Food (n=2) <sup>22, 33</sup>     | - IDPs: Ukraine<br>- Refugees: Jordan                                                                                           | - Camp: Jordan<br>- Community: Ukraine                                               | 51.61% (29% to 84.7%)   | 379 (281-477)          | - Camp: Jordan                                                             |
| <b>Optional Indicators</b> | Children ever breastfed (n=5) <sup>22, 24, 30, 34, 35</sup>                  | - All (refugees, displaced and not displaced): Bosnia-Herzegovina<br>- IDPs: Ukraine<br>- Refugees: Greece, Macedonia, Pakistan | - Camp: Macedonia<br>- Community: Bosnia-Herzegovina, Pakistan, Ukraine              | 92% (62.8% to 98.4%)    | 766 (148-1123)         | - Camp: Macedonia<br>- Village: Pakistan<br>- National: Bosnia-Herzegovina |
|                            | Continued Breastfeeding at two years (n=6) <sup>22, 25, 26, 28, 30, 34</sup> | - IDPs: Ukraine<br>- Refugees: Lebanon, Pakistan, Greece<br>- Not Specified: Bosnia-Herzegovina, Iraq                           | - Camp: Lebanon<br>- Community: Iraq, Pakistan, Ukraine                              | 29% (9% to 66%)         | 477 (148- 55194)       | - Village: Pakistan<br>- National: Iraq                                    |
|                            | Age appropriate breastfeeding (n=3) <sup>25, 30, 34</sup>                    | - Refugees: Greece, Pakistan<br>- Not Specified: Bosnia-Herzegovina                                                             | - Community: Pakistan                                                                | 43.20% (19.5% to 77.8%) | 602 (148-1055)         | - Village: Pakistan                                                        |
|                            | Predominant breastfeeding under 6 months (n=5) <sup>19, 25, 30, 34, 35</sup> | - Refugees: Algeria, Greece, Pakistan<br>- Not Specified: Bosnia-Herzegovina, Kosovo                                            | - Camp: Algeria<br>- Community: Kosovo, Pakistan                                     | 31.30% (7.1% to 77.30%) | 176 (111-1055)         | - Village: Pakistan                                                        |
|                            | Duration of breastfeeding (n=2) <sup>20, 24</sup>                            | - All (refugees, displaced and not displaced): Bosnia-Herzegovina<br>- IDPs: Guinea-Bissau                                      | - Community: Bosnia-Herzegovina, Guinea-Bissau                                       | 22.7 months             | 2149 (1741-2556)       | - City: Guinea-Bissau<br>- National: Bosnia-Herzegovina                    |
|                            | Bottle feeding (n=3) <sup>22, 28, 30</sup>                                   | - IDPs: Ukraine<br>- Refugees: Lebanon, Pakistan                                                                                | - Camp: Lebanon<br>- Community: Pakistan, Ukraine                                    | 58.30% (31.8% to 71.4%) | 477 (174-1055)         | - Village: Pakistan                                                        |
|                            | Milk feeding frequency of non-breastfed children (n=1) <sup>34</sup>         | - Refugees: Greece                                                                                                              | - Not Stated                                                                         | 33.90%                  | 148                    | - Not Stated                                                               |
| <b>Malnutrition</b>        | Underweight (n=4) <sup>11, 19, 30, 37</sup>                                  | - IDPs: Afghanistan, Sierra Leone<br>- Refugees: Algeria, Pakistan<br>- Not Specified: East Timor, Yemen                        | - Camp: Algeria<br>- Community: Pakistan, Yemen                                      | 33.10% (12.01% to 48%)  | 1055 (111-250,000)     | - Camp: Algeria<br>- Village: Pakistan<br>- District: Yemen                |
|                            | Acute Malnutrition (n=3) <sup>11, 22, 32</sup>                               | - All ((IDPs, refugees and residents): Southern Somalia<br>- IDPs: Ukraine, Pakistan                                            | - Camp: Southern Somalia, Ukraine<br>- Camps, hospitals and mobile clinics: Pakistan | 30.10% (0.5% to 81%)    | 80,000 (477-3,000,000) | - Camps and Healthcare facilities: Pakistan                                |



|                      |                                                                                |                                                                                                                                                                   |                                                                                                           |                       |                           |                                                                                            |
|----------------------|--------------------------------------------------------------------------------|-------------------------------------------------------------------------------------------------------------------------------------------------------------------|-----------------------------------------------------------------------------------------------------------|-----------------------|---------------------------|--------------------------------------------------------------------------------------------|
|                      | GAM (n=7) <sup>9, 16, 18, 30, 31, 36, 37</sup>                                 | - IDPs: South Sudan<br>- Refugees: Jordan, Kenya, Pakistan<br>- Not Specified: CAR, Yemen                                                                         | - Camp: Jordan, Kenya<br>- Community: Pakistan, South Sudan, Yemen                                        | 9.95% (2.6% to 25.1%) | 498 (208-1368)            | - Camp: Jordan, Kenya<br>- Village: Pakistan, Yemen<br>- District: Yemen                   |
|                      | MAM (n=9) <sup>11, 17-19, 21, 22, 30, 37, 43</sup><br>(Z- score <-2 to <-3 SD) | - IDPs: Afghanistan, Bosnia-Herzegovina, Sierra Leone, South Sudan, Sudan, Ukraine<br>- Refugees: Algeria, Jordan, Pakistan<br>- Not Specified: East Timor, Yemen | - Camp: Algeria, Ukraine<br>- Community: Bosnia- Herzegovina, Jordan, Pakistan, South Sudan, Sudan, Yemen | 4.0% (0.27 to 25%)    | 563 (111-250,000)         | - Camp: Algeria<br>- Village: Pakistan<br>- District: Yemen<br>- Governorates: Jordan      |
|                      | SAM (n=8) <sup>16-18, 30, 31, 36, 37, 43</sup><br>(Z- score <-3 SD)            | - IDPs: South Sudan, Sudan<br>- Refugees: Jordan, Kenya, Pakistan<br>- Not Specified: CAR, Yemen                                                                  | - Camp: Kenya<br>- Community: Jordan, Pakistan, South Sudan, Sudan, Yemen                                 | 1.50% (0.15% to 5.3%) | 809 (208-46,383)          | - Camp: Kenya<br>- Village: Pakistan, Yemen<br>- District: Yemen<br>- Governorates: Jordan |
| Chronic Malnutrition | Stunting (n=7) <sup>11, 16, 18, 19, 30, 31, 37</sup>                           | - IDPs: Afghanistan, Sierra Leone, South Sudan<br>- Refugees: Algeria, Pakistan<br>- Not Specified: East Timor, CAR, Yemen                                        | - Camp: Algeria<br>- Community: Pakistan, South Sudan, Yemen                                              | 38.60% (13.6% to 53%) | 432 (111-1055)            | - Camp: Algeria<br>- Village: Pakistan, Yemen<br>- District: Yemen                         |
|                      | Overweight (n=1) <sup>30</sup>                                                 | - Refugees: Pakistan                                                                                                                                              | - Community                                                                                               | 18.1%                 | 1055                      | - Village                                                                                  |
|                      | Anemia (n=1) <sup>30</sup>                                                     | - Refugees: Pakistan                                                                                                                                              | - Community                                                                                               | 23.2%                 | 1055                      | - Village                                                                                  |
| Other Indicators     | Diarrhea Prevalence (n=3) <sup>11, 32, 37</sup>                                | - IDPs: Guatemala, Pakistan<br>- Not Specified: Yemen                                                                                                             | - Camps, hospital and mobile clinics: Pakistan<br>- Community: Yemen                                      | 30% (28.9% -73.8%)    | 303 (42-563)              | - Healthcare facilities: Pakistan<br>- District: Yemen                                     |
|                      | Mortality due to Diarrhea (n=3) <sup>11, 21, 30</sup>                          | - IDPs: Bosnia-Herzegovina, Somalia<br>- Refugees: Iraq, Nepal, Pakistan, Uganda, Zaire<br>- Residents: Eastern DRC                                               | - Camps: Southern Somalia<br>- Community: Bosnia-Herzegovina, Pakistan                                    | 39% (22.3% to 87%)    | 100, 000 (1055-3,000,000) | - Village: Pakistan                                                                        |



**Table 2: Programs/ Interventions to Promote Optimal IYCF Practices**

| Program                                                                                                            | Target Population/<br>Countries                                                                          | Setting                                                                                                                                                          | Health Workforce Involved                                                                                                                                                                             | Program/ Intervention Details                                                                                                                                                                                                                                                                                                                                                 | Outcomes                                                                                                                                                                                                                                                                                                                                                                                                                                                                                                                                                                                                                                                                                                                                                                                                                                                                                                                                                                            |
|--------------------------------------------------------------------------------------------------------------------|----------------------------------------------------------------------------------------------------------|------------------------------------------------------------------------------------------------------------------------------------------------------------------|-------------------------------------------------------------------------------------------------------------------------------------------------------------------------------------------------------|-------------------------------------------------------------------------------------------------------------------------------------------------------------------------------------------------------------------------------------------------------------------------------------------------------------------------------------------------------------------------------|-------------------------------------------------------------------------------------------------------------------------------------------------------------------------------------------------------------------------------------------------------------------------------------------------------------------------------------------------------------------------------------------------------------------------------------------------------------------------------------------------------------------------------------------------------------------------------------------------------------------------------------------------------------------------------------------------------------------------------------------------------------------------------------------------------------------------------------------------------------------------------------------------------------------------------------------------------------------------------------|
| Capacity Building and Program-Strengthening Projects for Health Workers (n=7) <sup>9, 17, 27, 29, 36, 40, 43</sup> | - IDPs: Sudan, Syria<br>- Refugees: Jordan, Kenya, Lebanon<br>- Not Specified: Greece, Iraq              | - Camps: Jordan<br>- Fixed and mobile clinics: Jordan, Lebanon                                                                                                   | - Trained Physician (doctors, nurses)<br>- Paramedic Staff (midwives, TBAs)<br>- Community Workers (facility and community based IYCF counsellors, local reproductive health worker)                  | - Training sessions on IYCF<br>- Malnutrition screening and treatment<br>- Continuous follow up and co-ordination                                                                                                                                                                                                                                                             | <b>Coverage of Training:</b><br>- In Lebanon and Syria: >190 doctors and health workers <sup>27, 29</sup>                                                                                                                                                                                                                                                                                                                                                                                                                                                                                                                                                                                                                                                                                                                                                                                                                                                                           |
| Education and Awareness Activities for Mothers (n=7) <sup>9, 16, 17, 27, 28, 32, 36</sup>                          | -IDPs: Pakistan<br>-Refugees: Jordan, Kenya, Lebanon<br>-Not specified: CAR                              | - Camps: Jordan, Kenya, Lebanon, Pakistan<br>- Community: CAR, Lebanon<br>- Fixed and mobile clinics: Jordan, Pakistan<br>- Healthcare facility: Jordan Pakistan | - Trained Physician (lactation specialists)<br>- Community Workers (Nutrition officer, IYCF educator and a community mobiliser)                                                                       | - Counselling sessions on optimal IYCF-E practices<br>- Educational materials and counselling cards distributed<br>- Sensitizations on childcare practices and cooking demonstrations given to PLW<br>- Distribution of hygiene and baby kits (soaps, blankets, baby spoons, and cups for children), and bangles for mothers                                                  | <b>Coverage of IYCF Counselling</b><br>- In Jordan: 30-40 mothers counselled/day <sup>9</sup> ; 4,690 PLWs and 919 mothers counselled in 10 months <sup>17</sup><br>- In Lebanon: 10,000 mothers were counselled in one year <sup>27</sup><br>- In CAR: 758/900 (84.2%) PLW participated <sup>16</sup>                                                                                                                                                                                                                                                                                                                                                                                                                                                                                                                                                                                                                                                                              |
| Community Networking and Mobilization (n=8) <sup>9, 17, 18, 27, 31, 36, 40, 43</sup>                               | - IDPs: South Sudan, Sudan<br>- Refugees: Jordan, Kenya, Lebanon<br>- Not Specified: Greece, Iraq, Yemen | - Camps: Jordan, Kenya<br>- Community: Lebanon, South Sudan, Sudan, Yemen                                                                                        | - Community Workers (refugee mothers, community leaders, 'leader mothers' (mothers trained by promotors to teach neighbor women), and 'neighbor women' (chosen by community) as community mobilisers) | - Training of community mobilizers by IYCF counsellors, educators, 'promotors', program supervisors and IYCF coordinators on IYCF and the importance of exclusive breastfeeding, nutrition<br>- Dissemination of messages among mothers through household visits, demonstrations and information sharing within care groups<br>- Screening and referring malnourished mothers | <b>Coverage of Health Workers Training:</b><br>- In South Sudan, 320 'leader mothers' trained IYCF <sup>18</sup><br><b>Coverage of IYCF Counselling</b><br>- In Jordan: 4,977 PLWs and 31,485 caregivers in 10 months <sup>17</sup><br>- In South Sudan: 320 neighborhood groups, reaching 3,832 women <sup>18</sup><br>- In Yemen, 50-60% increase in awareness of mothers/caregivers on nutritious food along with an increase in utilization of local foods for preparing nutritious meals for infants <sup>31</sup><br><b>Mass Screening and SAM/MAM Treatment</b><br>- In Yemen: 90% of children <2 years screened for SAM and MAM, 2,563 children were treated for SAM, reduction in number of cases of SAM and MAM children; zero cases of SAM (MUAC <115mm) in 13/68 model villages by the end of the project <sup>31</sup><br>- In Sudan: 150,617 children screened for malnutrition <sup>43</sup><br>- In Yemen: Reduction in bottle feeding to almost zero <sup>31</sup> |
| Mother Baby Friendly Spaces and Mother to Mother Support                                                           | - IDPs: South Sudan, Sudan                                                                               | - Camps: Albania, Kenya, Lebanon<br>- Caravans: Jordan                                                                                                           | - Trained Physician: Pediatrician, lactation consultant<br>- Community Workers: Relief workers, psychosocial workers, pediatrician,                                                                   | - Construction of Mother-baby friendly spaces, caravans and mother baby center for counselling and 24-hour support                                                                                                                                                                                                                                                            | <b>Coverage of IYCF counselling in baby friendly spaces and mother-to- mother support groups:</b><br>- In Jordan: 15,600 mothers in 18 months in Jordan <sup>9</sup><br>- In Kenya: 581 facilitators trained in IYCF <sup>36</sup>                                                                                                                                                                                                                                                                                                                                                                                                                                                                                                                                                                                                                                                                                                                                                  |

|                                                                                                                                                                                                                                                                                                                                                                        |                                                                                      |                                                                                                            |                                                                                                                         |                                                                                                                                                                                                                                                                                                                                                                                                         |                                                                                                                                                                                                                                                                                                                                                                                                                                |
|------------------------------------------------------------------------------------------------------------------------------------------------------------------------------------------------------------------------------------------------------------------------------------------------------------------------------------------------------------------------|--------------------------------------------------------------------------------------|------------------------------------------------------------------------------------------------------------|-------------------------------------------------------------------------------------------------------------------------|---------------------------------------------------------------------------------------------------------------------------------------------------------------------------------------------------------------------------------------------------------------------------------------------------------------------------------------------------------------------------------------------------------|--------------------------------------------------------------------------------------------------------------------------------------------------------------------------------------------------------------------------------------------------------------------------------------------------------------------------------------------------------------------------------------------------------------------------------|
| <p>Groups (n=10)<sup>9, 11, 16-18, 27, 28, 36, 41, 43</sup></p>                                                                                                                                                                                                                                                                                                        | <p>- Refugees: Albania, Croatia, Jordan, Kenya, Lebanon<br/>- Not Specified: CAR</p> | <p>- Community: South Sudan, Sudan<br/>- Containers: Croatia<br/>- Primary healthcare centers: Lebanon</p> | <p>lactation consultant, IYCF counsellors, and community mobilisers</p>                                                 | <p>- Formation of mother to mother/caregiver support groups<br/>- Distribution of high energy biscuit, a bottle of water, and shawls for privacy<br/>- Distribution of food vouchers to mothers for nutritional security and psychological support<br/>- Screening of children for malnutrition</p>                                                                                                     | <p>- In CAR: 199 mothers/ caregivers given psychosocial support<sup>16</sup><br/><b>Other Outcomes:</b><br/>- In Jordan: 120-150 mothers/day visited baby friendly spaces in Jordan<sup>9</sup><br/>- In Jordan: 50 women attended support group gatherings<sup>17</sup><br/>- In Sudan: 14,272 infant/ mother pairs attended MtMSG<sup>43</sup><br/>- In Kenya: 713 MtMSG (2801 mothers/caregivers in MtMSG)<sup>36</sup></p> |
| <p>Lactation Support Service (n=3)<sup>11, 17, 27</sup></p>                                                                                                                                                                                                                                                                                                            | <p>- Refugees: Albania, Jordan, Lebanon,</p>                                         | <p>- Camps: Albania, Jordan<br/>- Community: Lebanon</p>                                                   | <p>- Trained Physician (Lactation specialists, obstetrician/gynecologist)<br/>- Paramedic Staff (midwives)</p>          | <p>- Assist mothers for re-lactation and in breastfeeding difficulties (painful nursing, latching problems, low breast milk production, and on correct positioning for feeding)</p>                                                                                                                                                                                                                     | <p><b>Coverage of counselling:</b><br/>- In Lebanon: 3,150 mothers in 6 months<sup>27</sup></p>                                                                                                                                                                                                                                                                                                                                |
| <p>Baby Friendly Hospital Initiative (n=2)<sup>25, 27</sup></p>                                                                                                                                                                                                                                                                                                        | <p>- Refugees: Lebanon<br/>- Not Specified: Bosnia-Herzegovina</p>                   | <p>- Camps: Lebanon</p>                                                                                    | <p>- Not Specified</p>                                                                                                  | <p>- Labelling of maternity wards as “baby-friendly” to support breastfeeding<br/>- Capacity building of health workforce<br/>- Provision of tools and equipment to support breastfeeding, reducing use of BMS</p>                                                                                                                                                                                      | <p>In Bosnia-Herzegovina, from 1997-1999:<br/>- Predominant breastfeeding increased from 64.3% to 77.3%<br/>- Continued breastfeeding at 2 years increased from 8.5% to 40.7%</p>                                                                                                                                                                                                                                              |
| <p>Breast Milk Substitutes (n=5)<sup>9, 17, 27, 28, 40</sup></p>                                                                                                                                                                                                                                                                                                       | <p>- Refugees: Jordan, Lebanon<br/>- Not Specified: Greece, Iraq</p>                 | <p>- Camps: Greece, Iraq, Jordan and Lebanon</p>                                                           | <p>- Trained Physician (lactation specialists, and obstetrician/ gynecologist)<br/>- Paramedic Staff (IYCF midwife)</p> | <p>- Training of healthcare staff and mothers on artificial feeding<br/>- Counselling of mothers on importance of breastfeeding, appropriate use of infant formula and on adverse effects of artificial feeding on infant’s health<br/>- Monitor and control the distribution of infant formula- - Provision of BMS supplies and kits (cups and clean water) for safe preparation of infant formula</p> | <p>- In Lebanon: 50 infants were assisted with artificial feeding support<sup>27</sup><br/>- In Jordan: Seven mothers received artificial milk supplies<sup>9</sup></p>                                                                                                                                                                                                                                                        |
| <p><b>Key:</b> Breast Milk Substitutes (BMS); Internally Displaced Persons (IDPs); Infant and Young Child Feeding (IYCF); Infant and Young Child Feeding in Emergencies (IYCF-E); Traditional Birth Attendants (TBAs), Pregnant and Lactating Women (PLWs); Exclusive Breastfeeding (EBF); Central African Republic (CAR), Mother to mother support groups (MtMSG)</p> |                                                                                      |                                                                                                            |                                                                                                                         |                                                                                                                                                                                                                                                                                                                                                                                                         |                                                                                                                                                                                                                                                                                                                                                                                                                                |

1  
2  
3  
4  
5  
6  
7  
8  
9  
10  
11  
12  
13  
14  
15  
16  
17  
18  
19  
20  
21  
22  
23  
24  
25  
26  
27  
28  
29  
30  
31  
32  
33  
34  
35  
36  
37  
38  
39  
40  
41  
42  
43  
44  
45  
46  
47

For peer review only

**FIGURES**

**Figure 1: Conceptual Framework**

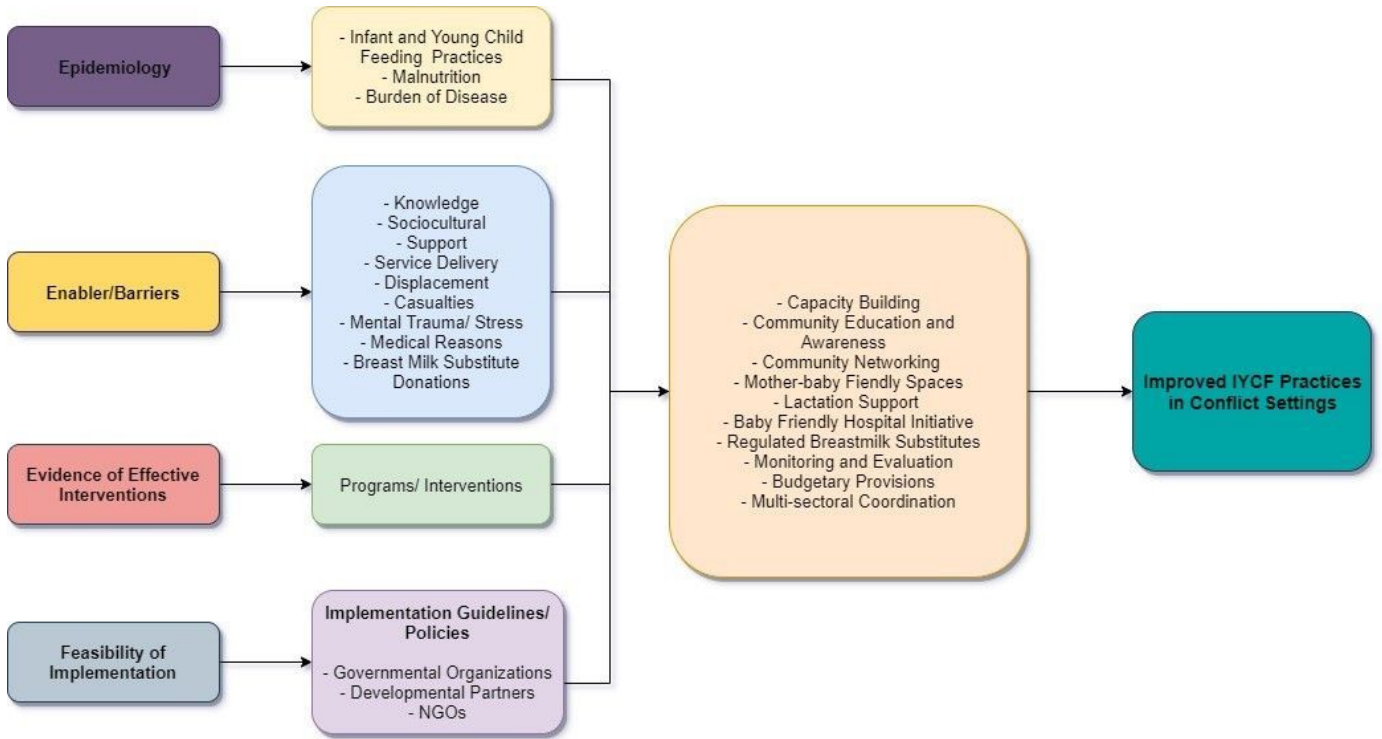

view only

**Figure 2: Search Flow Diagram**

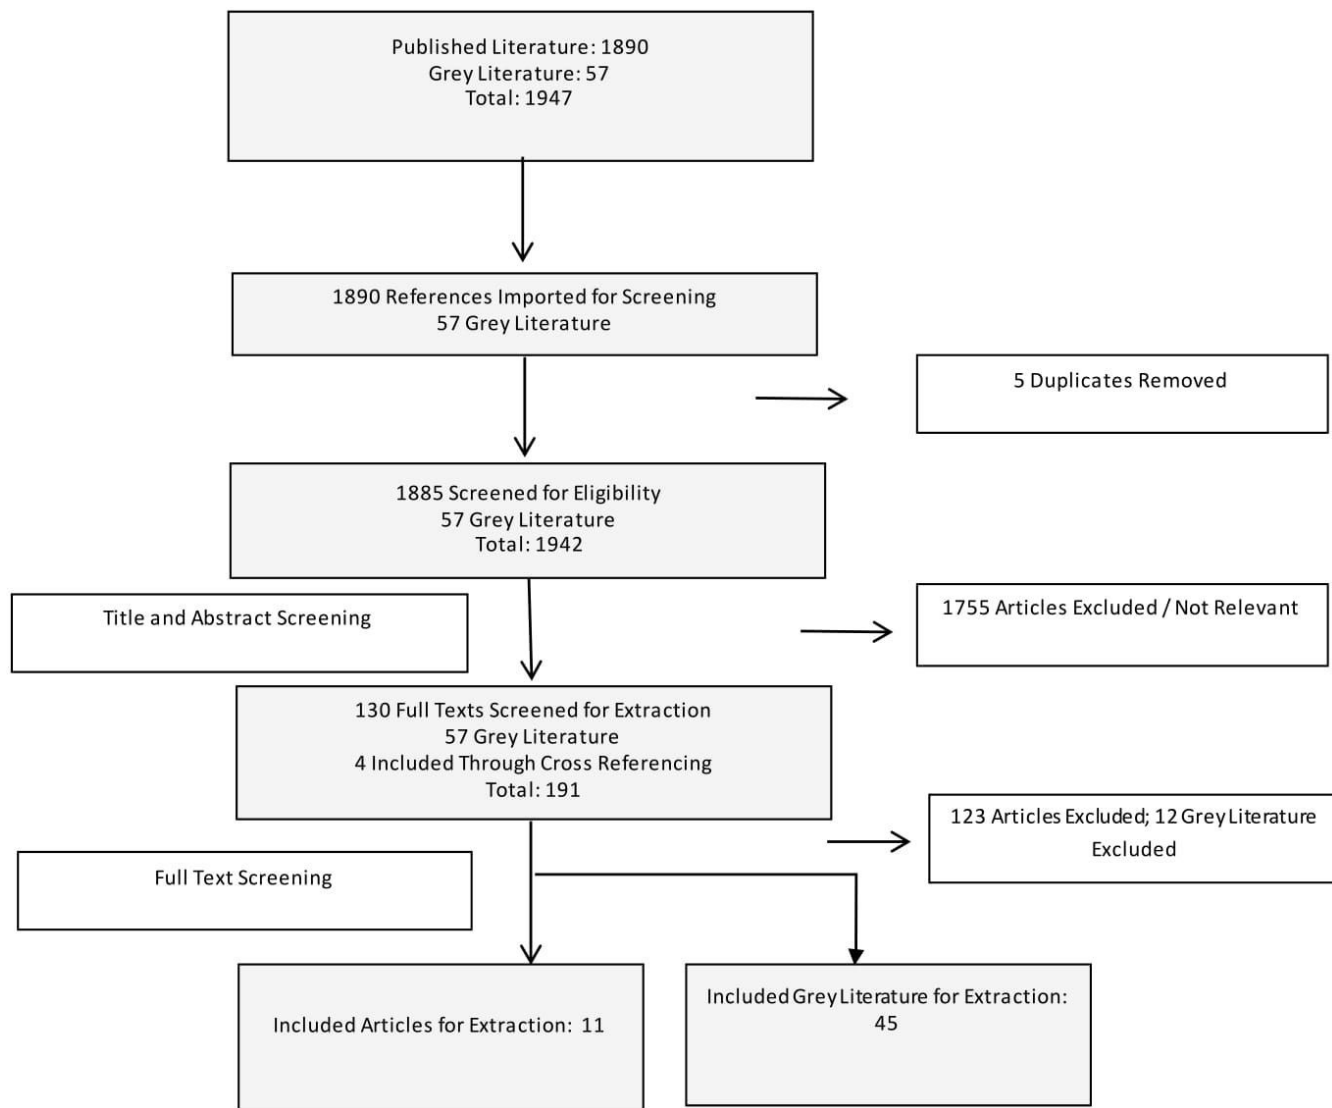

**Figure 3: Barriers to optimal breastfeeding practices**

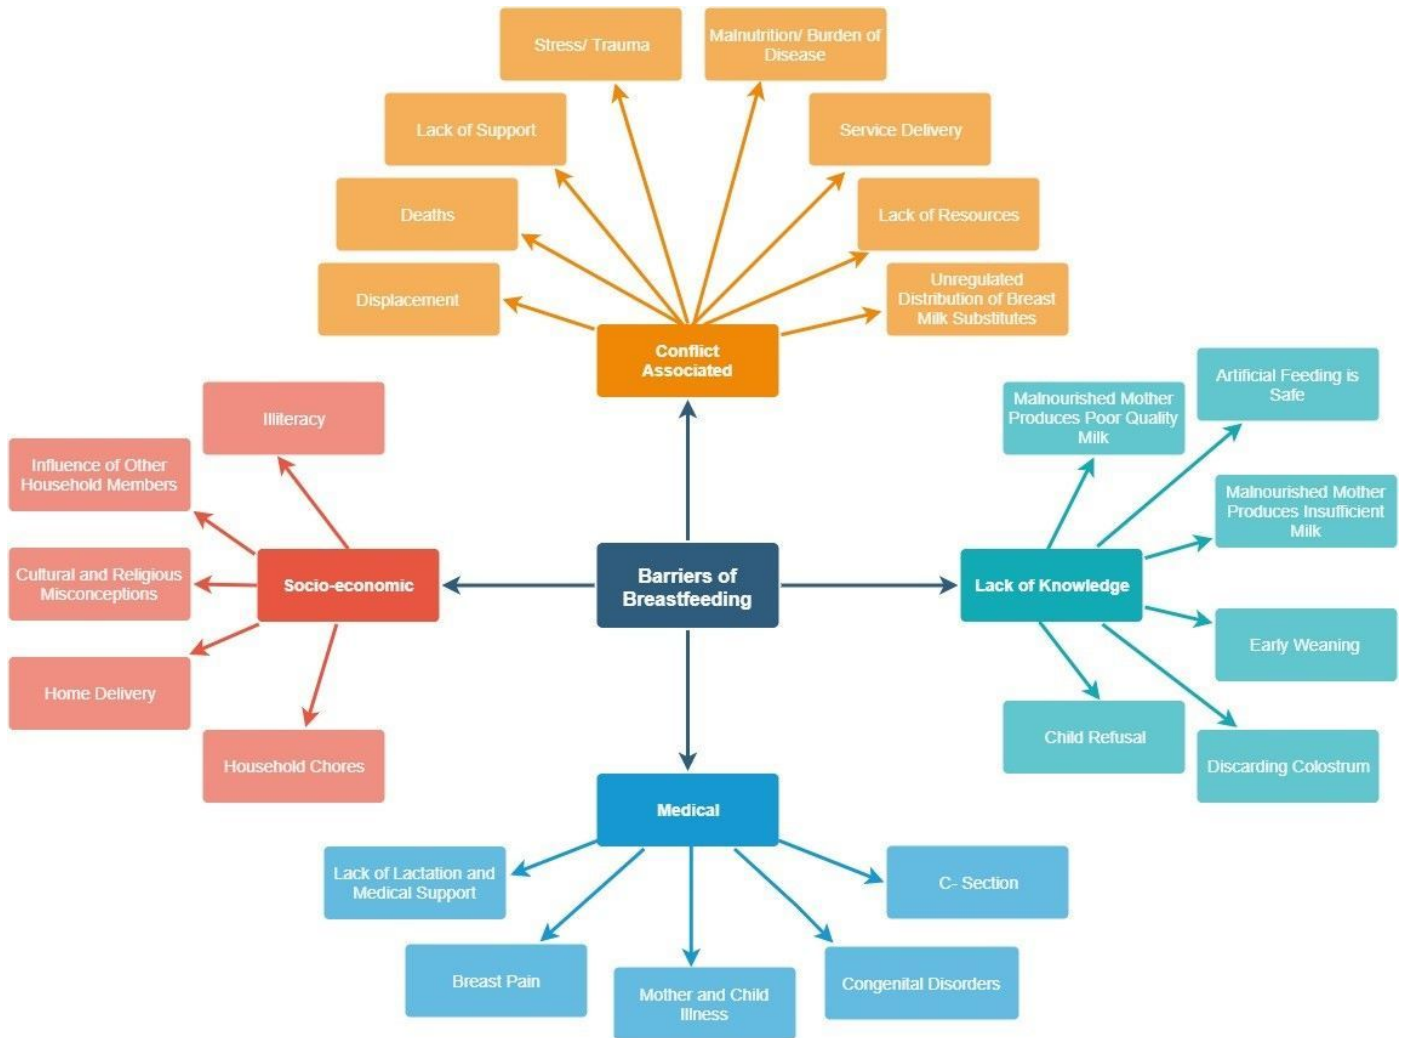

Figure 4: Implementation Guidelines

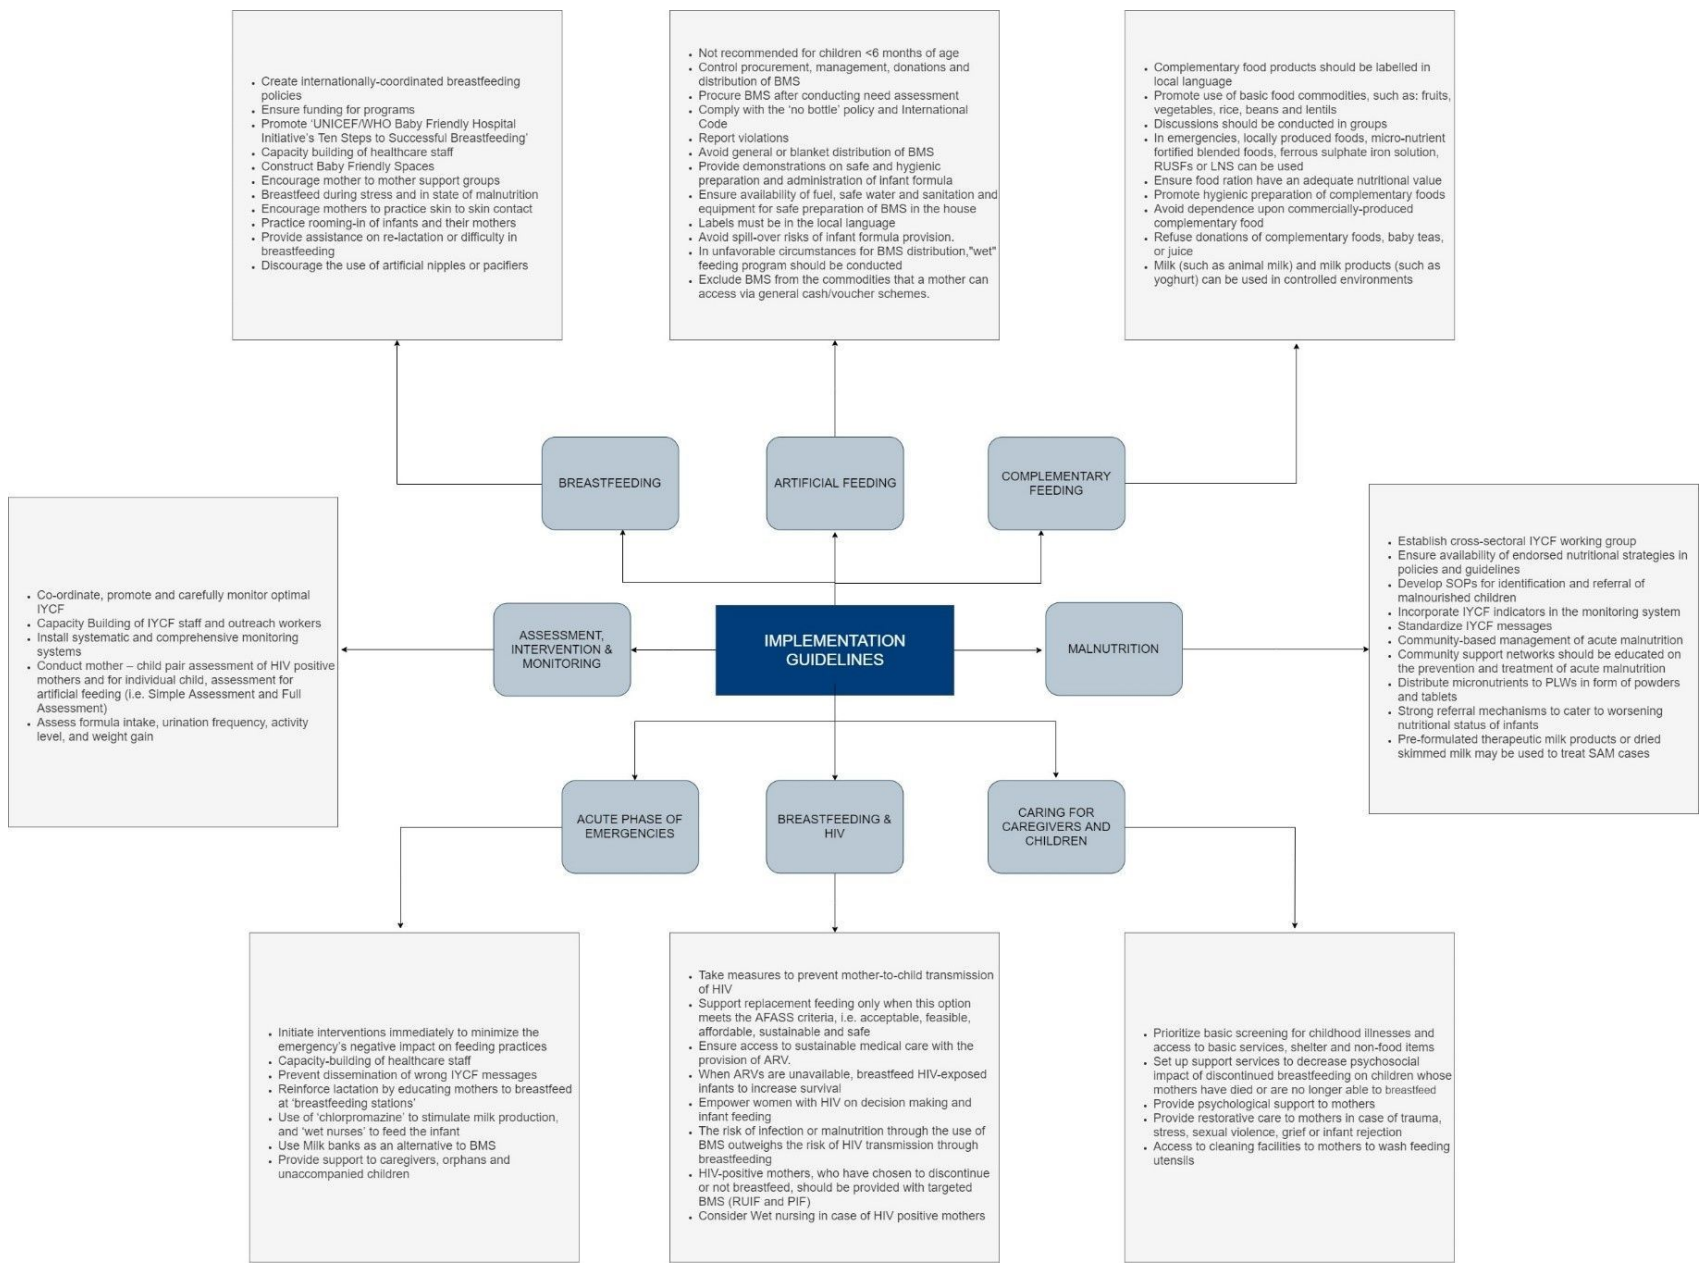

- Create internationally-coordinated breastfeeding policies
- Ensure funding for programs
- Promote 'UNICEF/WHO Baby Friendly Hospital Initiative's Ten Steps to Successful Breastfeeding'
- Capacity building of healthcare staff
- Construct Baby Friendly Spaces
- Encourage mother to mother support groups
- Breastfeed during stress and in state of malnutrition
- Encourage mothers to practice skin to skin contact
- Practice rooming-in of infants and their mothers
- Provide assistance on re-lactation or difficulty in breastfeeding
- Discourage the use of artificial nipples or pacifiers

- Not recommended for children <6 months of age
- Control procurement, management, donations and distribution of BMS
- Procure BMS after conducting need assessment
- Comply with the 'no bottle' policy and International Code
- Report violations
- Avoid general or blanket distribution of BMS
- Provide demonstrations on safe and hygienic preparation and administration of infant formula
- Ensure availability of fuel, safe water and sanitation and equipment for safe preparation of BMS in the house
- Labels must be in the local language
- Avoid spill-over risks of infant formula provision.
- In unfavorable circumstances for BMS distribution, "wet" feeding program should be conducted
- Exclude BMS from the commodities that a mother can access via general cash/voucher schemes.

- Complementary food products should be labelled in local language
- Promote use of basic food commodities, such as: fruits, vegetables, rice, beans and lentils
- Discussions should be conducted in groups
- In emergencies, locally produced foods, micro-nutrient fortified blended foods, ferrous sulphate iron solution, RUSFs or LNS can be used
- Ensure food rations have an adequate nutritional value
- Promote hygienic preparation of complementary foods
- Avoid dependence upon commercially-produced complementary food
- Refuse donations of complementary foods, baby teas, or juice
- Milk (such as animal milk) and milk products (such as yoghurt) can be used in controlled environments

- Co-ordinate, promote and carefully monitor optimal IYCF
- Capacity Building of IYCF staff and outreach workers
- Install systematic and comprehensive monitoring systems
- Conduct mother – child pair assessment of HIV positive mothers and for individual child, assessment for artificial feeding (i.e. Simple Assessment and Full Assessment)
- Assess formula intake, urination frequency, activity level, and weight gain

BREASTFEEDING

ARTIFICIAL FEEDING

COMPLEMENTARY FEEDING

ASSESSMENT, INTERVENTION & MONITORING

IMPLEMENTATION GUIDELINES

MALNUTRITION

ACUTE PHASE OF EMERGENCIES

BREASTFEEDING & HIV

CARING FOR CAREGIVERS AND CHILDREN

- Establish cross-sectoral IYCF working group
- Ensure availability of endorsed nutritional strategies in policies and guidelines
- Develop SOPs for identification and referral of malnourished children
- Incorporate IYCF indicators in the monitoring system
- Standardize IYCF messages
- Community-based management of acute malnutrition
- Community support networks should be educated on the prevention and treatment of acute malnutrition
- Distribute micronutrients to PLWs in form of powders and tablets
- Strong referral mechanisms to cater to worsening nutritional status of infants
- Pre-formulated therapeutic milk products or dried skimmed milk may be used to treat SAM cases

- Initiate interventions immediately to minimize the emergency's negative impact on feeding practices
- Capacity-building of healthcare staff
- Prevent dissemination of wrong IYCF messages
- Reinforce lactation by educating mothers to breastfeed at 'breastfeeding stations'
- Use of 'chlorpromazine' to stimulate milk production, and 'wet nurses' to feed the infant
- Use Milk banks as an alternative to BMS
- Provide support to caregivers, orphans and unaccompanied children

- Take measures to prevent mother-to-child transmission of HIV
- Support replacement feeding only when this option meets the AFASS criteria, i.e. acceptable, feasible, affordable, sustainable and safe
- Ensure access to sustainable medical care with the provision of ARV.
- When ARV's are unavailable, breastfeed HIV-exposed infants to increase survival
- Empower women with HIV on decision making and infant feeding
- The risk of infection or malnutrition through the use of BMS outweighs the risk of HIV transmission through breastfeeding
- HIV-positive mothers, who have chosen to discontinue or not breastfeed, should be provided with targeted BMS (RUIF and PIF)
- Consider Wet nursing in case of HIV positive mothers

- Prioritize basic screening for childhood illnesses and access to basic services, shelter and non-food items
- Set up support services to decrease psychosocial impact of discontinued breastfeeding on children whose mothers have died or are no longer able to breastfeed
- Provide psychological support to mothers
- Provide restorative care to mothers in case of trauma, stress, sexual violence, grief or infant rejection
- Access to cleaning facilities to mothers to wash feeding utensils

1  
2  
3  
4  
5  
6  
7  
8  
9  
10  
11  
12  
13  
14  
15  
16  
17  
18  
19  
20  
21  
22  
23  
24  
25  
26  
27  
28  
29  
30  
31  
32  
33  
34  
35  
36  
37  
38  
39  
40  
41  
42  
43  
44  
45  
46  
47  
48  
49  
50  
51  
52  
53  
54  
55  
56  
57  
58  
59  
60

For peer review only



| Components of breastfeeding                                  | Operational Guidelines                                                                                                                                                                                                                                                                                                                                                                                                                                                                                                                                                                                                                                                                                                                                                                                                                                                                                                                                                                                                                                                                                                                                                                                                                                                                                                                                                                                                                                                                                                                                                                                                                                                                                                                                                                                                                                                                                                                                                                                                                                                                                                                                                                                                                                                                                                                                                                                                                                                                                                                                                                                                                                                                                                                                                                                                                                                                                                                                                                                                                                                                                                                                                                                                                                                                                                                                                                                                                                                                                                                                                                                                                                                                                                                                                                                                                                                                                                                                                                                                                                                                                                                                                                                                                                                                                                                                                                                                                                                                                                                                                                      |
|--------------------------------------------------------------|---------------------------------------------------------------------------------------------------------------------------------------------------------------------------------------------------------------------------------------------------------------------------------------------------------------------------------------------------------------------------------------------------------------------------------------------------------------------------------------------------------------------------------------------------------------------------------------------------------------------------------------------------------------------------------------------------------------------------------------------------------------------------------------------------------------------------------------------------------------------------------------------------------------------------------------------------------------------------------------------------------------------------------------------------------------------------------------------------------------------------------------------------------------------------------------------------------------------------------------------------------------------------------------------------------------------------------------------------------------------------------------------------------------------------------------------------------------------------------------------------------------------------------------------------------------------------------------------------------------------------------------------------------------------------------------------------------------------------------------------------------------------------------------------------------------------------------------------------------------------------------------------------------------------------------------------------------------------------------------------------------------------------------------------------------------------------------------------------------------------------------------------------------------------------------------------------------------------------------------------------------------------------------------------------------------------------------------------------------------------------------------------------------------------------------------------------------------------------------------------------------------------------------------------------------------------------------------------------------------------------------------------------------------------------------------------------------------------------------------------------------------------------------------------------------------------------------------------------------------------------------------------------------------------------------------------------------------------------------------------------------------------------------------------------------------------------------------------------------------------------------------------------------------------------------------------------------------------------------------------------------------------------------------------------------------------------------------------------------------------------------------------------------------------------------------------------------------------------------------------------------------------------------------------------------------------------------------------------------------------------------------------------------------------------------------------------------------------------------------------------------------------------------------------------------------------------------------------------------------------------------------------------------------------------------------------------------------------------------------------------------------------------------------------------------------------------------------------------------------------------------------------------------------------------------------------------------------------------------------------------------------------------------------------------------------------------------------------------------------------------------------------------------------------------------------------------------------------------------------------------------------------------------------------------------------------------------------------|
| <p>I. Protecting, promoting and supporting breastfeeding</p> | <ol style="list-style-type: none"> <li>1. Infants should be exclusively breast fed for the first 6 months of life, followed by appropriate complementary feeding along with continued breastfeeding for two<sup>1-14</sup></li> <li>2. Relief agencies should create internationally-coordinated breastfeeding policies with practical guidelines explicitly stated for field workers and decision<sup>2, 7, 10, 12, 13, 15, 16</sup></li> <li>3. National policies and technical guidelines on IYCF- E should be explicitly stated and communicated to relevant staff in order to increase preparedness if an emergency strikes. This is particularly important for high-risk countries<sup>2, 12, 13, 17, 18</sup></li> <li>4. Funding should be provided for programs to support breastfeeding<sup>2, 13, 19</sup></li> <li>5. It should be ensured that optimal breastfeeding practices and maternal care is promoted according to 'UNICEF/WHO Baby Friendly Hospital Initiative's Ten Steps to Successful Breastfeeding'<sup>2, 10, 20</sup></li> <li>6. Ensure that relief workers, healthcare staff, technical and non-technical personnel are trained in appropriate infant and young child feeding practices using available training material and key information on IYCF integrated into routine assessment<sup>2, 7, 10, 12-16, 20-23</sup></li> <li>7. Appropriate and timely support and trainings for breastfeeding and young child feeding should be integrated at all levels of healthcare<sup>2, 16, 21, 23</sup></li> <li>8. Efforts should be made to raise awareness supporting the superiority of breastfeeding as a life-saving intervention to health personnel, relief staff, NGOs, stakeholders and the general public focusing primarily on pregnant and breastfeeding women<sup>2, 10, 12, 20, 22, 24, 25</sup></li> <li>9. In conflict and refugee settings, traditional birth attendants (TBAs) are more accessible to mothers than nurses and midwives, therefore TBAs should be trained regarding appropriate breastfeeding practices<sup>17, 20, 24</sup></li> <li>10. Pregnant women and breastfeeding mothers should be informed using clear language about maternal health, how to properly breastfeed, advantages and maintenance of breastfeeding, negative effects of bottle-feeding and the difficulty to reverse decision not to breastfeed<sup>2, 6, 7, 10, 14, 17, 20, 22, 24, 25</sup></li> <li>11. Encourage mothers to initiate breastfeeding within the first hour of birth, and to exclusively breastfeed for the first six months of life (do not give them extra water, juices, tea or food) unless medically indicated otherwise. Thereafter, solid foods should be introduced, but breastfeeding should continue for at least a year or two<sup>2, 6, 7, 10, 11, 14, 15, 17, 26</sup></li> <li>12. Educate mothers to not stop breastfeeding in emergency situations and spread awareness that exclusive breastfeeding provides the best nutrition to babies. Moreover, breastmilk contains ingredients that protects babies from infection, so it's particularly useful in emergency situations<sup>2, 6, 10, 13, 15, 17</sup></li> <li>13. Encourage mothers to breastfeed on demand<sup>2, 7, 14, 17</sup></li> <li>14. Practice rooming-in of infants and their mothers (allow mothers and infants to remain together 24 hours a day) to support breastfeeding practice<sup>2, 7</sup></li> <li>15. Colostrum should be given to the baby to improve its physical growth and feeding baby should not be interrupted in between. The baby lets go off the breast when he/she is done<sup>10, 17, 26</sup></li> <li>16. Discourage the use of artificial nipples or pacifiers<sup>2, 7, 10, 24</sup></li> <li>17. Educate mothers on breastfeeding and the procedure to maintain lactation even when the mother-infant pair is temporarily separated<sup>2, 7, 10, 24</sup></li> <li>18. Ensure that mothers are facilitated by the provision of counseling and other forms of assistance for the purpose of re-lactation or difficulty in breastfeeding<sup>2, 6, 7, 10, 11, 14, 21, 23, 26, 27</sup></li> <li>19. Mothers should also be made aware that breast milk supply is not reduced by stress, though the release of milk could be affected<sup>6, 8, 10, 14, 18</sup></li> <li>20. Encourage mothers to practice skin to skin contact as this aids in reducing stress (cortisol) levels and helps the flow of mother's milk. This can be practiced using slings and wraps. Moreover, correct positioning of baby</li> </ol> |

|                                                                                                                                                                                                                                                                                                                                                                                                                               |                                                                                                                                                                                                                                                                                                                                                                                                                                                                                                                                                                                                                                                                                                                                                                                                                                                                                                                                                                                                                                                                                                                                                                                                                                                                                                                                                                                                                                                                                                                                                                                                                                                                                                                                                                                                                                                                                                                                                                                                                                                                                                                                                                                                                                                                                                                                                                                                                                                                                                                                                                                                                                                                                                                                                                                                                                                                                                                                                                                                                                                                                                                                                                                                                                                                                                                                                                                                                                                                                                                                                                                                                                                                                                                                                                                                                                                                                                                                                                                                                                                                                                                                                                                                                                                                                                                                                                                                                                                                                                                                                                                                                       |
|-------------------------------------------------------------------------------------------------------------------------------------------------------------------------------------------------------------------------------------------------------------------------------------------------------------------------------------------------------------------------------------------------------------------------------|-----------------------------------------------------------------------------------------------------------------------------------------------------------------------------------------------------------------------------------------------------------------------------------------------------------------------------------------------------------------------------------------------------------------------------------------------------------------------------------------------------------------------------------------------------------------------------------------------------------------------------------------------------------------------------------------------------------------------------------------------------------------------------------------------------------------------------------------------------------------------------------------------------------------------------------------------------------------------------------------------------------------------------------------------------------------------------------------------------------------------------------------------------------------------------------------------------------------------------------------------------------------------------------------------------------------------------------------------------------------------------------------------------------------------------------------------------------------------------------------------------------------------------------------------------------------------------------------------------------------------------------------------------------------------------------------------------------------------------------------------------------------------------------------------------------------------------------------------------------------------------------------------------------------------------------------------------------------------------------------------------------------------------------------------------------------------------------------------------------------------------------------------------------------------------------------------------------------------------------------------------------------------------------------------------------------------------------------------------------------------------------------------------------------------------------------------------------------------------------------------------------------------------------------------------------------------------------------------------------------------------------------------------------------------------------------------------------------------------------------------------------------------------------------------------------------------------------------------------------------------------------------------------------------------------------------------------------------------------------------------------------------------------------------------------------------------------------------------------------------------------------------------------------------------------------------------------------------------------------------------------------------------------------------------------------------------------------------------------------------------------------------------------------------------------------------------------------------------------------------------------------------------------------------------------------------------------------------------------------------------------------------------------------------------------------------------------------------------------------------------------------------------------------------------------------------------------------------------------------------------------------------------------------------------------------------------------------------------------------------------------------------------------------------------------------------------------------------------------------------------------------------------------------------------------------------------------------------------------------------------------------------------------------------------------------------------------------------------------------------------------------------------------------------------------------------------------------------------------------------------------------------------------------------------------------------------------------------------------------------------|
| <p>1<br/>2<br/>3<br/>4<br/>5<br/>6<br/>7<br/>8<br/>9<br/>10<br/>11<br/>12<br/>13<br/>14<br/>15<br/>16<br/>17<br/>18<br/>19<br/>20<br/>21<br/>22<br/>23<br/>24<br/>25<br/>26<br/>27<br/>28<br/>29<br/>30<br/>31<br/>32<br/>33<br/>34<br/>35<br/>36<br/>37<br/>38<br/>39<br/>40<br/>41<br/>42<br/>43<br/>44<br/>45<br/>46<br/>47<br/>48<br/>49<br/>50<br/>51<br/>52<br/>53<br/>54<br/>55<br/>56<br/>57<br/>58<br/>59<br/>60</p> | <p>during breastfeeding is important as effective suckling also triggers breast milk production<sup>6, 10, 11, 14, 15, 17, 24, 26</sup></p> <ol style="list-style-type: none"> <li>21. Malnourished mothers can produce enough milk to breastfeed, however, she should be treated for malnourishment<sup>6, 10, 14, 15, 17, 26</sup></li> <li>22. Relief workers should provide nutritional support by giving a general ration to pregnant and lactating women. If full general ration is not possible, then food and micronutrient supplements should be sufficiently provided. This is because an optimally fed mother will be able to optimally feed her infant. Give adequate food to the malnourished mother to prevent depletion of her own nutrients and closely monitor the weight and urine production of the infant<sup>6, 10, 11, 15, 17, 18, 21, 23, 24, 26</sup></li> <li>23. In emergency settings, extra breastfeeding support should be provided by encouraging Baby Friendly Spaces, which provide a platform to support mothers/caregivers and promote appropriate infant and young children feeding practices, privacy and safety<sup>2, 11, 12, 15, 18, 21-24, 26</sup></li> <li>24. For refugees and displaced populations, establish rest areas for pregnant women/caregivers/mothers and children in transit. These should be secluded, private and culturally appropriate areas that assist women and children to relax and nurse<sup>2, 6, 11, 15, 18, 21, 23, 24</sup></li> <li>25. Establish a program to encourage mother to mother/ women to women support<sup>2, 6, 7, 20, 21, 23, 24</sup></li> <li>26. Establish registration of newborn infants, i.e. within two weeks of delivery, to ensure timely additional rations and breastfeeding support for lactating and breastfeeding mothers. Nutrition workers should help mothers to establish exclusive breastfeeding<sup>2, 6, 12, 16, 18, 23, 24</sup></li> <li>27. Vulnerable groups, especially newly arriving mothers and infants with severe feeding problems should be identified and referred for immediate assistance<sup>2, 6, 12, 15, 16, 18, 21, 23</sup></li> <li>28. Create referral and follow-up systems for mothers/caregivers and their infants<sup>2, 3, 6, 7</sup></li> <li>29. Avoid giving estrogen containing contraceptive pills to mothers because they decrease breastmilk production<sup>24</sup></li> <li>30. Encourage mothers to build their confidence which leads to production of oxytocin to improve blood flow<sup>26</sup></li> <li>31. Continue to breastfeed sick children or when they are less hungry. In case they are not hungry then put them to breast more repeatedly to ensure that they take enough breastmilk<sup>6, 10, 11, 14, 17, 26</sup></li> <li>32. When natural breastfeeding is not possible, available alternatives should be evaluated before an appropriate choice is made. This may include evaluating between: wet-nursing, the use of milk bank, home-modified milk and the use of locally purchased commercial infant formula or generic unbranded infant formula<sup>10, 12, 15, 23, 24, 28</sup></li> <li>33. Access to infant formula should be based on the guidelines set by the WHO International Code of Marketing of Breast Milk Substitutes, 1981<sup>10, 25</sup></li> <li>34. Support should be provided for artificial feeding and this should be distinct from the support being provided for breastfeeding<sup>1, 2, 4, 6, 10, 12, 19, 23</sup></li> <li>35. Lactating women can take most medicines (including antibiotics) and can be immunized as well, as recommended for adults and adolescents to protect against infectious diseases (measles, mumps, rubella, tetanus, diphtheria, pertussis, influenza, Streptococcus pneumoniae, Neisseria meningitidis, hepatitis A, hepatitis B, varicella, and inactivated polio)<sup>15</sup></li> <li>36. In case of radiation exposure       <ol style="list-style-type: none"> <li>a. Women who were exposed to radiation should be advised to temporarily stop breastfeeding unless there is no other source of feeding available for the infant. These mothers should pump and discard their milk until the infant can resume breastfeeding</li> <li>b. In case of interruption of breastfeeding, preferred source of infant feed is human milk that was pumped and stored prior to the radiation exposure or ready-to-feed infant formula. Mothers should use powdered or concentrated formula only if they are sure that water used to reconstitute is free from radiation</li> </ol> </li> </ol> |
|-------------------------------------------------------------------------------------------------------------------------------------------------------------------------------------------------------------------------------------------------------------------------------------------------------------------------------------------------------------------------------------------------------------------------------|-----------------------------------------------------------------------------------------------------------------------------------------------------------------------------------------------------------------------------------------------------------------------------------------------------------------------------------------------------------------------------------------------------------------------------------------------------------------------------------------------------------------------------------------------------------------------------------------------------------------------------------------------------------------------------------------------------------------------------------------------------------------------------------------------------------------------------------------------------------------------------------------------------------------------------------------------------------------------------------------------------------------------------------------------------------------------------------------------------------------------------------------------------------------------------------------------------------------------------------------------------------------------------------------------------------------------------------------------------------------------------------------------------------------------------------------------------------------------------------------------------------------------------------------------------------------------------------------------------------------------------------------------------------------------------------------------------------------------------------------------------------------------------------------------------------------------------------------------------------------------------------------------------------------------------------------------------------------------------------------------------------------------------------------------------------------------------------------------------------------------------------------------------------------------------------------------------------------------------------------------------------------------------------------------------------------------------------------------------------------------------------------------------------------------------------------------------------------------------------------------------------------------------------------------------------------------------------------------------------------------------------------------------------------------------------------------------------------------------------------------------------------------------------------------------------------------------------------------------------------------------------------------------------------------------------------------------------------------------------------------------------------------------------------------------------------------------------------------------------------------------------------------------------------------------------------------------------------------------------------------------------------------------------------------------------------------------------------------------------------------------------------------------------------------------------------------------------------------------------------------------------------------------------------------------------------------------------------------------------------------------------------------------------------------------------------------------------------------------------------------------------------------------------------------------------------------------------------------------------------------------------------------------------------------------------------------------------------------------------------------------------------------------------------------------------------------------------------------------------------------------------------------------------------------------------------------------------------------------------------------------------------------------------------------------------------------------------------------------------------------------------------------------------------------------------------------------------------------------------------------------------------------------------------------------------------------------------------------------------------------|

|                                                                                                   |                                                                                                                                                                                                                                                                                                                                                                                                                                                                                                                                                                                                                                                                                                                                                                                                                                                                                                                                                                                                                                                                                                                                                                                                                                                                                                                                                                                                                                                                                                                                                                                                                                                                                                                                                                                                                                                                                                                                                                                                                                                                                                                                                                                                                                                                                                                                                                                                                                                                                                                                                                                                                                                                                                                                                                                                                                                                                                                                                                                                                                                                                                                                                                                                                                                                                                                                                                                                                                                                                                                                                                                                                                                                                                                                                                                                                                                                                                                                                                                                                                                                                                                                                                                                                                                                                                                                                           |
|---------------------------------------------------------------------------------------------------|-----------------------------------------------------------------------------------------------------------------------------------------------------------------------------------------------------------------------------------------------------------------------------------------------------------------------------------------------------------------------------------------------------------------------------------------------------------------------------------------------------------------------------------------------------------------------------------------------------------------------------------------------------------------------------------------------------------------------------------------------------------------------------------------------------------------------------------------------------------------------------------------------------------------------------------------------------------------------------------------------------------------------------------------------------------------------------------------------------------------------------------------------------------------------------------------------------------------------------------------------------------------------------------------------------------------------------------------------------------------------------------------------------------------------------------------------------------------------------------------------------------------------------------------------------------------------------------------------------------------------------------------------------------------------------------------------------------------------------------------------------------------------------------------------------------------------------------------------------------------------------------------------------------------------------------------------------------------------------------------------------------------------------------------------------------------------------------------------------------------------------------------------------------------------------------------------------------------------------------------------------------------------------------------------------------------------------------------------------------------------------------------------------------------------------------------------------------------------------------------------------------------------------------------------------------------------------------------------------------------------------------------------------------------------------------------------------------------------------------------------------------------------------------------------------------------------------------------------------------------------------------------------------------------------------------------------------------------------------------------------------------------------------------------------------------------------------------------------------------------------------------------------------------------------------------------------------------------------------------------------------------------------------------------------------------------------------------------------------------------------------------------------------------------------------------------------------------------------------------------------------------------------------------------------------------------------------------------------------------------------------------------------------------------------------------------------------------------------------------------------------------------------------------------------------------------------------------------------------------------------------------------------------------------------------------------------------------------------------------------------------------------------------------------------------------------------------------------------------------------------------------------------------------------------------------------------------------------------------------------------------------------------------------------------------------------------------------------------------------|
|                                                                                                   | <p>c. Mothers can resume breastfeeding when advised by local health officials or when they have been evacuated from the radiation affected area</p> <p>d. Mothers do not need to stop breastfeeding if both mother and infant have been given appropriate doses of potassium iodide at the right time, according to the advice of local health officials<sup>15</sup></p>                                                                                                                                                                                                                                                                                                                                                                                                                                                                                                                                                                                                                                                                                                                                                                                                                                                                                                                                                                                                                                                                                                                                                                                                                                                                                                                                                                                                                                                                                                                                                                                                                                                                                                                                                                                                                                                                                                                                                                                                                                                                                                                                                                                                                                                                                                                                                                                                                                                                                                                                                                                                                                                                                                                                                                                                                                                                                                                                                                                                                                                                                                                                                                                                                                                                                                                                                                                                                                                                                                                                                                                                                                                                                                                                                                                                                                                                                                                                                                                 |
| <p><b>II. Protecting non-breastfed infants and minimizing the risks of artificial feeding</b></p> | <ol style="list-style-type: none"> <li>1. Breast milk substitute (BMS) is not recommended for children &lt;6 months of age<sup>3, 4, 6, 7, 9, 10, 19, 21, 25, 28</sup></li> <li>2. Procurement, management and distribution of breastmilk substitutes, bottles and teats, and commercial complementary foods should be controlled during emergencies and should comply with the 'no bottle' policy and International Code and WHA guidelines and violations should be reported<sup>1-3, 10, 13, 16, 19, 21-23</sup></li> <li>3. Procure BMS after conducting need assessment of artificial feeding at population level assessment. It may also include nutrition survey, household and community survey. This is recommended to be done in close collaboration with government bodies and by developing Program Cooperation Agreements (PCAs) with local bodies for task implementation<sup>28</sup></li> <li>4. On distribution of BMS, it should be ensured that workforce involved should have enough capacity for assessment, counselling, supply chain management and in providing support to families on WASH and IYCF practices<sup>28</sup></li> <li>5. Donations of free or subsidized breast-milk substitutes, bottles and teats and commercial baby foods at emergency sites should be refused and advocated against as this could put infants lives at risk and undermine breastfeeding practices<sup>2-4, 6, 8, 11-13, 16, 21-23, 28</sup></li> <li>6. The distribution, use and quantity of breast milk substitutes should be controlled by collecting unsolicited donations from all ports of entry and the recipient agencies, and should be stored and managed centrally by a single designated agency<sup>1, 2, 4, 6, 10, 12, 13, 16, 19, 21, 23, 28</sup></li> <li>7. BMS should only be distributed to the infants who really need it and have no viable breastmilk options, based on established criteria (where distribution can be targeted, the supply chain is secure, and the conditions for safe preparation and use can be met). This should be determined by a qualified health or nutrition worker trained in breastfeeding and infant feeding issues<sup>1-4, 6, 7, 9-12, 14-16, 19, 21-23, 27</sup></li> <li>8. Breast-milk substitutes, milk products, bottles and teats should never be part of a general or blanket distribution and their use should be avoided, especially in case of emergency situations or in situations where hygienic conditions can't be ensured and their use should be discouraged. Bottles should be exchanged for cups instead as it's easier to keep them clean<sup>1-4, 6, 7, 10-12, 16, 18, 19, 21, 23, 24, 26-28</sup></li> <li>9. Promotion of breast-milk substitutes at the point of distribution should be strictly discouraged. There should be no advertisement or display of products or items with milk company logos and BMS supplies should not be used as a sales inducement and there should be no provision of single tins/samples of BMS or gifts to mothers. Moreover, no incentives should be offered by manufacturers to health workers to promote BMS products<sup>5, 9, 10, 21-23, 25, 28</sup></li> <li>10. In case of crisis, WHO developmental partners and/or the designated nutrition co-ordinating agency should train as well as support training of staff and mothers on the proper and safe use of infant formula<sup>2, 4, 10, 12, 16, 23</sup></li> <li>11. When the use of infant formula is indicated, before its distribution, mothers and caregivers responsible for feeding should be educated on the specific care needed by a non-breast fed infant, and given practical training and one-on-one demonstrations by a skilled health worker on safe and hygienic preparation and administration of infant formula<sup>1, 2, 4, 6, 7, 10, 12, 19, 21, 23</sup></li> <li>12. There should be regular follow-up visits, to caregivers of targeted infants receiving BMS comprising of regular infant health and growth monitoring and distribution of BMS should be frequent and regular (at least bimonthly), with minimum delays<sup>1, 3, 7, 10, 12, 19, 21</sup></li> <li>13. It should also be ensured that there is availability of fuel, safe water and sanitation and equipment for safe preparation of BMS in the house, prior to</li> </ol> |

|  |                                                                                                                                                                                                                                                                                                                                                                                                                                                                                                                                                                                                                                                                                                                                                                                                                                                                                                                                                                                                                                                                                                                                                                                                                                                                                                                                                                                                                                                                                                                                                                                                                                                                                                                                                                                                                                                                                                                                                                                                                                                                                                                                                                                                                                                                                                                                                                                                                                                                                                                                                                                                                                                                                                                                                                                                                                                                                                                                                                                                                                                                                                                                                                                                                                                                                                                                                                                                                                                                                                                                                                                                                                                                                                                                                                                                                                                                                                                                                                                                                                                                                                                                                                                                                                                                                                                                                                                                                                                                                                                                                                                                                                                                                                                       |
|--|-----------------------------------------------------------------------------------------------------------------------------------------------------------------------------------------------------------------------------------------------------------------------------------------------------------------------------------------------------------------------------------------------------------------------------------------------------------------------------------------------------------------------------------------------------------------------------------------------------------------------------------------------------------------------------------------------------------------------------------------------------------------------------------------------------------------------------------------------------------------------------------------------------------------------------------------------------------------------------------------------------------------------------------------------------------------------------------------------------------------------------------------------------------------------------------------------------------------------------------------------------------------------------------------------------------------------------------------------------------------------------------------------------------------------------------------------------------------------------------------------------------------------------------------------------------------------------------------------------------------------------------------------------------------------------------------------------------------------------------------------------------------------------------------------------------------------------------------------------------------------------------------------------------------------------------------------------------------------------------------------------------------------------------------------------------------------------------------------------------------------------------------------------------------------------------------------------------------------------------------------------------------------------------------------------------------------------------------------------------------------------------------------------------------------------------------------------------------------------------------------------------------------------------------------------------------------------------------------------------------------------------------------------------------------------------------------------------------------------------------------------------------------------------------------------------------------------------------------------------------------------------------------------------------------------------------------------------------------------------------------------------------------------------------------------------------------------------------------------------------------------------------------------------------------------------------------------------------------------------------------------------------------------------------------------------------------------------------------------------------------------------------------------------------------------------------------------------------------------------------------------------------------------------------------------------------------------------------------------------------------------------------------------------------------------------------------------------------------------------------------------------------------------------------------------------------------------------------------------------------------------------------------------------------------------------------------------------------------------------------------------------------------------------------------------------------------------------------------------------------------------------------------------------------------------------------------------------------------------------------------------------------------------------------------------------------------------------------------------------------------------------------------------------------------------------------------------------------------------------------------------------------------------------------------------------------------------------------------------------------------------------------------------------------------------------------------------------------------|
|  | <p>distribution of BMS and implementing a household based program<sup>2-4, 6, 7, 9-11, 14, 15, 21, 23, 25, 26, 28</sup></p> <p>14. For infants determined to be in need of infant formula, the adequate and continued provision of infant formula must continue for as long as they require it, even if it needs to be purchased. IYCF-E programs that include an infant formula provision component should plan to provide it for at least 6 months, or if there is no availability of adequate complementary food, then 12 months<sup>3, 4, 6, 7, 9-12, 14, 19, 22</sup></p> <p>15. Non-breastfed infants over 6 months of age, provided with 6 months of BMS, may require 2-4 weeks of buffer supply to offer transition to non BMS feeding<sup>3, 10</sup></p> <p>16. An improvement should be brought about in health services to manage the adverse effects of artificial feeding, especially the increase in incidence of severe diarrhea and respiratory infections in infants<sup>2, 10</sup></p> <p>17. Generic, unbranded formula is recommended for infants who require infant formula, followed by locally purchased and relabeled infant formula (to be in compliance with The International Code). Home modified milk should only be used temporarily as the last resort for infants less than 6 months old. The type of infant formula should have a shelf life of at least 6 months and be appropriate for the infant, including their age<sup>4, 6, 7, 9, 10, 15, 19, 21, 23</sup></p> <p>18. Labels must adhere to the specific labelling requirements of The International Code and should be in the language of the local population. The BMS packaging should have clear instructions, with pictures, on how to use it, along with clearly specifying the superiority of breast milk<sup>4, 6, 7, 9, 19, 21, 25, 28</sup></p> <p>19. The labels should include a sign of "Important Notice" stating importance of breastfeeding and a statement stating, "The product should be used only on the advice of a health worker as to the need for its use and the proper method of use." They instructions should also state about its safe preparation and health hazard on inappropriate use, and a warning against the health hazards on inappropriate preparation of infant formula<sup>28</sup></p> <p>20. Supply department should assure that BMS manufactured should follow Codex Alimentarius standards. UNICEF has not included BMS in its supply catalogue as a non-standard product<sup>28</sup></p> <p>21. For infants under 6 months of age, the only suitable BMS is infant formula. However, infants over the age of 6 months do not need infant formula but can use other sources of milk (pasteurized full-cream animal milk (cow, goat, sheep), Ultra High Temperature (UHT) milk, fermented milk or yogurt) as these are easier to find and are less dangerous than powdered milk. Condensed milk should not be used for infant feeding<sup>4, 6, 10</sup></p> <p>22. Liquid milk, if being used, should be consumed within a few hours of opening. Baby juices and teas should be avoided as they are low in nutrition and high in sugar. For infants over 6 months of age, infant formula can be mixed into the child's food instead of giving it to drink<sup>6</sup></p> <p>23. Milk products should only be received and distributed in a dry form and even dried milk products should be distributed only when pre-mixed with a milled staple food and should not be distributed as a single commodity. However, dried skim milk is not an appropriate BMS for infant, and even for older children it must be fortified with vitamin A and not given on its own<sup>4, 7, 9, 19, 23</sup></p> <p>24. It should be ensured that there are no spill-over risks of infant formula provision. Measures should be taken to reduce spill-over by ensuring that feeding BMS to a minority of children doesn't undermine breastfeeding practices of the majority. Advertising of infant formula should be stopped, and the provision of infant formula should be discrete, monetary support should be provided to breastfeeding mothers, and a separate space dedicated for breastfeeding support and counseling<sup>1, 2, 4, 6, 10, 12, 19, 23</sup></p> <p>25. When circumstances are not favorable for BMS distribution (safe preparation and use of infant formula can't be ensured), an on-site supplementary "wet" feeding program should be conducted in closed spaces under supervision<sup>4, 7, 21, 23</sup></p> <p>26. Infant formula should not be excluded from the commodities that a mother can access via general cash/voucher schemes. However, it should be</p> |
|--|-----------------------------------------------------------------------------------------------------------------------------------------------------------------------------------------------------------------------------------------------------------------------------------------------------------------------------------------------------------------------------------------------------------------------------------------------------------------------------------------------------------------------------------------------------------------------------------------------------------------------------------------------------------------------------------------------------------------------------------------------------------------------------------------------------------------------------------------------------------------------------------------------------------------------------------------------------------------------------------------------------------------------------------------------------------------------------------------------------------------------------------------------------------------------------------------------------------------------------------------------------------------------------------------------------------------------------------------------------------------------------------------------------------------------------------------------------------------------------------------------------------------------------------------------------------------------------------------------------------------------------------------------------------------------------------------------------------------------------------------------------------------------------------------------------------------------------------------------------------------------------------------------------------------------------------------------------------------------------------------------------------------------------------------------------------------------------------------------------------------------------------------------------------------------------------------------------------------------------------------------------------------------------------------------------------------------------------------------------------------------------------------------------------------------------------------------------------------------------------------------------------------------------------------------------------------------------------------------------------------------------------------------------------------------------------------------------------------------------------------------------------------------------------------------------------------------------------------------------------------------------------------------------------------------------------------------------------------------------------------------------------------------------------------------------------------------------------------------------------------------------------------------------------------------------------------------------------------------------------------------------------------------------------------------------------------------------------------------------------------------------------------------------------------------------------------------------------------------------------------------------------------------------------------------------------------------------------------------------------------------------------------------------------------------------------------------------------------------------------------------------------------------------------------------------------------------------------------------------------------------------------------------------------------------------------------------------------------------------------------------------------------------------------------------------------------------------------------------------------------------------------------------------------------------------------------------------------------------------------------------------------------------------------------------------------------------------------------------------------------------------------------------------------------------------------------------------------------------------------------------------------------------------------------------------------------------------------------------------------------------------------------------------------------------------------------------------------------------|

|                                                                                                            |                                                                                                                                                                                                                                                                                                                                                                                                                                                                                                                                                                                                                                                                                                                                                                                                                                                                                                                                                                                                                                                                                                                                                                                                                                                                                                                                                                                                                                                                                                                                                                                                                                                                                                                                                                                                                                                                                                                                                                                                                                                                                                                                                                                                                                                                                                                                                                                                                                                                                                                                                                                                                                                                                                                                                                                                                                                                                                                                                                                                                                                                                                                                                                                                                                                                                                                                                                                                                                                                                                                                                                                                                                                                                                                    |
|------------------------------------------------------------------------------------------------------------|--------------------------------------------------------------------------------------------------------------------------------------------------------------------------------------------------------------------------------------------------------------------------------------------------------------------------------------------------------------------------------------------------------------------------------------------------------------------------------------------------------------------------------------------------------------------------------------------------------------------------------------------------------------------------------------------------------------------------------------------------------------------------------------------------------------------------------------------------------------------------------------------------------------------------------------------------------------------------------------------------------------------------------------------------------------------------------------------------------------------------------------------------------------------------------------------------------------------------------------------------------------------------------------------------------------------------------------------------------------------------------------------------------------------------------------------------------------------------------------------------------------------------------------------------------------------------------------------------------------------------------------------------------------------------------------------------------------------------------------------------------------------------------------------------------------------------------------------------------------------------------------------------------------------------------------------------------------------------------------------------------------------------------------------------------------------------------------------------------------------------------------------------------------------------------------------------------------------------------------------------------------------------------------------------------------------------------------------------------------------------------------------------------------------------------------------------------------------------------------------------------------------------------------------------------------------------------------------------------------------------------------------------------------------------------------------------------------------------------------------------------------------------------------------------------------------------------------------------------------------------------------------------------------------------------------------------------------------------------------------------------------------------------------------------------------------------------------------------------------------------------------------------------------------------------------------------------------------------------------------------------------------------------------------------------------------------------------------------------------------------------------------------------------------------------------------------------------------------------------------------------------------------------------------------------------------------------------------------------------------------------------------------------------------------------------------------------------------|
|                                                                                                            | <p>accompanied by interventions such as providing essential information on breastfeeding and on how to reduce the risks of formula feeding<sup>6</sup></p> <p>27. Breast milk donations should be authorized and be regulated by the Ministry of Health. Until the arrival of the beneficiary, cold chain should be maintained for donated frozen breast milk<sup>2, 26, 28</sup></p> <p>28. The psychosocial impact of discontinued breastfeeding on children whose mothers have died or are no longer able to breastfeed should also be considered and support services should be set up to address this<sup>12, 16</sup></p> <p>29. One guideline mentioned that it should be known and taken care of that transitioning out from an emergency IYCF-E program with an infant formula provision component requires a solid, long-term exit strategy with ties to both facility and community-based structures<sup>12</sup></p>                                                                                                                                                                                                                                                                                                                                                                                                                                                                                                                                                                                                                                                                                                                                                                                                                                                                                                                                                                                                                                                                                                                                                                                                                                                                                                                                                                                                                                                                                                                                                                                                                                                                                                                                                                                                                                                                                                                                                                                                                                                                                                                                                                                                                                                                                                                                                                                                                                                                                                                                                                                                                                                                                                                                                                                   |
| <p><b>III. Protecting, promoting and supporting appropriate, safe and timely complementary feeding</b></p> | <ol style="list-style-type: none"> <li>1. To promote growth and development of infants, encourage appropriate, timely and safe complementary feeding for infants (aged &gt; 6 months) and young children (aged between 12 to &lt; 24 months), along with continued breastfeeding<sup>1-7, 9, 11, 12, 14, 18, 23</sup></li> <li>2. Children over the age of 6 months of age should be given complementary foods (solid, semi-solid and soft foods) that are easy to eat and digest and nutritionally complement breast milk<sup>1, 2, 6, 18</sup></li> <li>3. Conduct discussion in groups on complementary feeding and weaning<sup>26</sup></li> <li>4. Promote the growth of locally produced food and encourage mothers/caregivers to use these locally-produced, inexpensive foods for complementary feeding. These include basic food commodities, such as: fruits, vegetables, rice, beans and lentils<sup>9, 12, 18, 23</sup></li> <li>5. Increase frequency and variety of complementary food with the growing age of child to meet his/her nutritional needs<sup>26</sup></li> <li>6. In emergencies, locally produced foods, micro-nutrient fortified blended foods, ferrous sulphate iron solution (iron drops), Ready-to-Use Supplementary Foods (RUSFs) or Lipid based Nutrient Supplements (LNS) can be used for complementary feeding depending on the nutritional situation<sup>12, 18, 23, 28</sup></li> <li>7. Special attention must be given to ensure that the food ration distributed for old infants and young children have an adequate nutritional value (food should be fortified with vitamins and minerals<sup>4, 6, 16, 20, 23</sup></li> <li>8. Establish services to extend nutritional support to vulnerable groups, such as: orphans and unaccompanied infants and young children<sup>2, 6, 12, 15, 16, 21, 23</sup></li> <li>9. Promote hygienic preparation of complementary foods by providing mothers/caregivers necessary information and support<sup>6, 23</sup></li> <li>10. In emergencies, special consideration should be made to mitigate the obstacles faced by mothers/caregivers in the preparation (cook, mash, etc.) of age-appropriate complementary foods. Measures needed to counter these obstacles should be incorporated in the program design<sup>6, 12, 18</sup></li> <li>11. IYCF-E programs relating to complementary feeding should include:       <ol style="list-style-type: none"> <li>a. Group sensitization and education</li> <li>b. Develop local food recipes focusing on nutritional value, affordability and food dietary diversity</li> <li>c. Provide cooking demonstrations, and</li> <li>d. Support mothers/caregivers to prepare complementary foods via initiatives such as fresh food vouchers<sup>12</sup></li> </ol> </li> <li>12. Dependence upon commercially-produced complementary foods should be avoided<sup>9, 23</sup></li> <li>13. Mothers should be assured that in the absence of safe complementary foods, breastmilk is a significant source of nutrition for infants the first year of life and beyond<sup>15</sup></li> <li>14. Donations of complementary foods, baby teas, or juices should be refused. If there are donated supplies, they should be directed to the designated coordinating agency on nutrition/health to be managed appropriately<sup>6</sup></li> <li>15. Promotion of a varied diet, dairy products in particular, to ensure that energy, protein, mineral and vitamin requirements are met. Moreover, when preparing food for infants such as porridges, mashed potatoes, etc., milk and infant formula can be added to it to increase the nutrient content<sup>4, 6, 20, 26</sup></li> </ol> |



|                                          |                                                                                                                                                                                                                                                                                                                                                                                                                                                                                                                                                                                                                                                                                                                                                                                                                                                                                                                                                                                                                                                                                                                                                                                                                                                                                                                                                                                                                                                                                                                                                                                                                                                                                                                                                                                                                                                                                                                                                                                                                                         |
|------------------------------------------|-----------------------------------------------------------------------------------------------------------------------------------------------------------------------------------------------------------------------------------------------------------------------------------------------------------------------------------------------------------------------------------------------------------------------------------------------------------------------------------------------------------------------------------------------------------------------------------------------------------------------------------------------------------------------------------------------------------------------------------------------------------------------------------------------------------------------------------------------------------------------------------------------------------------------------------------------------------------------------------------------------------------------------------------------------------------------------------------------------------------------------------------------------------------------------------------------------------------------------------------------------------------------------------------------------------------------------------------------------------------------------------------------------------------------------------------------------------------------------------------------------------------------------------------------------------------------------------------------------------------------------------------------------------------------------------------------------------------------------------------------------------------------------------------------------------------------------------------------------------------------------------------------------------------------------------------------------------------------------------------------------------------------------------------|
|                                          | <p>16. Pastoral communities mainly use milk and milk products, which contains a significant amount of nutrition for children over six months. As a part of complementary feeding, milk (such as animal milk) and milk products (such as yoghurt) can be provided to infants over 6 months of age. In such cases, distribution of milk products can only be conducted in controlled environments under strict supervision, such as on-the-spot feeding<sup>3</sup></p> <p>17. Good nutrient sources for infants are animal source foods, such as yogurt and cheese whereas products containing only fruits/vegetables are less energy and nutrient dense. Baby teas and juices should not be given to infants as they do not have much nutrient value<sup>6</sup></p> <p>18. Complementary food products should be labelled in the language of the targeted population and be acceptable to them, according to their culture. The products should also have information on how to prepare the food<sup>6</sup></p> <p>19. Moreover, these products should not have images of bottle feeding on them or recommend it in any way<sup>6</sup></p> <p>20. If needed, commercial 'baby' foods should be purchased and distributed to mothers or products recommended to mothers, for infants over 6 months of age, that have the most nutritional value<sup>6</sup></p> <p>21. It is recommended that children over the age of 12 months eat the same foods as older children<sup>6</sup></p>                                                                                                                                                                                                                                                                                                                                                                                                                                                                                                                                                 |
| <p><b>IV. Caring for care-givers</b></p> | <p>1. Efforts should be made to increase caregivers' coping capacity because the number of caregivers is often reduced during emergencies and stress levels increase, so psychological support and encouragement plays an important role in enhancing optimal IYCF-E practices<sup>1, 2, 15, 17, 18</sup></p> <p>2. Treat the mother during illness, keep the infant close to the mother and do not stop breastfeeding. The mother should be educated on the appropriate method of milk expression as she can maintain breastmilk flow through milk expression<sup>17, 24</sup></p> <p>3. Breastfeeding mothers require identification, protection and active support. Conflict situations and displacement can negatively affect maternal confidence and breastfeeding practices. Breastfeeding mothers tend to stop or reduce breastfeeding in such situations and thus a lot of support and counselling should be provided to newly arriving refugee mothers, caregivers and infants with special needs (orphans and unaccompanied children)<sup>2, 5, 6, 12, 17, 18, 21, 23</sup></p> <p>4. Provide restorative care to mothers in case of trauma, stress, sexual violence, grief or infant rejection<sup>24</sup></p> <p>5. Adequately trained and skilled staff should support mothers with difficulties in breastfeeding their infants and provide private safe spaces for mothers to breastfeed and to connect with other mothers. Access to cleaning facilities should also be provided to mothers to wash feeding utensils, especially to mothers who are formula feeding. Prioritize mothers of infants and young children for basic screening of childhood illnesses, access to registration and basic services, shelter and non-food items<sup>2, 6, 10, 15, 18</sup></p> <p>6. It should be ensured that mothers/caregivers of artificially fed infants are given targeted support and receive counselling as well as kits for preparing BMS safely, including soap, fuel, water purification tablets<sup>2, 18</sup></p> |
| <p><b>V. Protecting Children</b></p>     | <p>1. Artificially-fed infants need more protection and support than breast-fed children<sup>6, 10</sup></p> <p>2. Infants are at higher risk of malnutrition and illness like diarrhea and chest infections if they are being fed infant formula. In emergency conditions, this could be fatal<sup>2, 6, 10, 11</sup></p> <p>3. In case the infant is ill (e.g. if the infant has diarrhea), continue feeding the infant since breastmilk contains water to replace losses through diarrhea and important minerals and vitamins to help prevent dehydration. It also contains proteins to help strengthen the immune system of the baby. Give smaller amounts of breastfeed and more frequently if the infant's appetite is reduced. However, in serious or prolonged cases of diarrhea, rehydration therapy may be required<sup>6, 10, 11, 15, 26</sup></p> <p>4. Newborn infants are the most vulnerable group which should be targeted and ensured that they are exclusively breast fed and artificial feeding is prevented<sup>2, 6, 12, 16, 21, 23</sup></p>                                                                                                                                                                                                                                                                                                                                                                                                                                                                                                                                                                                                                                                                                                                                                                                                                                                                                                                                                                      |

|                                |                                                                                                                                                                                                                                                                                                                                                                                                                                                                                                                                                                                                                                                                                                                                                                                                                                                                                                                                                                                                                                                                                                                                                                                                                                                                                                                                                                                                                                                                                                                                                                                                                                                                                                                                                                                                                                                                                                                                                                                                                                                                                                                                                                                                                                                                                                                                                                      |
|--------------------------------|----------------------------------------------------------------------------------------------------------------------------------------------------------------------------------------------------------------------------------------------------------------------------------------------------------------------------------------------------------------------------------------------------------------------------------------------------------------------------------------------------------------------------------------------------------------------------------------------------------------------------------------------------------------------------------------------------------------------------------------------------------------------------------------------------------------------------------------------------------------------------------------------------------------------------------------------------------------------------------------------------------------------------------------------------------------------------------------------------------------------------------------------------------------------------------------------------------------------------------------------------------------------------------------------------------------------------------------------------------------------------------------------------------------------------------------------------------------------------------------------------------------------------------------------------------------------------------------------------------------------------------------------------------------------------------------------------------------------------------------------------------------------------------------------------------------------------------------------------------------------------------------------------------------------------------------------------------------------------------------------------------------------------------------------------------------------------------------------------------------------------------------------------------------------------------------------------------------------------------------------------------------------------------------------------------------------------------------------------------------------|
|                                | <ol style="list-style-type: none"> <li>5. Support breastfeeding as the best way to safeguard infants against cholera. Infants with cholera should continue breastfeeding as soon as they are able to suckle, and mothers with cholera should re-initiate breastfeeding as soon as they are stable<sup>12</sup></li> <li>6. Efforts should be made to protect cholera-free breast-fed babies from cross-contamination<sup>12</sup></li> <li>7. IYCF managers, field staff and registration staff should collaborate and ensure screening of infants at registration to identify and refer infants at risk or those who are highly vulnerable (i.e. orphans and unaccompanied infants and young children, non-breastfed infants &lt;6 months, ill infants or malnourished infants) and establish services to give these vulnerable infants nutritional support<sup>2, 6, 12, 16, 18, 21, 23</sup></li> <li>8. Prioritize support service:       <ol style="list-style-type: none"> <li>a. For re lactation: Prioritize non-breastfed infants 0 - &lt;6 months or of 0 - &lt;2 months whose mother/wet nurse is willing to re lactate</li> <li>b. Re-establish exclusive breastfeeding: Always prioritize infants aged 0 - &lt;2 months (including newborns). Infants 0 - &lt;4 months are a priority, but it's an ideal situation for infants 0 - &lt;6 months</li> <li>c. BMS provision and associated support services: prioritize not breastfed infants who are &lt;6 months<sup>3</sup></li> </ol> </li> <li>9. The psychosocial impact of discontinued breastfeeding on children whose mothers have died or are no longer able to breastfeed should also be considered and support services should be set up to address this<sup>12, 16</sup></li> <li>10. Consideration should also be given to special needs of artificially fed children (0-23 months) and PLW (i.e. insecticide treated mosquito nets; hygiene items including soap and washing containers; cooking and eating items; breastfeeding shawls; blankets and infant/young child clothing and shoes with thermal needs considered; potties, diapers), with a particular preference for items that can be locally sourced<sup>2</sup></li> </ol>                                                                                                                                                    |
| <p><b>VI. Malnutrition</b></p> | <ol style="list-style-type: none"> <li>1. Ensure availability of endorsed nutritional strategies in policies and guidelines and establish cross-sectoral IYCG working group to discuss challenges, needs and success<sup>2</sup></li> <li>2. IYCF teams should coordinate and generate a treatment plan where mothers should be admitted at stabilization centers along with her children where they would be provided with nutritional support and counselling to improve lactation<sup>2</sup></li> <li>3. Select an IYCF specialist from each nutrition post or community group<sup>2</sup></li> <li>4. Standardize IYCF messages for caregivers and PLWs with children of 0-23 months and incorporate IYCF indicators in the monitoring system<sup>2</sup></li> <li>5. Develop standard procedure for health workers for identification and referral of malnourished children<sup>2</sup></li> <li>6. Promote IYCF practices (i.e. early initiation, exclusive breastfeeding and complementary feeding)<sup>2</sup></li> <li>7. Timely introduction of complementary food in infants of 6-9 months<sup>2</sup></li> <li>8. Micronutrients should be distributed to all PLWs in form of powders and tablets<sup>2</sup></li> <li>9. Malnutrition treatment and prevention programs should incorporate and prioritize infant and young child feeding in their agenda<sup>2, 12</sup></li> <li>10. Efforts should be made to investigate the underlying cause of malnutrition and measures should be taken to correct it<sup>1, 2, 10</sup></li> <li>11. Monitor nutritional status of mothers, infants and young children with the purpose of identifying, assessing, preventing and treating malnourished children<sup>1, 2, 10</sup></li> <li>12. Strong referral mechanisms should be put in place for acute malnutrition to cater to worsening nutritional status of infants<sup>2, 12</sup></li> <li>13. Admit malnourished children along with their mothers to a nutritional rehabilitation program<sup>12, 21, 24</sup></li> <li>14. There should be community-based management of acute malnutrition, if conditions are favorable. In disasters, supplementary feeding should be the primary strategy for prevention and treatment of moderate acute malnutrition (MAM). Depending on vulnerable population groups and malnutrition level/risk</li> </ol> |



|                                                                                      |                                                                                                                                                                                                                                                                                                                                                                                                                                                                                                                                                                                                                                                                                                                                                                                                                                                                                                                                                                                                                                                                                                                                                                                                                                                                                                                                                                                                                                                                                                                                                                                                                                                                                                                                                                                                                                                                                                                                                                                                                                                                                                                                                                                                                                                                                                                                                                                                                                                                                                                                                                                                                                                                                                                                                                                                                                                                                                                                                                                                                                                                                                                                                                                                                                                                                                       |
|--------------------------------------------------------------------------------------|-------------------------------------------------------------------------------------------------------------------------------------------------------------------------------------------------------------------------------------------------------------------------------------------------------------------------------------------------------------------------------------------------------------------------------------------------------------------------------------------------------------------------------------------------------------------------------------------------------------------------------------------------------------------------------------------------------------------------------------------------------------------------------------------------------------------------------------------------------------------------------------------------------------------------------------------------------------------------------------------------------------------------------------------------------------------------------------------------------------------------------------------------------------------------------------------------------------------------------------------------------------------------------------------------------------------------------------------------------------------------------------------------------------------------------------------------------------------------------------------------------------------------------------------------------------------------------------------------------------------------------------------------------------------------------------------------------------------------------------------------------------------------------------------------------------------------------------------------------------------------------------------------------------------------------------------------------------------------------------------------------------------------------------------------------------------------------------------------------------------------------------------------------------------------------------------------------------------------------------------------------------------------------------------------------------------------------------------------------------------------------------------------------------------------------------------------------------------------------------------------------------------------------------------------------------------------------------------------------------------------------------------------------------------------------------------------------------------------------------------------------------------------------------------------------------------------------------------------------------------------------------------------------------------------------------------------------------------------------------------------------------------------------------------------------------------------------------------------------------------------------------------------------------------------------------------------------------------------------------------------------------------------------------------------------|
|                                                                                      | <p>of an increase in acute malnutrition, supplementary feeding can be blanket or targeted<sup>2</sup></p> <ol style="list-style-type: none"> <li>15. Pre-formulated therapeutic milk products or dried skimmed milk (DSM) may be used to treat cases of severe acute malnutrition (SAM). However, attention must be given to ensure that supplementary food aid commodities are carefully regulated and distributed to only target vulnerable groups<sup>4, 9</sup></li> <li>16. Therapeutic milks are not appropriate for BMS use. Therapeutic milk like F75 and F100 should be used for the treatment of children with severe acute malnutrition (SAM). It can be given to infants less than 6 months. SAM children require appropriate treatment at right time with immediate referral<sup>28</sup></li> <li>17. Cash/voucher programmes (conditional) could be started that promote good nutrition outcomes i.e. preventing malnutrition. Unconditional cash programs should be promoted in case of food security and livelihood. But in this case optimal IYCF practices should be considered through an expert. Women should be educated and sensitized for appropriate use on food and nonfood items for children of 0-23 months<sup>2</sup></li> <li>18. Community support networks should be educated on the prevention and treatment of acute malnutrition<sup>2</sup></li> </ol>                                                                                                                                                                                                                                                                                                                                                                                                                                                                                                                                                                                                                                                                                                                                                                                                                                                                                                                                                                                                                                                                                                                                                                                                                                                                                                                                                                                                                                                                                                                                                                                                                                                                                                                                                                                                                                                                                                           |
| <p><b>VII.</b> The acute phase of emergencies (prevention through interventions)</p> | <ol style="list-style-type: none"> <li>1. In case of an emergency, interventions should start immediately to minimize the emergency's negative impact on feeding practices and every agency should develop a policy on infant feeding in emergencies, focusing on supporting caregivers and nutritional needs children<sup>1, 2, 4, 23</sup></li> <li>2. An appropriate agency should be appointed and resourced at the start of an emergency to co-ordinate IYCF-E practices and ensure the implementation of policies and it should be conveyed to all agencies working in the area<sup>13</sup></li> <li>3. In emergencies, donations of BMS are not needed and may put endanger infant lives due to poor hygienic conditions<sup>2, 4, 10, 12, 13, 23</sup></li> <li>4. If emergencies occur in places where there was already high infant formula use, promotion of IYCF-E can be even more difficult and WHO, and its developmental partners, along with local authorities and/or the national Nutrition Cluster (if activated) should ensure that appropriate IYCF-E is adequately promoted, protected and supported<sup>2, 10, 12, 23</sup></li> <li>5. Interventions should be undertaken to increase the prevalence of appropriate IYCF-E practices such as culturally-appropriate behavior -change approaches, along with capacity-building, to increase the rate of exclusive breastfeeding<sup>12, 13, 23</sup></li> <li>6. A joint statement for protection and support of appropriate IYCF-E should be released and ensured that BMS donations and distributions are carefully monitored<sup>2, 4, 7, 12, 13, 23</sup></li> <li>7. WHO, its developmental partners, local governments and national Nutrition Cluster (if activated) should work on this and provide this information to all staff, potential donors (including governments and the military) and the media, and ensure that no wrong messages are being disseminated both in emergency preparedness and particularly during the early phase of an emergency response<sup>2, 4, 12, 13, 23</sup></li> <li>8. Breastfeeding and IYCF support should be a major component of all services for mothers, infants and children and measures should be put in place to ensure that their needs are met in the early stages of an emergency<sup>2, 4, 7, 16</sup></li> <li>9. Support should also be provided to caregivers and infants with special needs (orphans and unaccompanied children)<sup>2, 6, 12, 14-16, 21, 23</sup></li> <li>10. It should be ensured that artificial feeding is strictly restricted to the targeted group of infants that require it and mothers who need help with breastfeeding are provided lactation support by mobilizing 'local breastfeeding facilitators'<sup>7, 10</sup></li> <li>11. Lactation should be reinforced by educating mothers to breastfeed every 2-3 hours at 'breastfeeding stations' scattered across refugee sites<sup>7</sup></li> <li>12. One guideline also suggested the use of 'chlorpromazine' to stimulate milk production, according to the protocol and also 'wet nurses' to feed the infant<sup>7</sup></li> <li>13. Milk banks can also be used as an alternative to BMS and also as a source of employment in emergency setting<sup>7, 10</sup></li> </ol> |

|                                                                                                                                                                                                                                                                                                                                                                                                                                                                                    |                                                                                                                                                                                                                                                                                                                                                                                                                                                                                                                                                                                                                                                                                                                                                                                                                                                                                                                                                                                                                                                                                                                                                                                                                                                                                                                                                                                                                                                                                                                                                                                                                                                                                                                                                                                                                                                                                                                                                                                                                                                                                                                                                                                                                                                                                                                                                                                                                                                                                                                                                                                                                                                                                                                                                                                                                                                                                                                                                                                                                                                                                                                                                                                                                                                                                                                                                                                                                                                                                                                                                                                                                                                                                                                                                                                                                                                                                                                                                                                                                                                                                                                                                                                                                                                                                                                                                                                                                          |
|------------------------------------------------------------------------------------------------------------------------------------------------------------------------------------------------------------------------------------------------------------------------------------------------------------------------------------------------------------------------------------------------------------------------------------------------------------------------------------|--------------------------------------------------------------------------------------------------------------------------------------------------------------------------------------------------------------------------------------------------------------------------------------------------------------------------------------------------------------------------------------------------------------------------------------------------------------------------------------------------------------------------------------------------------------------------------------------------------------------------------------------------------------------------------------------------------------------------------------------------------------------------------------------------------------------------------------------------------------------------------------------------------------------------------------------------------------------------------------------------------------------------------------------------------------------------------------------------------------------------------------------------------------------------------------------------------------------------------------------------------------------------------------------------------------------------------------------------------------------------------------------------------------------------------------------------------------------------------------------------------------------------------------------------------------------------------------------------------------------------------------------------------------------------------------------------------------------------------------------------------------------------------------------------------------------------------------------------------------------------------------------------------------------------------------------------------------------------------------------------------------------------------------------------------------------------------------------------------------------------------------------------------------------------------------------------------------------------------------------------------------------------------------------------------------------------------------------------------------------------------------------------------------------------------------------------------------------------------------------------------------------------------------------------------------------------------------------------------------------------------------------------------------------------------------------------------------------------------------------------------------------------------------------------------------------------------------------------------------------------------------------------------------------------------------------------------------------------------------------------------------------------------------------------------------------------------------------------------------------------------------------------------------------------------------------------------------------------------------------------------------------------------------------------------------------------------------------------------------------------------------------------------------------------------------------------------------------------------------------------------------------------------------------------------------------------------------------------------------------------------------------------------------------------------------------------------------------------------------------------------------------------------------------------------------------------------------------------------------------------------------------------------------------------------------------------------------------------------------------------------------------------------------------------------------------------------------------------------------------------------------------------------------------------------------------------------------------------------------------------------------------------------------------------------------------------------------------------------------------------------------------------------------------------|
| <p>1<br/>2<br/>3<br/>4<br/>5<br/>6<br/>7<br/>8<br/>9<br/>10<br/>11<br/>12<br/>13<br/>14<br/>15<br/>16<br/>17<br/>18<br/>19<br/>20<br/>21<br/>22<br/>23<br/>24<br/>25<br/>26<br/>27<br/>28<br/>29<br/>30<br/>31<br/>32<br/>33<br/>34<br/>35<br/>36<br/>37<br/>38<br/>39<br/>40<br/>41<br/>42<br/>43<br/>44<br/>45<br/>46<br/>47<br/>48<br/>49<br/>50<br/>51<br/>52<br/>53<br/>54<br/>55<br/>56<br/>57<br/>58<br/>59<br/>60</p> <p>VIII. Assessment, intervention and monitoring</p> | <ol style="list-style-type: none"> <li>1. In emergencies, co-ordinate, promote and carefully monitor optimal feeding in infants and young children<sup>1, 2, 15, 23</sup></li> <li>2. There should be systematic and comprehensive monitoring systems to track all infant feeding products being distributed<sup>13</sup></li> <li>3. Conduct mother – child pair assessment of HIV positive mothers and for individual child, assessment for artificial feeding (i.e. Simple Assessment and Full Assessment)<sup>3, 24</sup></li> <li>4. In areas with high prevalence of HIV, the risk of infant getting HIV via breastfeeding should be weighed against the risk of facing infection and malnutrition as a consequence of not being breastfed<sup>1</sup></li> <li>5. The prevalence of HIV in the affected population, knowledge of HIV status, and availability of counselling and testing facilities should be assessed (including pre-emergency estimates) using secondary sources and relevant information from health information systems<sup>10</sup></li> <li>6. In emergencies, implement an IYCF-E program focusing on infant feeding provision, with robust mechanisms that estimate the number of children that don't have access to breast milk and then provide them with targeted supply of infant formula<sup>12</sup></li> <li>7. Monitor the nutritional status of infants and young children, particularly weight monitoring for those receiving formula feed and assess intake, urination frequency, activity level, whether infant is feeding vigorously and weight gain<sup>6, 10, 12, 15, 24, 26</sup></li> <li>8. Establish a strong referral system to treat acute malnutrition should the infant's nutritional status deteriorate<sup>2, 12</sup></li> <li>9. To monitor and to conduct rapid assessments, gather information and statistics regarding: demographic profile, morbidity, mortality, predominant feeding practice, reported feeding problems for infants and young children including problems related to breastfeeding and complementary feeding, pre-crisis approach to orphaned children, security risks and availability of conspicuous BMS products and bottles/ teats/ breast pumps<sup>7, 10, 21, 23</sup></li> <li>10. To monitor and assess, use qualitative methods to gather data regarding:       <ol style="list-style-type: none"> <li>a. Appropriate complementary foods in the general ration or targeted feeding programs</li> <li>b. Maternal and child health facilities including antenatal, delivery, postnatal and child care</li> <li>c. Capacity of potential support-givers including breastfeeding mothers, trained health workers, trained counselors and experienced women from the community</li> <li>d. Factors that may disturb breastfeeding practices</li> <li>e. Key decision-makers at household, community and local health facility level that may influence infant and young child feeding practices</li> <li>f. Cultural barriers affected practices of re-lactation, wet-nursing, etc.</li> <li>g. General health environment including: water and sanitation, housing, facilities of food preparation and cooking<sup>10, 21, 23, 28</sup></li> </ol> </li> <li>11. To monitor and assess, use quantitative methods to gather data regarding:       <ol style="list-style-type: none"> <li>a. Estimated number of unaccompanied and accompanied children under two years of age, pregnant and lactating women</li> <li>b. Statistics regarding morbidity, mortality, and levels of malnutrition</li> <li>c. Information concerning nutritional adequacy of food rations</li> <li>d. Pre-crisis and recent patterns in infant and young child feeding practices</li> <li>e. Availability and management of BMS in accordance to The International Code<sup>2, 10, 21, 23</sup></li> </ol> </li> <li>12. Governments should monitor and apply The International Code collaboratively with the assistance of International agencies such as WHO and UNICEF, NGO's, refugee camp staff, professional groups and customer organizations to ensure that manufacturers and distributors of BMS remain within the scope of the established Code<sup>2, 10, 25</sup></li> <li>13. Manufacturers and distributors should monitor their market prices and the practices of their marketing personnel in accordance to The Code. Non-</li> </ol> |
|------------------------------------------------------------------------------------------------------------------------------------------------------------------------------------------------------------------------------------------------------------------------------------------------------------------------------------------------------------------------------------------------------------------------------------------------------------------------------------|--------------------------------------------------------------------------------------------------------------------------------------------------------------------------------------------------------------------------------------------------------------------------------------------------------------------------------------------------------------------------------------------------------------------------------------------------------------------------------------------------------------------------------------------------------------------------------------------------------------------------------------------------------------------------------------------------------------------------------------------------------------------------------------------------------------------------------------------------------------------------------------------------------------------------------------------------------------------------------------------------------------------------------------------------------------------------------------------------------------------------------------------------------------------------------------------------------------------------------------------------------------------------------------------------------------------------------------------------------------------------------------------------------------------------------------------------------------------------------------------------------------------------------------------------------------------------------------------------------------------------------------------------------------------------------------------------------------------------------------------------------------------------------------------------------------------------------------------------------------------------------------------------------------------------------------------------------------------------------------------------------------------------------------------------------------------------------------------------------------------------------------------------------------------------------------------------------------------------------------------------------------------------------------------------------------------------------------------------------------------------------------------------------------------------------------------------------------------------------------------------------------------------------------------------------------------------------------------------------------------------------------------------------------------------------------------------------------------------------------------------------------------------------------------------------------------------------------------------------------------------------------------------------------------------------------------------------------------------------------------------------------------------------------------------------------------------------------------------------------------------------------------------------------------------------------------------------------------------------------------------------------------------------------------------------------------------------------------------------------------------------------------------------------------------------------------------------------------------------------------------------------------------------------------------------------------------------------------------------------------------------------------------------------------------------------------------------------------------------------------------------------------------------------------------------------------------------------------------------------------------------------------------------------------------------------------------------------------------------------------------------------------------------------------------------------------------------------------------------------------------------------------------------------------------------------------------------------------------------------------------------------------------------------------------------------------------------------------------------------------------------------------------------------------------|

|                                                                |                                                                                                                                                                                                                                                                                                                                                                                                                                                                                                                                                                                                                                                                                                                                                                                                                                                                                                                                                                                                                                                                                                                                                                                                                                                                                                                                                                                                                                                                                                                                                                                                                                                                                                                                                                                                                                                                                                                                                                                                                                                                                                                                                                                                                                                                                                                                                                                                                                                                                                                                                                                                                                                                                                                                                                                                                                                                                                                                                                                                                                                                                                                                                                                                                                                                                                                                                                                                                                                                                         |
|----------------------------------------------------------------|-----------------------------------------------------------------------------------------------------------------------------------------------------------------------------------------------------------------------------------------------------------------------------------------------------------------------------------------------------------------------------------------------------------------------------------------------------------------------------------------------------------------------------------------------------------------------------------------------------------------------------------------------------------------------------------------------------------------------------------------------------------------------------------------------------------------------------------------------------------------------------------------------------------------------------------------------------------------------------------------------------------------------------------------------------------------------------------------------------------------------------------------------------------------------------------------------------------------------------------------------------------------------------------------------------------------------------------------------------------------------------------------------------------------------------------------------------------------------------------------------------------------------------------------------------------------------------------------------------------------------------------------------------------------------------------------------------------------------------------------------------------------------------------------------------------------------------------------------------------------------------------------------------------------------------------------------------------------------------------------------------------------------------------------------------------------------------------------------------------------------------------------------------------------------------------------------------------------------------------------------------------------------------------------------------------------------------------------------------------------------------------------------------------------------------------------------------------------------------------------------------------------------------------------------------------------------------------------------------------------------------------------------------------------------------------------------------------------------------------------------------------------------------------------------------------------------------------------------------------------------------------------------------------------------------------------------------------------------------------------------------------------------------------------------------------------------------------------------------------------------------------------------------------------------------------------------------------------------------------------------------------------------------------------------------------------------------------------------------------------------------------------------------------------------------------------------------------------------------------------|
|                                                                | <p>governmental organizations (NGO's) along with professional groups, institutions and concerned individuals should monitor and criticize manufacturers and distributors that don't follow the principles of The Code<sup>10, 25</sup></p> <ol style="list-style-type: none"> <li>14. Review and monitor the following:       <ol style="list-style-type: none"> <li>a. Advice and knowledge regarding breastfeeding and BMS usage</li> <li>b. Estimate the number of women breastfeeding, weaning and incorporating the use of BMS and bottle in the feed of their infant and young children</li> <li>c. Constraints associated with hygienic BMS preparation</li> <li>d. Availability and management of BMS<sup>4, 7, 10, 20, 21, 23, 25</sup></li> </ol> </li> <li>15. Promote importance of breastfeeding and optimal hygiene practices especially handwashing before preparation of BMS. We should also dispel myths among mothers regarding breastfeeding<sup>28</sup></li> <li>16. Capacity Building of IYCF staff and outreach workers on nutrition (optimal IYCF practices, lifesaving IYCF practices, rapid IYCF assessment and detection of poor IYCF practices)<sup>2</sup></li> </ol>                                                                                                                                                                                                                                                                                                                                                                                                                                                                                                                                                                                                                                                                                                                                                                                                                                                                                                                                                                                                                                                                                                                                                                                                                                                                                                                                                                                                                                                                                                                                                                                                                                                                                                                                                                                                                                                                                                                                                                                                                                                                                                                                                                                                                                                                                      |
| <p><b>IX.</b> Breastfeeding, HIV, and other considerations</p> | <ol style="list-style-type: none"> <li>1. Generate policies on empowering women with HIV on decision making and infant feeding<sup>8</sup></li> <li>2. IYCF staff should take appropriate measures to prevent mother-to-child transmission of HIV, as well as focus on improving child survival from HIV<sup>2</sup></li> <li>3. Promote the use of optimal infant and young child feeding guidelines when the HIV status of the mother is unknown or she is HIV negative<sup>2-4, 10, 23, 24, 29</sup></li> <li>4. In case of unavailability of HIV-testing, it is recommended to breastfeed the infant for six months, followed by adequate complementary feeding and continued breast feeding for two years<sup>24, 29</sup></li> <li>5. Mothers should know their HIV status and receive appropriate counselling. Those diagnosed as HIV positive should make an informed decision about feeding options by balancing the prevention of HIV transmission with the nutritional requirements of infants<sup>1, 2, 4, 8, 10, 12, 23, 24, 29</sup></li> <li>6. HIV positive mother should exclusively breastfeed her child for first 6 months of life unless replacement feeding is affordable, sustainable and safe for their infants. In case, replacement feeding is not acceptable, then complementary feeding with continued breastfeeding at 6 months is recommended, while mother and baby will be assessed regularly<sup>2, 10, 24</sup></li> <li>7. Supportive arrangements and personal attachment for HIV positive mothers helps to reduce isolation, build confidence, reduce conflicting messages, encourage age appropriate feeding, provide privacy and educate family members<sup>24</sup></li> <li>8. Ensure access to sustainable medical care for mothers with an HIV positive status by supporting the provision of ART and ARV. If due to emergencies, the supply of these medications is hindered then immediate action should be taken for its re-establishment<sup>12, 23, 24, 29</sup></li> <li>9. In circumstances during acute emergencies, when Antiretroviral Drug (ARVs) are unavailable, it is recommended to breastfeed HIV-exposed infants to increase his/her survival<sup>2, 3</sup></li> <li>10. In emergency contexts, HIV-positive mothers should be supported to initiate or continue exclusive breastfeeding/ continued breastfeeding with adequate complementary feeding depending upon the age of the infant. The risk of infection or malnutrition through the use of Breast Milk Substitutes (BMS) outweighs the risk of HIV transmission through breastfeeding<sup>2, 8, 12, 21, 23, 24</sup></li> <li>11. Support replacement feeding <i>only</i> when this option meets the AFASS criteria, i.e. acceptable, feasible, affordable, sustainable and safe<sup>3-5, 23, 24, 29</sup></li> <li>12. All HIV- positive mothers should receive full support and get regular follow ups<sup>2, 29</sup></li> <li>13. HIV-positive and caregivers of children born to HIV-positive mothers, who have chosen to discontinue or not breastfeed, should be provided with targeted, appropriate, breast milk substitutes (Ready to Use Formula (RUIF) and Powdered Infant Formula (PIF)<sup>2, 12</sup></li> <li>14. Promote and support specific counseling concerned with risks of mixed feeding and HIV transmission. Additionally, ensure the provision of Safe BMS kits, i.e. adapted to the type of BMS administered<sup>2, 12</sup></li> </ol> |

|  |                                                                                                                                                                                                                                                                                                                                                                                                                                                                                                                                                                                                                                                                                                                                                                                                                                           |
|--|-------------------------------------------------------------------------------------------------------------------------------------------------------------------------------------------------------------------------------------------------------------------------------------------------------------------------------------------------------------------------------------------------------------------------------------------------------------------------------------------------------------------------------------------------------------------------------------------------------------------------------------------------------------------------------------------------------------------------------------------------------------------------------------------------------------------------------------------|
|  | <p>15. Services and activities linked to the Prevention/Elimination of Mother-to-Child Transmission (E/PMTCT) should be provided routinely as a part of nutritional interventions<sup>2, 12</sup></p> <p>16. Measures taken by ICYF-E staff should be sensitive and should avoid actions that may exacerbate any HIV-related stigma<sup>2, 12</sup></p> <p>17. Wet nursing should also be considered in case of HIV positive mothers and for infants who have lost their mothers. It should be administered by any person (other than mother). The wet nurse should be counselled before and after wet nursing to prevent her from catching infection<sup>10, 12, 24, 29</sup></p> <p>18. WHO recommends flash heated breastmilk rather than boiling breast milk to prevent significant nutritional damage of breastmilk<sup>29</sup></p> |
|--|-------------------------------------------------------------------------------------------------------------------------------------------------------------------------------------------------------------------------------------------------------------------------------------------------------------------------------------------------------------------------------------------------------------------------------------------------------------------------------------------------------------------------------------------------------------------------------------------------------------------------------------------------------------------------------------------------------------------------------------------------------------------------------------------------------------------------------------------|

## References:

1. WHO. Guiding principles for feeding infants and young children during emergencies. 2004.
2. UNHCR, children St. Infant and Young Child Feeding in Refugee Situations: A Multi-Sectoral Framework for Action. 2018 May, 2018.
3. UNHCR. Infant and young child feeding practices Standard Operating Procedures for the Handling of Breastmilk Substitutes (BMS) in Refugee Situations for children 0-23 months. 2015 August 2015.
4. UNHCR. UNHCR Policy Related To The Acceptance, Distribution And Use Of Milk Products In Refugee Settings 2006.
5. Save the Children U, Food Security and Nutrition Network. ICFY-E Toolkit: Summary of Feeding the Non-breastfed child 6- 24 months of Age 2007.
6. Refugees UHCF. Interim Operational Considerations for the feeding support of Infants and Young Children under 2 years of age in refugee and migrant transit settings in Europe. 2015.
7. OXFAM. Feeding in Emergencies For Infants Under Six Months: Practical Guidelines 1996.
8. Machel G. Impact of Armed Conflict on Children. United Nations; 1996 26 August 1996.
9. Joint UNICEF U, WFP, WHO Statement Policy on infant feeding in the Balkan Region.
10. ENN. Infant Feeding in Emergencies: Policy, Strategy and Practice. 1999 May 1999.
11. Association ILC. Breastfeeding: A Vital Emergency Response. Are You Ready? . 2009. p. 2.
12. ACF-International. Infant and Young Child Feeding in Emergencies. 2015 December 2015.
13. Borrel A, Taylor A, McGrath M, Seal A, Hormann E, Phelps L, et al. From policy to practice: challenges in infant feeding in emergencies during the Balkan crisis. *Disasters*. 2001;25(2):149-63.
14. Program WIEPoB. Infant and Young Child Feeding in Emergency Situations. 2005.
15. Pediatrics AAO. Infant feeding in disasters and emergencies. 2015.
16. Save the Children U, Food Security and Nutrition Network. IYCF-E Toolkit: Summary of Operational Guidance on ICF-E Key Points and WHA Resolution. 2007.
17. UNHCR. HOW TO GUIDE reproductive health in refugee setting (Strengthening Safe Motherhood Services). 1999 November 1998.
18. Children St. Assessment of infant and young child feeding practices among refugees on Lesbos Island, Greece. 2016.
19. Focus I. The Code and infant feeding in emergencies. 2009 May 2009.
20. USAID TSG, International Medical Corps Camp-based Barrier Analysis of Early Initiation of Breastfeeding, Iron-rich Food Consumption, and Early Antenatal Care Seeking Behaviors of Syrian Refugees in Azraq Camp, Jordan. 2016.

- 1  
2  
3 21. WHO, UNICEF, LINKAGES, IBFAN, ENN. Infant feeding in emergencies Module 1 (for emergency  
4 relief staff). 2001 November 2001.  
5  
6 22. WHO. WHA RESOLUTION 47.5  
7  
8 Infant and young child nutrition. 1994.  
9  
10 23. Group IC. Infant and Young Child Feeding in Emergencies Operational Guidance for Emergency  
11 Relief Staff and Programme Managers  
12 2017 October 2017.  
13 24. ENN, IBFAN-GIFA, Fondation Terre des hommes, Action Contre la Faim, CARE USA, LINKAGES, et  
14 al. Infant feeding in emergencies Module 2 Version 1.1 (for health and nutrition workers in emergency  
15 situations). 2007.  
16 25. WHO. International Code of Marketing of Breast-milk Substitutes. Geneva; 1981.  
17 26. ACF-International. Baby friendly spaces  
18  
19 Holistic approach for Pregnant, Lactating Women and their very young children in Emergency. 2014  
20 December 2014.  
21 27. Action Against Hunger U. Infant Feeding and Weaning Report 2000.  
22 28. UNICEF. UNICEF Guidance on the provision and use of breastmilk substitutes in humanitarian  
23 settings. 2018 June 2018.  
24 29. UNHCR. Guidance on Infant feeding and HIV in the context of refugees and displaced  
25 populations. 2008 April 2008.  
26  
27  
28  
29  
30  
31  
32  
33  
34  
35  
36  
37  
38  
39  
40  
41  
42  
43  
44  
45  
46  
47  
48  
49  
50  
51  
52  
53  
54  
55  
56  
57  
58  
59  
60

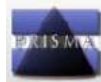

# PRISMA 2009 Checklist

| Section/topic                      | #  | Checklist item                                                                                                                                                                                                                                                                                              | Reported on page # |
|------------------------------------|----|-------------------------------------------------------------------------------------------------------------------------------------------------------------------------------------------------------------------------------------------------------------------------------------------------------------|--------------------|
| <b>TITLE</b>                       |    |                                                                                                                                                                                                                                                                                                             |                    |
| Title                              | 1  | Identify the report as a systematic review, meta-analysis, or both.                                                                                                                                                                                                                                         | 1                  |
| <b>ABSTRACT</b>                    |    |                                                                                                                                                                                                                                                                                                             |                    |
| Structured summary                 | 2  | Provide a structured summary including, as applicable: background; objectives; data sources; study eligibility criteria, participants, and interventions; study appraisal and synthesis methods; results; limitations; conclusions and implications of key findings; systematic review registration number. | 2                  |
| <b>INTRODUCTION</b>                |    |                                                                                                                                                                                                                                                                                                             |                    |
| Rationale                          | 3  | Describe the rationale for the review in the context of what is already known.                                                                                                                                                                                                                              | 4,5                |
| Objectives                         | 4  | Provide an explicit statement of questions being addressed with reference to participants, interventions, comparisons, outcomes, and study design (PICOS).                                                                                                                                                  | 4,5                |
| <b>METHODS</b>                     |    |                                                                                                                                                                                                                                                                                                             |                    |
| Protocol and registration          | 5  | Indicate if a review protocol exists, if and where it can be accessed (e.g., Web address), and, if available, provide registration information including registration number.                                                                                                                               |                    |
| Eligibility criteria               | 6  | Specify study characteristics (e.g., PICOS, length of follow-up) and report characteristics (e.g., years considered, language, publication status) used as criteria for eligibility, giving rationale.                                                                                                      | 5                  |
| Information sources                | 7  | Describe all information sources (e.g., databases with dates of coverage, contact with study authors to identify additional studies) in the search and date last searched.                                                                                                                                  | 6                  |
| Search                             | 8  | Present full electronic search strategy for at least one database, including any limits used, such that it could be repeated.                                                                                                                                                                               | 6                  |
| Study selection                    | 9  | State the process for selecting studies (i.e., screening, eligibility, included in systematic review, and, if applicable, included in the meta-analysis).                                                                                                                                                   | 6                  |
| Data collection process            | 10 | Describe method of data extraction from reports (e.g., piloted forms, independently, in duplicate) and any processes for obtaining and confirming data from investigators.                                                                                                                                  | 6                  |
| Data items                         | 11 | List and define all variables for which data were sought (e.g., PICOS, funding sources) and any assumptions and simplifications made.                                                                                                                                                                       | 6                  |
| Risk of bias in individual studies | 12 | Describe methods used for assessing risk of bias of individual studies (including specification of whether this was done at the study or outcome level), and how this information is to be used in any data synthesis.                                                                                      | NA                 |
| Summary measures                   | 13 | State the principal summary measures (e.g., risk ratio, difference in means).                                                                                                                                                                                                                               | NA                 |
| Synthesis of results               | 14 | Describe the methods of handling data and combining results of studies, if done, including measures of consistency (e.g., $I^2$ ) for each meta-analysis.                                                                                                                                                   | NA                 |



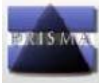

# PRISMA 2009 Checklist

Page 1 of 2

| Section/topic                 | #  | Checklist item                                                                                                                                                                                           | Reported on page # |
|-------------------------------|----|----------------------------------------------------------------------------------------------------------------------------------------------------------------------------------------------------------|--------------------|
| Risk of bias across studies   | 15 | Specify any assessment of risk of bias that may affect the cumulative evidence (e.g., publication bias, selective reporting within studies).                                                             | NA                 |
| Additional analyses           | 16 | Describe methods of additional analyses (e.g., sensitivity or subgroup analyses, meta-regression), if done, indicating which were pre-specified.                                                         | NA                 |
| <b>RESULTS</b>                |    |                                                                                                                                                                                                          |                    |
| Study selection               | 17 | Give numbers of studies screened, assessed for eligibility, and included in the review, with reasons for exclusions at each stage, ideally with a flow diagram.                                          | 7                  |
| Study characteristics         | 18 | For each study, present characteristics for which data were extracted (e.g., study size, PICOS, follow-up period) and provide the citations.                                                             | 7                  |
| Risk of bias within studies   | 19 | Present data on risk of bias of each study and, if available, any outcome level assessment (see item 12).                                                                                                | NA                 |
| Results of individual studies | 20 | For all outcomes considered (benefits or harms), present, for each study: (a) simple summary data for each intervention group (b) effect estimates and confidence intervals, ideally with a forest plot. | NA                 |
| Synthesis of results          | 21 | Present results of each meta-analysis done, including confidence intervals and measures of consistency.                                                                                                  | NA                 |
| Risk of bias across studies   | 22 | Present results of any assessment of risk of bias across studies (see Item 15).                                                                                                                          | N/A                |
| Additional analysis           | 23 | Give results of additional analyses, if done (e.g., sensitivity or subgroup analyses, meta-regression [see Item 16]).                                                                                    | NA                 |
| <b>DISCUSSION</b>             |    |                                                                                                                                                                                                          |                    |
| Summary of evidence           | 24 | Summarize the main findings including the strength of evidence for each main outcome; consider their relevance to key groups (e.g., healthcare providers, users, and policy makers).                     | 16                 |
| Limitations                   | 25 | Discuss limitations at study and outcome level (e.g., risk of bias), and at review-level (e.g., incomplete retrieval of identified research, reporting bias).                                            | 18                 |
| Conclusions                   | 26 | Provide a general interpretation of the results in the context of other evidence, and implications for future research.                                                                                  | 18                 |
| <b>FUNDING</b>                |    |                                                                                                                                                                                                          |                    |
| Funding                       | 27 | Describe sources of funding for the systematic review and other support (e.g., supply of data); role of funders for the systematic review.                                                               | 21                 |

From: Moher D, Liberati A, Tetzlaff J, Altman DG, The PRISMA Group (2009). Preferred Reporting Items for Systematic Reviews and Meta-Analyses: The PRISMA Statement. PLoS Med 6(7): e1000097. doi:10.1371/journal.pmed1000097

For more information, visit: [www.prisma-statement.org](http://www.prisma-statement.org).

Page 2 of 2

For peer review only - <http://bmjopen.bmj.com/site/about/guidelines.xhtml>



# BMJ Open

## A systematic review of Infant and Young Child Feeding Practices in Conflict Areas: What the evidence advocates

|                                 |                                                                                                                                                                                                                                                       |
|---------------------------------|-------------------------------------------------------------------------------------------------------------------------------------------------------------------------------------------------------------------------------------------------------|
| Journal:                        | <i>BMJ Open</i>                                                                                                                                                                                                                                       |
| Manuscript ID                   | bmjopen-2020-036757.R1                                                                                                                                                                                                                                |
| Article Type:                   | Original research                                                                                                                                                                                                                                     |
| Date Submitted by the Author:   | 16-Jun-2020                                                                                                                                                                                                                                           |
| Complete List of Authors:       | Rabbani, Amna; Aga Khan University<br>Padhani, Zahra Ali; Aga Khan University, Paediatrics<br>A. Siddiqui, Faareha; Institute of Business Administration Karachi,<br>Das, Jai K.; Aga Khan University<br>Bhutta, Zulfiqar; Hospital for Sick Children |
| <b>Primary Subject Heading</b>: | Public health                                                                                                                                                                                                                                         |
| Secondary Subject Heading:      | Public health, Nutrition and metabolism                                                                                                                                                                                                               |
| Keywords:                       | PUBLIC HEALTH, Health policy < HEALTH SERVICES ADMINISTRATION & MANAGEMENT, Community child health < PAEDIATRICS                                                                                                                                      |
|                                 |                                                                                                                                                                                                                                                       |

SCHOLARONE™  
Manuscripts



I, the Submitting Author has the right to grant and does grant on behalf of all authors of the Work (as defined in the below author licence), an exclusive licence and/or a non-exclusive licence for contributions from authors who are: i) UK Crown employees; ii) where BMJ has agreed a CC-BY licence shall apply, and/or iii) in accordance with the terms applicable for US Federal Government officers or employees acting as part of their official duties; on a worldwide, perpetual, irrevocable, royalty-free basis to BMJ Publishing Group Ltd ("BMJ") its licensees and where the relevant Journal is co-owned by BMJ to the co-owners of the Journal, to publish the Work in this journal and any other BMJ products and to exploit all rights, as set out in our [licence](#).

The Submitting Author accepts and understands that any supply made under these terms is made by BMJ to the Submitting Author unless you are acting as an employee on behalf of your employer or a postgraduate student of an affiliated institution which is paying any applicable article publishing charge ("APC") for Open Access articles. Where the Submitting Author wishes to make the Work available on an Open Access basis (and intends to pay the relevant APC), the terms of reuse of such Open Access shall be governed by a Creative Commons licence – details of these licences and which [Creative Commons](#) licence will apply to this Work are set out in our licence referred to above.

Other than as permitted in any relevant BMJ Author's Self Archiving Policies, I confirm this Work has not been accepted for publication elsewhere, is not being considered for publication elsewhere and does not duplicate material already published. I confirm all authors consent to publication of this Work and authorise the granting of this licence.

1  
2  
3  
4 **1 A systematic review of Infant and Young Child Feeding Practices in Conflict Areas: What**  
5 **2 the evidence advocates**  
6

7  
8 3 Amna Rabbani<sup>1</sup>, Zahra A. Padhani<sup>1</sup>, Faareha A Siddiqui<sup>2</sup>, Jai K Das<sup>1</sup>, Zulfiqar A Bhutta<sup>3,4</sup>

9  
10 4 1. Division of Women and Child Health, Aga Khan University, Karachi, Pakistan

11 5 2. Institute of Business Administration, Karachi, Pakistan

12 6 3. Center of Excellence in Women and Child Health, Aga Khan University, Karachi, Pakistan

13 7 4. Centre for Global Child Health, The Hospital for Sick Children, Toronto, Canada  
14  
15  
16  
17  
18  
19  
20  
21  
22  
23  
24  
25  
26  
27  
28  
29

30 10 Amna Rabbani - [amnarabbani@gmail.com](mailto:amnarabbani@gmail.com)

31 11 Zahra A. Padhani - [zahra.feroz@aku.edu](mailto:zahra.feroz@aku.edu)

32 12 Faareha A Siddiqui – [fsiddiqui@khi.iba.edu.pk](mailto:fsiddiqui@khi.iba.edu.pk)

33 13 Jai K Das - [jai.das@aku.edu](mailto:jai.das@aku.edu)

34 14 Zulfiqar A Bhutta - [zulfiqar.bhutta@sickkids.ca](mailto:zulfiqar.bhutta@sickkids.ca)  
35  
36  
37  
38  
39  
40  
41  
42  
43  
44  
45  
46  
47  
48  
49  
50  
51  
52  
53  
54  
55  
56  
57  
58  
59  
60

17 **Corresponding Author**

18 Zulfiqar A Bhutta

19 Centre for Global Child Health, The Hospital for Sick Children

20 686 Bay Street, Toronto, ON M5G 0A4, Canada

21 Tel: +1 416 813 7654x328532

22 Email: [zulfiqar.bhutta@sickkids.ca](mailto:zulfiqar.bhutta@sickkids.ca)  
23

## 24 **ABSTRACT**

### 25 **Background**

26 Breastfeeding in conflict settings is known to be the safest way to protect infant and young children  
27 from malnourishment and increased risk of infections. This systematic review assesses the  
28 evidence on infant and young child feeding (IYCF) practices in conflict settings.

### 29 **Methodology**

30 We conducted a search in PubMed and CENTRAL and also searched for grey literature from the  
31 year 1980 to August, 2019. We included studies conducted in settings inflicted with armed  
32 conflict; which comprised of settings undergoing conflict, as well as, those within five years of its  
33 cessation. Studies were included if they discussed IYCF practices, barriers, programs and  
34 guidelines to promote and improve IYCF practices. Two review authors independently evaluated  
35 and screened studies for eligibility and extracted data; followed by a descriptive and thematic  
36 analysis.

### 37 **Results**

38 We included 56 studies in our review including 11 published articles and 45 reports from grey  
39 literature and broadly classified into four pre-determined sections: Epidemiology (n=24),  
40 barriers/enablers (n=18), programs/interventions (n=15) and implementation guidelines (n=30).  
41 Epidemiological evidence shows that IYCF practices were generally poor in conflict settings with  
42 median prevalence of exclusive breastfeeding at 25%, continued breastfeeding at 29%, bottle-  
43 feeding at 58.3%, introduction to solid, semi-solid or soft foods at 71.1% and minimum dietary  
44 diversity at 60.3%.

45 IYCF practices were affected by displacement, stress, maternal malnutrition and mental health,  
46 family casualties and free distribution of BMS. To improve IYCF, several interventions were  
47 implemented; including, training of health workers, educating mothers, community networking  
48 and mobilization, lactation-support service, baby friendly hospital initiative (BFHI), mother-baby  
49 friendly spaces and support groups.

### 50 **Conclusion**

51 The evidence suggests that IYCF practices are generally poor in conflict inflicted settings.  
52 However, there is potential for improvement by designing effective interventions, responsibly  
53 disseminating, monitoring and implementing IYCF guidelines as prescribed by WHO  
54 development partners, government and non-government organizations with dedicated funds and  
55 investing in capacity development.

### 56 **Key Words**

57 Breastfeeding, IYCF, Conflict, epidemiology, Barriers, programs, Guidelines

58

1  
2  
3 59 **Word Count:** 5940 words  
4

5 60 **STRENGTHS AND LIMITATIONS OF THIS STUDY**  
6

- 7 61 1. To our knowledge, this is the first systematic review of infant and young child feeding  
8 62 (IYCF) practices in conflict settings that looks at the evidence on the current practices of  
9 63 breastfeeding and complementary feeding, and assesses specific barriers to adapting  
10 64 optimal IYCF practices. This review also explores the evidence on effective strategies to  
11 65 improve IYCF practices, as well as evidence from implementation guidelines, which  
12 66 suggest the way IYCF should be approached in conflict contexts.  
13 67 2. The review highlights the sub-optimal IYCF practices in children affected by conflict.  
14 68 3. The review highlights the evidence derived from strategies/interventions implemented in  
15 69 conflict areas to improve IYCF practices, albeit weak, provides important insights for  
16 70 future approaches to improve IYCF practices.  
17 71 4. The review is limited by the scarcity of evidence as many programs in conflict contexts  
18 72 are not reported. And even within published reports, very few studies have clearly  
19 73 specified the scale of the intervention, year of conflict, year of 'baseline' data or  
20 74 performed a formal evaluation of the program and its impact on IYCF outcomes.  
21 75

## 76 INTRODUCTION

77 Optimal infant and young child feeding practices (IYCF) play a critical role in determining the  
78 nutritional status, health, growth and development of children, along with improving the health of  
79 mothers<sup>(1-4)</sup>. The current guidelines suggest breastfeeding should to be initiated within the first  
80 hour of birth and infants be exclusively breastfed for the first six-months of life, i.e. receive only  
81 breast milk, with the exception of oral rehydration syrups solutions and drops/ of vitamins,  
82 minerals and medicines<sup>(1, 5, 6)</sup>. Exclusive breastfeeding (EBF) offers the required nourishments for  
83 normal growth and development till six months of age<sup>(2)</sup>; thereafter safe, timely and nutritionally  
84 adequate complementary foods should be added to the diet of infants, along with continued  
85 breastfeeding up to two years of age<sup>(1, 5, 6)</sup>.

86 Children who have been breastfed for longer periods of time tend to exhibit lower odds of  
87 infectious morbidity and mortality<sup>(7)</sup>, as infants who are not breastfed have six-fold greater risk of  
88 infections related in the first two-months of life when compared to infants that have been  
89 adequately breastfed<sup>(8)</sup>. The current evidence suggests that high-income countries (HICs) practice  
90 shorter duration of breastfeeding (<20%) compared to low and middle- income countries  
91 (LMICs)<sup>(7)</sup>. However, even within LMICs, approximately only 37% of infants younger than six-  
92 months are exclusively breastfed<sup>(7)</sup>. Just scaling up and promoting breastfeeding to a universal  
93 level could possibly prevent 823,000 annual deaths in children under the age of five<sup>(7)</sup> and 13.8%  
94 of these under two years of age<sup>(7)</sup>. After six months of age, energy–and–nutrient dense foods that  
95 can be easily eaten and digested should be added to infants' diet in order meet their dietary  
96 demands<sup>(9)</sup>. Both breastfeeding and appropriate complementary feeding are pivotal for child  
97 growth and the prevention of disease and malnutrition<sup>(1)</sup>. Breastfeeding coupled with  
98 complementary feeding has the potential to reduce mortality among children under the age of five  
99 by 19%<sup>(5)</sup>.

100 During times of armed conflict, vulnerable groups including children bear the greatest negative  
101 consequences. The onset of conflict increases death rates by up to 24 times, with adverse effects  
102 especially for children under the age of five years<sup>(10)</sup>. Newborns are specifically at a higher risk  
103 of dying if they are poor, exposed to unsafe environments, or if they are within a conflict setting  
104<sup>(8)</sup>. Armed conflict significantly impacts breastfeeding practices with lower rates of breastfeeding  
105 observed in war-torn areas<sup>(11)</sup>. Before Lebanon's conflict in 2006, approximately 27% of mothers  
106 exclusively breastfed for the first four-months of life and after the conflict escalated, the  
107 breastfeeding practices were severely affected with most mothers discontinuing breastfeeding  
108 altogether or initiating mixed feeding and/or reduced breastfeeding<sup>(12)</sup>. Similarly, in these war-  
109 torn areas, complementary feeding may also become severely eroded and disrupted<sup>(1)</sup>. This could  
110 be attributed to safety, access to sufficient quantity and quality of complementary foods, and also  
111 appropriate knowledge of complementary feeding<sup>(1)</sup>. Often, misconceptions associated with the  
112 introduction of solid food results in mothers or caregivers, results in either initiating solid food  
113 early or waiting more than required<sup>(13)</sup>. Suboptimal complementary food intake can result in  
114 deterioration of health status of infants and young children, increasing the risk of morbidity and  
115 mortality<sup>(1)</sup>.

116 In conflict settings; breastfeeding and appropriate complementary feeding is of crucial importance  
117 because it is regarded as the safest way to protect infants and young children from infections and  
118 malnourishment<sup>(14)</sup>. This can be corroborated by the fact that during emergency situations;  
119 mortality rates of artificially-fed infants are greatly elevated in comparison to breastfed babies<sup>(8)</sup>,

1  
2  
3 120 as the risk mortality due to diarrhea and other infectious diseases are 20 times higher than infants  
4 121 who have been exclusively breastfed<sup>(12)</sup>. This is due to prevalent unhygienic conditions coupled  
5 122 with lack of safe water and facilities to sterilize feeding bottles and prepare formula safely. Support  
6 123 for optimal breastfeeding, re-lactation, and timely introduction of complementary foods should be  
7 124 the first choice of intervention during conflict situations to mitigate feeding problems for infants  
8 125 and young children<sup>(9)</sup> and should not be undermined by inappropriate distribution of Breast Milk  
9 126 Substitutes (BMS)<sup>(2, 9, 10)</sup>. There is currently no existing comprehensive review for IYCF in  
10 127 conflict settings. The objective of this systematic review is to assess the evidence on IYCF  
11 128 practices, factors associated with IYCF, evidence on the interventions undertaken and guidelines  
12 129 to improve IYCF practices in children under two years of age living in conflict settings.  
13  
14

15 130

## 16 131 **CONCEPTUAL FRAMEWORK**

17  
18  
19 132 During armed conflicts, IYCF practices are disrupted due to displacement, casualties, lack of  
20 133 resources, stress, and malnutrition, as well as due to unregulated BMS donations by agencies. We  
21 134 developed a conceptual framework to guide this review and highlighting the IYCF practices and  
22 135 factors responsible for improving IYCF practices in an armed conflict and post-conflict settings  
23 136 (Figure 1). It also focuses on the evidence of current IYCF practices, factors associated with  
24 137 improving IYCF and the evidence from interventions and programs implemented in these settings.  
25 138 We also explored existing implementation guidelines and program recommendations for  
26 139 improving IYCF practices from different agencies working in such settings.  
27  
28

29 140

## 30 141 **METHODOLOGY**

31  
32 142 We conducted a systematic review for available published and grey literature, assessing four  
33 143 domains including: Epidemiology (coverage of key IYCF and malnutrition indicators),  
34 144 enablers/barriers (for recommended IYCF practices), interventions/programs (effectiveness in  
35 145 improving IYCF practices) and implementation guidelines to improve IYCF practices in conflict  
36 146 settings.  
37  
38

### 39 147 **Eligibility Criteria**

40  
41 148 We included studies assessing the impact of conflict on IYCF practices and enablers/barriers,  
42 149 interventions/programs and guidelines to promote or facilitate IYCF in conflict settings. We  
43 150 included studies conducted in an armed conflict setting, defined as ‘a political conflict in which  
44 151 armed combat involves the armed forces of at least one state (or one or more armed factions  
45 152 seeking to gain control of all or part of the state) and in which people have been killed by the  
46 153 fighting during the course of the conflict’<sup>(15)</sup>. We included studies conducted during conflict and  
47 154 within five years of its cessation. Included studies comprised of primary research articles, reports  
48 155 and grey literature and policy and guidelines. We included all studies conducted in conflict settings  
49 156 of low, low-middle and upper-middle income countries classified by World Bank <sup>(16)</sup>, during the  
50 157 period of 1980 to 2018. Additionally, studies conducted in refugee camps of HIC were also  
51 158 included for analysis.  
52  
53  
54  
55  
56  
57  
58  
59



159 We excluded studies conducted in HICs apart from refugee camps. Clinical studies (exclusively  
 160 looking at microbiological/laboratory outcomes/screening or diagnostic test evaluations or  
 161 surgical techniques/outcomes) and mathematical modeling or economic study (with no empirical  
 162 data/information), systematic and literature reviews were excluded from the study. We also  
 163 excluded studies conducted in humanitarian emergencies apart from armed conflict.

## 164 **Data Management**

165 We searched PubMed and CENTRAL using our search strategy constructed by using Medical  
 166 Subject Headings (MeSH) and key words (Box 1). The bibliographies of relevant systematic  
 167 reviews and included studies were searched to identify the missing records in the database search.  
 168 We only included articles in English language. Additionally, a grey literature search was conducted  
 169 on Google and websites and publications of relevant agencies such as WHO, UNICEF, UNHCR,  
 170 International Baby Food Action Network, Emergency Nutrition Network, Baby Milk Action, Save  
 171 the Children, Action Against Hunger and Wellstart International. We also searched for additional  
 172 data by entering titles of all included studies on Google Scholar and reviewing the first 10 pages  
 173 to include any relevant missing studies.

### **Box 1: Search Strategy**

("Disasters"[Mesh] OR "Disaster Victims"[Mesh] OR "Natural Disasters"[Mesh] OR mass  
 disaster OR catastrophe\* OR crisis OR crises OR war OR "afghan campaign" OR "Armed  
 Conflicts"[Mesh] OR conflict OR conflicts OR war OR avalanche\* OR cyclone\* OR  
 drought\* OR earthquake\* OR flood\* OR hurricane\* OR landslid\* OR land slide OR land  
 slides OR mudslid\* OR mudslides OR mud slide OR mud slides OR storm\* OR tornado\*  
 OR tsunami\* OR typhoon\* OR volcano\*) AND ("Refugees"[Mesh] OR refugee OR asylum  
 seeker\* OR returnees OR "IDP" OR "IDPs" OR internally displaced person\* OR mother\*  
 OR "lactating" OR "lactating mother" OR "lactating mothers") AND (Breastfeed\* OR  
 "breast feeding" OR "breastfed" OR "exclusive breastfeeding" OR "human milk"  
 OR "lactation" OR infant feed\* OR complementary feed\* OR "IYCF" OR "Infant and  
 Young Child Feeding" OR "early initiation" OR "colostrum" OR "breastfeeding practices"  
 OR "breastfeeding promotion" OR "breastfeeding facilitation" OR barriers OR "breast milk  
 collection" OR "breast milk collections" OR "breast milk expression" OR "breast milk  
 expressions" OR "breast pumping" OR "breast pumpings" OR "breastmilk collection" OR  
 "breastmilk collections" OR "breastmilk expression" OR "breastmilk expressions" OR "milk  
 bank" OR "feeding bank")

174 After running the electronic search, all records were imported to EndNote software<sup>(17)</sup> and were  
 175 de-duplicated prior to title and abstract screening. Two reviewers independently screened titles  
 176 and abstracts, followed by full text screening. All the discrepancies were resolved after discussion  
 177 at each stage and a third reviewer was contacted incase two reviewers were unable to reach a  
 178 consensus. Data was extracted independently by two reviewers from the included studies in an  
 179 excel sheet after the full text screening. We calculated the median of all IYCF and malnutrition  
 180 indicators from the studies identified and conducted a descriptive and thematic analysis of included

181 studies to explore and synthesize information on the contextual factors and intervention and  
182 recommended implementation strategies.

183 We obtained ethical approval of this study from the Ethical Review Committee of Aga Khan  
184 University, Karachi and the National Bioethics Committee, Pakistan. The funding for this review  
185 was received from the Family Larsson-Rosenquist Foundation.

## 186 **Patient and Public Involvement**

187 This research was done without patient involvement. Patients were not invited to contribute to  
188 the writing or editing of this document for readability or accuracy.

189

## 190 **RESULTS**

191 We identified a total of 56 studies (Figure 2) which were broadly classified into the pre-determined  
192 four sections; epidemiology, enablers/barriers, programs/interventions and implementation  
193 guidelines.

194

### 195 **Epidemiology**

196 Twenty-four studies reported on the prevalence of breastfeeding and the burden of disease in  
197 different conflict-affected regions<sup>(10, 13, 14, 18-38)</sup>. Eighteen were reports<sup>(10, 13, 14, 18-24, 26, 28-30, 32, 33, 37,</sup>  
198 <sup>38)</sup>, five were cross sectional studies<sup>(25, 27, 34-36)</sup>, and one was a cohort study<sup>(31)</sup>. Seven studies were  
199 conducted in Middle East<sup>(13, 14, 19, 21-23, 26)</sup>, six in Europe<sup>(18, 19, 27, 30, 33, 35)</sup>, five in Africa<sup>(18, 20, 25, 31,</sup>  
200 <sup>32)</sup>, four in Asia<sup>(24, 28, 29, 38)</sup> and two reported on prevalence in more than one region which included  
201 Africa<sup>(10)</sup>, Asia<sup>(10, 37)</sup> and Middle East<sup>(37)</sup>. The included studies collected data through various  
202 sources and methods; five studies included data from national assessments done by the WHO and  
203 other developmental partners<sup>(10, 19, 21, 22, 37)</sup>, five conducted cross sectional household surveys<sup>(26,</sup>  
204 <sup>27, 33, 34, 36)</sup>, four collected data from multiple indicator cluster survey<sup>(13, 14, 29, 35)</sup>, four conducted  
205 SMART surveys<sup>(18, 20, 28, 38)</sup>, one distributed questionnaires<sup>(25)</sup>, one collected data from national  
206 surveillance system registry<sup>(31)</sup>, one through Disease Early Warning System surveillance network  
207<sup>(24)</sup> and two did not specify<sup>(23, 32)</sup>.

208 Twenty studies reported on IYCF according to the WHO IYCF indicators which are summarized  
209 in Table 1<sup>(13, 18-21, 23, 25-38)</sup>. These studies analyzed IYCF indicators divided into WHO eight core  
210 indicators (early initiation of breastfeeding, exclusive breastfeeding under six months, continued  
211 breastfeeding at one year, introduction of solid, semi-solid or soft foods, minimum dietary  
212 diversity, minimum meal frequency, minimum acceptable diet and consumption of iron-rich or  
213 iron-fortified foods) and seven optional indicators (children ever breastfed, continued  
214 breastfeeding at two years, age-appropriate breastfeeding, predominant breastfeeding under six  
215 months, duration of breastfeeding, bottle feeding and milk feeding frequency of non-breastfed  
216 children)<sup>(39)</sup>. Using the data extracted from included studies, the median prevalence of early  
217 initiation of breastfeeding in conflict-affected areas was 51% (range: 31.3% to 85%), EBF was  
218 25% (range: 5.5% to 77.1%), proportion of children with appropriate introduction of solid, semi-  
219 solid or soft foods was 71.1% (range: 40.7% to 98.6%), proportion of children with minimum  
220 dietary diversity was 60.3% (range: 9.2% to 79.4%), children ever breast-fed was 92% (range:  
221 62.8% to 98.4%), continued breastfeeding at two years was 29% (range: 9% to 66%), age-

222 appropriate breastfeeding was 43.2% (range: 19.5% to 77.8%), predominant breastfeeding was  
223 31.3% (range: 7.1% to 77.3%) and bottle feeding was 58.3% (range: 31.8% to 71.4%).

224 Two studies<sup>(25, 27)</sup> reported on association of breastfeeding with malnutrition in displaced  
225 Bosnian<sup>(27)</sup> and Saharawi children<sup>(25)</sup>. Infants were more likely to be malnourished who were never  
226 breastfed (Odds Ratio (OR): 1.78, 95% Confidence Interval (CI): 1.26, 2.52) or who were not  
227 breastfed for at least four months (OR: 1.45, 95% CI: 1.02, 2.07) than those who were ever  
228 breastfed or were breastfed for four months. Malnutrition persisted among infants who were not  
229 exclusively breastfed and infants who were breastfed for less than five to six months were more  
230 likely to be malnourished (OR:1.98, 95% CI: 1.01, 7.35) than those who were breastfed for more  
231 than six months<sup>(27)</sup>. After adjusting for diseases, mother's body mass index and child's age;  
232 prevalence of underweight and wasting was low among children who were predominantly or  
233 exclusively breastfed (Mean Difference (MD): 0.62, 95%CI: 0.10, 1.13 and 0.41, 95% CI: -0.08,  
234 0.91 respectively)<sup>(25)</sup>.

235

236

**Table 1: IYCF practices in conflict settings**

|                        | Indicators                                                                                      | Target Population: Country                                                                                                                                                                                               | Setting                                                                                                                                                                | Estimates<br>Median (range)   | Sample size<br>Median (range) | Scale                                                                                             |
|------------------------|-------------------------------------------------------------------------------------------------|--------------------------------------------------------------------------------------------------------------------------------------------------------------------------------------------------------------------------|------------------------------------------------------------------------------------------------------------------------------------------------------------------------|-------------------------------|-------------------------------|---------------------------------------------------------------------------------------------------|
| <b>Core Indicators</b> | Early Initiation of Breastfeeding (n=10) <sup>(18, 20, 21, 25, 26, 28, 32, 35, 36, 38)</sup>    | - IDPs: South Sudan, Ukraine<br>- Refugees: Algeria, Jordan, Kenya, Lebanon, Pakistan<br>- Not Specified: Bosnia-Herzegovina, CAR, Yemen                                                                                 | - Camp: Algeria, Jordan, Kenya, Lebanon<br>- Community: Pakistan, South Sudan, Ukraine, Yemen                                                                          | 51% (range:31.3% to 85%)      | 357 (range:111-1368)          | - Camps: Algeria, Jordan, Kenya<br>- Village: Pakistan<br>- District: Yemen<br>- National: CAR    |
|                        | Exclusive breastfeeding under 6 months (n=16) <sup>(10, 13, 20, 21, 25, 26, 28-30, 32-38)</sup> | - IDPs: Bosnia-Herzegovina, Ukraine, Sierra Leone, South Sudan<br>- Refugees: Algeria, Greece, Jordan, Kenya, Lebanon, Pakistan<br>- Not Specified: Afghanistan, Bosnia-Herzegovina, Iraq, Kosovo, Lebanon, Syria, Yemen | - Camp: Algeria, Kenya, Lebanon<br>- Community: Bosnia-Herzegovina, Iraq, Kosovo, Pakistan, South Sudan, Ukraine, Yemen<br>- Community and Healthcare Facility: Jordan | 25% (range:5.5% to 77.1%)     | 432 (range:58-250,000)        | - Camps: Algeria, Jordan, Kenya<br>- Village: Pakistan<br>- District: Yemen<br>- National: Kosovo |
|                        | Continued Breastfeeding at one years (n=7) <sup>(21, 28, 32, 33, 35, 36, 38)</sup>              | - IDPs: Ukraine<br>- Refugees: Greece, Kenya, Lebanon, Pakistan<br>- Not Specified: Bosnia-Herzegovina, Yemen                                                                                                            | - Camp: Kenya, Lebanon<br>- Community: Pakistan, Ukraine, Yemen                                                                                                        | 57.20% (range:8.5% to 78.2%)  | 326 (range:38-1368)           | - Camp: Kenya<br>- Village: Pakistan<br>- District: Yemen                                         |
|                        | Introduction of Solid, Semi Solid or Soft Food (n=6) <sup>(25, 32, 33, 35, 36, 38)</sup>        | - IDPs: Ukraine<br>- Refugees: Algeria, Greece, Kenya, Pakistan<br>- Not Specified: Bosnia-Herzegovina,                                                                                                                  | - Camp: Algeria, Kenya<br>- Community: Pakistan, Ukraine                                                                                                               | 71.05% (range:40.7% to 98.6%) | 477 (range:111-1368)          | - Camps: Algeria, Kenya<br>- Village: Pakistan                                                    |
|                        | Minimum Dietary Diversity (n=5) <sup>(18, 20, 28, 33, 38)</sup>                                 | - IDPs: South Sudan<br>- Refugees: Greece, Pakistan<br>- Not Specified: CAR, Yemen                                                                                                                                       | - Community: Pakistan, South Sudan<br>Yemen                                                                                                                            | 60.25% (range:9.2% to 79.4%)  | 309 (range:148-1055)          | - Village: Pakistan<br>- District: Yemen<br>- National: CAR                                       |
|                        | Minimum Meal Frequency (n=6) <sup>(18, 20, 28, 33, 36, 38)</sup>                                | - IDPs: South Sudan, Ukraine<br>- Refugees: Greece, Pakistan<br>- Not Specified: CAR, Yemen                                                                                                                              | - Community: Pakistan, South Sudan, Ukraine, Yemen                                                                                                                     | 58% (range:58% to 97.6%)      | 432 (range:148-1055)          | - Village: Pakistan<br>- District: Yemen<br>- National: CAR                                       |
|                        | Minimum Acceptable Diet (n=5) <sup>(18, 20, 28, 33, 38)</sup>                                   | - IDPs: South Sudan<br>- Refugees: Greece, Pakistan<br>- Not Specified: CAR, Yemen                                                                                                                                       | - Community: Pakistan, South Sudan, Yemen                                                                                                                              | 24.95% (range:30.5% to 33%)   | 309 (range:148-1055)          | - Village: Pakistan<br>- District: Yemen<br>- National: CAR                                       |

|                            |                                                                                |                                                                                                                                 |                                                                                      |                               |                              |                                                                            |
|----------------------------|--------------------------------------------------------------------------------|---------------------------------------------------------------------------------------------------------------------------------|--------------------------------------------------------------------------------------|-------------------------------|------------------------------|----------------------------------------------------------------------------|
|                            |                                                                                |                                                                                                                                 |                                                                                      |                               |                              |                                                                            |
|                            | Consumption of Iron Rich and Iron Fortified Food (n=2) <sup>(26, 36)</sup>     | - IDPs: Ukraine<br>- Refugees: Jordan                                                                                           | - Camp: Jordan<br>- Community: Ukraine                                               | 51.61% (range:29% to 84.7%)   | 379 (range:281-477)          | - Camp: Jordan                                                             |
| <b>Optional Indicators</b> | Children ever breastfed (n=5) <sup>(27, 30, 33, 36, 38)</sup>                  | - All (refugees, displaced and not displaced): Bosnia-Herzegovina<br>- IDPs: Ukraine<br>- Refugees: Greece, Macedonia, Pakistan | - Camp: Macedonia<br>- Community: Bosnia-Herzegovina, Pakistan, Ukraine              | 92% (62.8% to 98.4%)          | 766 (range:148-1123)         | - Camp: Macedonia<br>- Village: Pakistan<br>- National: Bosnia-Herzegovina |
|                            | Continued Breastfeeding at two years (n=6) <sup>(21, 29, 33, 35, 36, 38)</sup> | - IDPs: Ukraine<br>- Refugees: Lebanon, Pakistan, Greece<br>- Not Specified: Bosnia-Herzegovina, Iraq                           | - Camp: Lebanon<br>- Community: Iraq, Pakistan, Ukraine                              | 29% (range:9% to 66%)         | 477 (range:148-55194)        | - Village: Pakistan<br>- National: Iraq                                    |
|                            | Age appropriate breastfeeding (n=3) <sup>(33, 35, 38)</sup>                    | - Refugees: Greece, Pakistan<br>- Not Specified: Bosnia-Herzegovina                                                             | - Community: Pakistan                                                                | 43.20% (range:19.5% to 77.8%) | 602 (range:148-1055)         | - Village: Pakistan                                                        |
|                            | Predominant breastfeeding under 6 months (n=5) <sup>(25, 30, 33, 35, 38)</sup> | - Refugees: Algeria, Greece, Pakistan<br>- Not Specified: Bosnia-Herzegovina, Kosovo                                            | - Camp: Algeria<br>- Community: Kosovo, Pakistan                                     | 31.30% (range:7.1% to 77.30%) | 176 (range:111-1055)         | - Village: Pakistan                                                        |
|                            | Duration of breastfeeding (n=2) <sup>(27, 31)</sup>                            | - All (refugees, displaced and not displaced): Bosnia-Herzegovina<br>- IDPs: Guinea-Bissau                                      | - Community: Bosnia-Herzegovina, Guinea-Bissau                                       | 22.7 months                   | 2149 (range:1741-2556)       | - City: Guinea-Bissau<br>- National: Bosnia-Herzegovina                    |
|                            | Bottle feeding (n=3) <sup>(21, 36, 38)</sup>                                   | - IDPs: Ukraine<br>- Refugees: Lebanon, Pakistan                                                                                | - Camp: Lebanon<br>- Community: Pakistan, Ukraine                                    | 58.30% (range:31.8% to 71.4%) | 477 (range:174-1055)         | - Village: Pakistan                                                        |
|                            | Milk feeding frequency of non-breastfed children (n=1) <sup>(33)</sup>         | - Refugees: Greece                                                                                                              | - Not Stated                                                                         | 33.90%                        | 148                          | - Not Stated                                                               |
| <b>Malnutrition</b>        | Underweight (n=4) <sup>(10, 25, 28, 38)</sup>                                  | - IDPs: Afghanistan, Sierra Leone<br>- Refugees: Algeria, Pakistan<br>- Not Specified: East Timor, Yemen                        | - Camp: Algeria<br>- Community: Pakistan, Yemen                                      | 33.10% (range:12.01% to 48%)  | 1055 (range:111-250,000)     | - Camp: Algeria<br>- Village: Pakistan<br>- District: Yemen                |
|                            | Acute Malnutrition (n=3) <sup>(10, 24, 36)</sup>                               | - All ((IDPs, refugees and residents): Southern Somalia<br>- IDPs: Ukraine, Pakistan                                            | - Camp: Southern Somalia, Ukraine<br>- Camps, hospitals and mobile clinics: Pakistan | 30.10% (range:0.5% to 81%)    | 80,000 (range:477-3,000,000) | - Camps and Healthcare facilities: Pakistan                                |

|                      |                                                                                       |                                                                                                                                                                   |                                                                                                           |                             |                                 |                                                                                            |
|----------------------|---------------------------------------------------------------------------------------|-------------------------------------------------------------------------------------------------------------------------------------------------------------------|-----------------------------------------------------------------------------------------------------------|-----------------------------|---------------------------------|--------------------------------------------------------------------------------------------|
|                      | GAM (n=7) <sup>(14, 18, 20, 23, 28, 32, 38)</sup>                                     | - IDPs: South Sudan<br>- Refugees: Jordan, Kenya, Pakistan<br>- Not Specified: CAR, Yemen                                                                         | - Camp: Jordan, Kenya<br>- Community: Pakistan, South Sudan, Yemen                                        | 9.95% (range:2.6% to 25.1%) | 498 (range:208-1368)            | - Camp: Jordan, Kenya<br>- Village: Pakistan, Yemen<br>- District: Yemen                   |
|                      | MAM (n=9) <sup>(10, 19, 20, 25, 28, 34, 36, 38, 40)</sup><br>(Z- score <-2 to <-3 SD) | - IDPs: Afghanistan, Bosnia-Herzegovina, Sierra Leone, South Sudan, Sudan, Ukraine<br>- Refugees: Algeria, Jordan, Pakistan<br>- Not Specified: East Timor, Yemen | - Camp: Algeria, Ukraine<br>- Community: Bosnia- Herzegovina, Jordan, Pakistan, South Sudan, Sudan, Yemen | 4.0% (range:0.27 to 25%)    | 563 (range:111-250,000)         | - Camp: Algeria<br>- Village: Pakistan<br>- District: Yemen<br>- Governorates: Jordan      |
|                      | SAM (n=8) <sup>(18-20, 23, 28, 32, 38, 40)</sup><br>(Z- score <-3 SD)                 | - IDPs: South Sudan, Sudan<br>- Refugees: Jordan, Kenya, Pakistan<br>- Not Specified: CAR, Yemen                                                                  | - Camp: Kenya<br>- Community: Jordan, Pakistan, South Sudan, Sudan, Yemen                                 | 1.50% (range:0.15% to 5.3%) | 809 (range:208-46,383)          | - Camp: Kenya<br>- Village: Pakistan, Yemen<br>- District: Yemen<br>- Governorates: Jordan |
| Chronic Malnutrition | Stunting (n=7) <sup>(10, 18, 20, 23, 25, 28, 38)</sup>                                | - IDPs: Afghanistan, Sierra Leone, South Sudan<br>- Refugees: Algeria, Pakistan<br>- Not Specified: East Timor, CAR, Yemen                                        | - Camp: Algeria<br>- Community: Pakistan, South Sudan, Yemen                                              | 38.60% (range:13.6% to 53%) | 432 (range:111-1055)            | - Camp: Algeria<br>- Village: Pakistan, Yemen<br>- District: Yemen                         |
|                      | Overweight (n=1) <sup>(38)</sup>                                                      | - Refugees: Pakistan                                                                                                                                              | - Community                                                                                               | 18.1%                       | 1055                            | - Village                                                                                  |
|                      | Anemia (n=1) <sup>(38)</sup>                                                          | - Refugees: Pakistan                                                                                                                                              | - Community                                                                                               | 23.2%                       | 1055                            | - Village                                                                                  |
| Other Indicators     | Diarrhea Prevalence (n=3) <sup>(10, 24, 28)</sup>                                     | - IDPs: Guatemala, Pakistan<br>- Not Specified: Yemen                                                                                                             | - Camps, hospital and mobile clinics: Pakistan<br>- Community: Yemen                                      | 30% (range:28.9% - 73.8%)   | 303 (range:42-563)              | - Healthcare facilities: Pakistan<br>- District: Yemen                                     |
|                      | Mortality due to Diarrhea (n=3) <sup>(10, 34, 38)</sup>                               | - IDPs: Bosnia-Herzegovina, Somalia<br>- Refugees: Iraq, Nepal, Pakistan, Uganda, Zaire<br>- Residents: Eastern DRC                                               | - Camps: Southern Somalia<br>- Community: Bosnia-Herzegovina, Pakistan                                    | 39% (range:22.3% to 87%)    | 100, 000 (range:1055-3,000,000) | - Village: Pakistan                                                                        |

## 238 Enablers/ Barriers

239 Eighteen studies reported on enablers/barriers to IYCF practices in conflict settings (Figure 3)<sup>(13,</sup>  
240 14, 19-22, 25, 27, 29, 33-37, 41-44). Of these, 12 were reports<sup>(13, 14, 19-22, 29, 33, 37, 41, 43, 44)</sup> and six were cross  
241 sectional studies<sup>(25, 27, 34-36, 42)</sup>. Seven studies were conducted in Europe<sup>(27, 33-37, 44)</sup>, five in Middle  
242 East<sup>(13, 14, 19, 21, 22)</sup>, three in Africa<sup>(20, 25, 42)</sup>, one in Asia<sup>(29)</sup>, one study was conducted in both Asia  
243 and Europe<sup>(41)</sup>, and one failed to report<sup>42</sup>. Nine studies reported on refugees<sup>(13, 14, 19, 21, 25, 32, 37, 41,</sup>  
244 44), four on internally displaced persons (IDPs)<sup>(20, 22, 34, 36)</sup>, three on non-displaced residents<sup>(27, 29,</sup>  
245 42) and two failed to report on the target population<sup>(35, 43)</sup>. Nine studies were conducted in camps  
246 (13, 14, 19, 21, 25, 32, 37, 41, 44), seven in community<sup>(20, 22, 27, 29, 34, 36, 42)</sup> and two did not report<sup>(35, 43)</sup>.

### 247 Conflict-related violence

248 Breastfeeding declined significantly in regions with high levels of conflict-related violence relative  
249 to areas which were considered the 'safest areas' in Iraq<sup>(29)</sup>. A mother residing in dangerous areas  
250 of Iraq was 17.4% more likely to stop breastfeeding compared to mothers living in the safe areas  
251 <sup>(29)</sup>. In Bosnia-Herzegovina, illness of mother/baby disrupted breastfeeding and a few mothers  
252 made a personal decision not to breastfeed<sup>(35)</sup>. Other reasons that negatively affected breastfeeding  
253 practices in conflict affected areas were unavailability of trained healthcare professionals, and  
254 disruption in knowledge created by violent conflict<sup>(19, 29)</sup>.

### 255 Misconceptions

256 Ten studies reported the common misconception amongst refugees, media, and humanitarian  
257 workers that mothers produce poor quality, insufficient milk due to malnourishment and stress  
258 induced as an impact of war<sup>(19-22, 29, 33, 34, 37, 41, 43)</sup>. These misconceptions led to mothers feeding  
259 undiluted animal milk to infants younger than four months<sup>(20)</sup>. In Bosnia-Herzegovina and Jordan,  
260 health professionals discouraged mothers from breastfeeding due to significant maternal weight  
261 loss during conflict<sup>(19, 34)</sup>. Breastfeeding practices of mothers were affected by mental trauma from  
262 fighting and due to war-related casualties in male members of the family<sup>(20, 21, 27, 29, 41)</sup>. In Bosnia-  
263 Herzegovina, infants were less likely to be breastfed for more than 4 months if they resided closer  
264 to the area of conflict and if the household was not receiving remittances from abroad<sup>(27)</sup>.

### 265 Initiation of breastfeeding

266 Studies conducted in Algeria, Jordan, and Northern Uganda mentioned factors leading to delayed  
267 initiation of breastfeeding by refugee mothers as home delivery, C-section, breast pain, discarding  
268 initial milk, illiteracy, lack of support from medical staff, previous experience, mother being ill  
269 and being the sole person responsible for decision of initiating breastfeeding<sup>(25, 26, 42)</sup>. Mothers  
270 used pre-lacteal feeds before initiating breastfeeding, as colostrum was believed to be of low  
271 nutritional value and was considered 'dirty' and harmful<sup>(25, 42)</sup>. The report from Iraq and Greece  
272 mentioned that many mothers assumed that their milk was 'dirty' if a previous infant died while  
273 breastfeeding, resulting in them refraining from breastfeeding the next baby<sup>(41)</sup>.

### 274 Introduction of complementary foods



275 Early introduction of complementary food and infant formula also led to suboptimal breastfeeding  
276 practices<sup>(13, 21, 33, 35, 43)</sup>. They were introduced as early as 1-3 months because of the misconception  
277 that breastmilk was not sufficient for meeting the nutritional requirements of the infants<sup>(21, 35)</sup>.  
278 Seven studies focusing mainly on refugees from conflict affected countries, explored reasons for  
279 mix feeding or fully artificial feeding infants<sup>(13, 19, 21, 33, 35, 41, 43)</sup>. Breastfeeding and complementary  
280 feeding practices were influenced by religious and cultural determinants and frequent migrations  
281<sup>(29, 33)</sup>. Studies from Jordan and Bosnia-Herzegovina mentioned about the role of grandmothers in  
282 influencing breastfeeding and complementary feeding practices and barriers<sup>(19, 35)</sup>. Grandmothers  
283 often pressurized mothers to feed BMS (water and herbs) to infants and asked mothers to follow  
284 their traditional approach. Moreover, there was a cultural belief that formula milk is safer than  
285 breast milk and to introduce complementary feeding early<sup>(19, 41)</sup>.

### 286 Breast Milk Substitutes (BMS)

287 Refugees in Lebanon and Greece considered BMS as necessary food for infants during  
288 emergencies and many mothers pursued mixed feeding because of the physician's prescription of  
289 infant formula<sup>(13, 33, 43)</sup>. The study on Syrian refugees in Lebanon stated that in children above six  
290 months, child refusal of food was due to inadequate knowledge regarding complementary feeding  
291 practices and the quantity of solid food that a young child should receive per day<sup>(21)</sup>. In Azraq  
292 refugee camp in Jordan, poor quality food and lack of iron-rich foods in the market was the reason  
293 for low consumption of iron-rich foods by the infants and young children<sup>(26)</sup>. In Bosnia-  
294 Herzegovina and Lebanon, mothers introduced tea, sugar, water, juice and infant formula in the  
295 feeding practice to spend less time breastfeeding which negatively influenced the rate of EBF<sup>(21,</sup>  
296<sup>35)</sup>. Two studies' mentioned 'lack of milk' as the reason for early weaning by mothers<sup>(33, 35)</sup>, and  
297 many mothers wrongly thought that weaning can't be reversed<sup>(43)</sup>. Another reason for suboptimal  
298 breastfeeding practices, mentioned by four studies from Iraq, Greece, Lebanon and Jordan, was  
299 the heavy marketing of artificial feeding and big push from infant formula companies, which made  
300 mothers believe that it was better<sup>(13, 14, 33, 41)</sup>.

### 301 Programs/ Interventions

302 Breastfeeding in an emergency is known to be the safest way to protect infants and young children  
303 from an increased risk of infection and undernutrition<sup>(14)</sup>. To reduce the burden of disease and  
304 poor IYCF practices; several programs were launched in conflict-affected countries by different  
305 organizations (WHO, international NGOs and local NGOs). The interventions were mostly based  
306 on the WHO guidelines to promote, protect, and support appropriate IYCF practices.

307 We included fifteen studies which reported on promotion of optimal IYCF practices in conflict  
308 settings (Table 2)<sup>(10, 13, 14, 18-24, 32, 35, 40, 41, 44)</sup>. Fourteen were reports<sup>(10, 13, 14, 18-24, 32, 40, 41, 44)</sup> and one  
309 was a cross-sectional study<sup>(35)</sup>. These programs were formulated based on literature review,  
310 document review and extensive discussions of stakeholders during conferences, through semi-  
311 structured interviews (e.g., open group discussions of mothers/ caregivers), and knowledge,  
312 attitude and practices surveys. Six studies were conducted in Middle East<sup>(13, 14, 19, 21-23)</sup>, four in  
313 Africa<sup>(18, 20, 32, 40)</sup>, three in Europe<sup>(10, 35, 44)</sup>, one in Asia<sup>(24)</sup> and one study was conducted at more  
314 than one place i.e. Europe and Asia<sup>(41)</sup>. Eight of these focused on refugees<sup>(10, 13, 14, 19, 21, 32, 41, 44)</sup>,  
315 three involved IDPs<sup>(20, 22, 24)</sup>, one reported on both hosts and IDPs<sup>(40)</sup> and three studies failed to  
316 report on it<sup>(18, 23, 35)</sup>. Six studies were conducted in refugee camps<sup>(10, 13, 21, 32, 41, 44)</sup>, five in

1  
2  
3 317 community<sup>(18, 20, 22, 23, 40)</sup>, three in both camps as well as in clinics<sup>(14, 19, 24)</sup>, and one study failed to  
4 318 report on it<sup>(35)</sup>.

6 319 The specific interventions in these programs included capacity building of healthcare staff,  
7 320 education and awareness activities for mothers, community mobilization, provision of baby  
8 321 friendly spaces, lactation support services, complementary and safe artificial feeding support  
9 322 services, baby friendly hospital initiative (BFHI) and monitoring and control of BMS<sup>(10, 13, 14, 18-24,</sup>  
10 323 <sup>32, 35, 40, 41, 44)</sup>. Five studies focused only on one intervention for promotion of optimal breastfeeding  
11 324 practices <sup>(22-24, 35, 44)</sup>, while rest had a multi-pronged approach <sup>(10, 13, 14, 18-21, 32, 40, 41)</sup>. Most of the  
12 325 studies/programs did not evaluate the programs and its impact on IYCF practices or health and  
13 326 nutrition indicators. A follow-up survey after three months of intervention, assessed breastfeeding  
14 327 practices among Syrian refugees in Jordan, which showed an increase in breastfeeding knowledge  
15 328 from 49.5% in 2013 to 71% in community and 91.2% in health facility in 2014. However, no  
16 329 improvement in breastfeeding practices was observed<sup>(19)</sup>. Similarly, in Greece, formula use in the  
17 330 refugee camps decreased from 60% to 0% within 6 months, through their IYCF program in  
18 331 emergencies <sup>(41)</sup>.

332

**Table 2: Programs/ Interventions to Promote Optimal IYCF Practices**

| Program                                                                                                               | Target Population/<br>Countries                                                                          | Setting                                                                                                                                                          | Health Workforce Involved                                                                                                                                                                             | Program/ Intervention Details                                                                                                                                                                                                                                                                                                                                                 | Outcomes                                                                                                                                                                                                                                                                                                                                                                                                                                                                                                                                                                                                                                                                                                                                                                                                                                                                                                                                                                            |
|-----------------------------------------------------------------------------------------------------------------------|----------------------------------------------------------------------------------------------------------|------------------------------------------------------------------------------------------------------------------------------------------------------------------|-------------------------------------------------------------------------------------------------------------------------------------------------------------------------------------------------------|-------------------------------------------------------------------------------------------------------------------------------------------------------------------------------------------------------------------------------------------------------------------------------------------------------------------------------------------------------------------------------|-------------------------------------------------------------------------------------------------------------------------------------------------------------------------------------------------------------------------------------------------------------------------------------------------------------------------------------------------------------------------------------------------------------------------------------------------------------------------------------------------------------------------------------------------------------------------------------------------------------------------------------------------------------------------------------------------------------------------------------------------------------------------------------------------------------------------------------------------------------------------------------------------------------------------------------------------------------------------------------|
| Capacity Building and Program-Strengthening Projects for Health Workers (n=7) <sup>(13, 14, 19, 22, 32, 40, 41)</sup> | - IDPs: Sudan, Syria<br>- Refugees: Jordan, Kenya, Lebanon<br>- Not Specified: Greece, Iraq              | - Camps: Jordan<br>- Fixed and mobile clinics: Jordan, Lebanon                                                                                                   | - Trained Physician (doctors, nurses)<br>- Paramedic Staff (midwives, TBAs)<br>- Community Workers (facility and community based IYCF counsellors, local reproductive health worker)                  | - Training sessions on IYCF<br>- Malnutrition screening and treatment<br>- Continuous follow up and co-ordination                                                                                                                                                                                                                                                             | <b>Coverage of Training:</b><br>- In Lebanon and Syria: >190 doctors and health workers <sup>27, 29</sup>                                                                                                                                                                                                                                                                                                                                                                                                                                                                                                                                                                                                                                                                                                                                                                                                                                                                           |
| Education and Awareness Activities for Mothers (n=7) <sup>(13, 14, 18, 19, 21, 24, 32)</sup>                          | -IDPs: Pakistan<br>-Refugees: Jordan, Kenya, Lebanon<br>-Not specified: CAR                              | - Camps: Jordan, Kenya, Lebanon, Pakistan<br>- Community: CAR, Lebanon<br>- Fixed and mobile clinics: Jordan, Pakistan<br>- Healthcare facility: Jordan Pakistan | - Trained Physician (lactation specialists)<br>- Community Workers (Nutrition officer, IYCF educator and a community mobiliser)                                                                       | - Counselling sessions on optimal IYCF-E practices<br>- Educational materials and counselling cards distributed<br>- Sensitizations on childcare practices and cooking demonstrations given to PLW<br>- Distribution of hygiene and baby kits (soaps, blankets, baby spoons, and cups for children), and bangles for mothers                                                  | <b>Coverage of IYCF Counselling</b><br>- In Jordan: 30-40 mothers counselled/day <sup>9</sup> ; 4,690 PLWs and 919 mothers counselled in 10 months <sup>17</sup><br>- In Lebanon: 10,000 mothers were counselled in one year <sup>27</sup><br>- In CAR: 758/900 (84.2%) PLW participated <sup>16</sup>                                                                                                                                                                                                                                                                                                                                                                                                                                                                                                                                                                                                                                                                              |
| Community Networking and Mobilization (n=8) <sup>(13, 14, 19, 20, 23, 32, 40, 41)</sup>                               | - IDPs: South Sudan, Sudan<br>- Refugees: Jordan, Kenya, Lebanon<br>- Not Specified: Greece, Iraq, Yemen | - Camps: Jordan, Kenya<br>- Community: Lebanon, South Sudan, Sudan, Yemen                                                                                        | - Community Workers (refugee mothers, community leaders, 'leader mothers' (mothers trained by promotors to teach neighbor women), and 'neighbor women' (chosen by community) as community mobilisers) | - Training of community mobilizers by IYCF counsellors, educators, 'promotors', program supervisors and IYCF coordinators on IYCF and the importance of exclusive breastfeeding, nutrition<br>- Dissemination of messages among mothers through household visits, demonstrations and information sharing within care groups<br>- Screening and referring malnourished mothers | <b>Coverage of Health Workers Training:</b><br>- In South Sudan, 320 'leader mothers' trained IYCF <sup>18</sup><br><b>Coverage of IYCF Counselling</b><br>- In Jordan: 4,977 PLWs and 31,485 caregivers in 10 months <sup>17</sup><br>- In South Sudan: 320 neighborhood groups, reaching 3,832 women <sup>18</sup><br>- In Yemen, 50-60% increase in awareness of mothers/caregivers on nutritious food along with an increase in utilization of local foods for preparing nutritious meals for infants <sup>31</sup><br><b>Mass Screening and SAM/MAM Treatment</b><br>- In Yemen: 90% of children <2 years screened for SAM and MAM, 2,563 children were treated for SAM, reduction in number of cases of SAM and MAM children; zero cases of SAM (MUAC <115mm) in 13/68 model villages by the end of the project <sup>31</sup><br>- In Sudan: 150,617 children screened for malnutrition <sup>43</sup><br>- In Yemen: Reduction in bottle feeding to almost zero <sup>31</sup> |
| Mother Baby Friendly Spaces and Mother to Mother Support                                                              | - IDPs: South Sudan, Sudan                                                                               | - Camps: Albania, Kenya, Lebanon<br>- Caravans: Jordan                                                                                                           | - Trained Physician: Pediatrician, lactation consultant<br>- Community Workers: Relief workers, psychosocial workers, pediatrician,                                                                   | - Construction of Mother-baby friendly spaces, caravans and mother baby center for counselling and 24-hour support                                                                                                                                                                                                                                                            | <b>Coverage of IYCF counselling in baby friendly spaces and mother-to- mother support groups:</b><br>- In Jordan: 15,600 mothers in 18 months in Jordan <sup>9</sup><br>- In Kenya: 581 facilitators trained in IYCF <sup>36</sup>                                                                                                                                                                                                                                                                                                                                                                                                                                                                                                                                                                                                                                                                                                                                                  |

|                                                                                                                                                                                                                                                                                                                                                                 |                                                                              |                                                                                                   |                                                                                                                 |                                                                                                                                                                                                                                                                                                                                                                                                |                                                                                                                                                                                                                                                                                                                                                                                                                         |
|-----------------------------------------------------------------------------------------------------------------------------------------------------------------------------------------------------------------------------------------------------------------------------------------------------------------------------------------------------------------|------------------------------------------------------------------------------|---------------------------------------------------------------------------------------------------|-----------------------------------------------------------------------------------------------------------------|------------------------------------------------------------------------------------------------------------------------------------------------------------------------------------------------------------------------------------------------------------------------------------------------------------------------------------------------------------------------------------------------|-------------------------------------------------------------------------------------------------------------------------------------------------------------------------------------------------------------------------------------------------------------------------------------------------------------------------------------------------------------------------------------------------------------------------|
| Groups (n=10) <sup>(10, 13, 14, 18-21, 32, 40, 44)</sup>                                                                                                                                                                                                                                                                                                        | - Refugees: Albania, Croatia, Jordan, Kenya, Lebanon<br>- Not Specified: CAR | - Community: South Sudan, Sudan<br>- Containers: Croatia<br>- Primary healthcare centers: Lebanon | lactation consultant, IYCF counsellors, and community mobilisers                                                | - Formation of mother to mother/caregiver support groups<br>- Distribution of high energy biscuit, a bottle of water, and shawls for privacy<br>- Distribution of food vouchers to mothers for nutritional security and psychological support<br>- Screening of children for malnutrition                                                                                                      | - In CAR: 199 mothers/ caregivers given psychosocial support <sup>16</sup><br><b>Other Outcomes:</b><br>- In Jordan: 120-150 mothers/day visited baby friendly spaces in Jordan <sup>9</sup><br>- In Jordan: 50 women attended support group gatherings <sup>17</sup><br>- In Sudan: 14,272 infant/ mother pairs attended MtMSG <sup>43</sup><br>- In Kenya: 713 MtMSG (2801 mothers/caregivers in MtMSG) <sup>36</sup> |
| Lactation Support Service (n=3) <sup>(10, 13, 19)</sup>                                                                                                                                                                                                                                                                                                         | - Refugees: Albania, Jordan, Lebanon,                                        | - Camps: Albania, Jordan<br>- Community: Lebanon                                                  | - Trained Physician (Lactation specialists, obstetrician/gynecologist)<br>- Paramedic Staff (midwives)          | - Assist mothers for re-lactation and in breastfeeding difficulties (painful nursing, latching problems, low breast milk production, and on correct positioning for feeding)                                                                                                                                                                                                                   | <b>Coverage of counselling:</b><br>- In Lebanon: 3,150 mothers in 6 months <sup>27</sup>                                                                                                                                                                                                                                                                                                                                |
| Baby Friendly Hospital Initiative (n=2) <sup>(13, 35)</sup>                                                                                                                                                                                                                                                                                                     | - Refugees: Lebanon<br>- Not Specified: Bosnia-Herzegovina                   | - Camps: Lebanon                                                                                  | - Not Specified                                                                                                 | - Labelling of maternity wards as “baby-friendly” to support breastfeeding<br>- Capacity building of health workforce<br>- Provision of tools and equipment to support breastfeeding, reducing use of BMS                                                                                                                                                                                      | In Bosnia-Herzegovina, from 1997-1999:<br>- Predominant breastfeeding increased from 64.3% to 77.3%<br>- Continued breastfeeding at 2 years increased from 8.5% to 40.7%                                                                                                                                                                                                                                                |
| Breast Milk Substitutes (n=5) <sup>(13, 14, 19, 21, 41)</sup>                                                                                                                                                                                                                                                                                                   | - Refugees: Jordan, Lebanon<br>- Not Specified: Greece, Iraq                 | - Camps: Greece, Iraq, Jordan and Lebanon                                                         | - Trained Physician (lactation specialists, and obstetrician/ gynecologist)<br>- Paramedic Staff (IYCF midwife) | - Training of healthcare staff and mothers on artificial feeding<br>- Counselling of mothers on importance of breastfeeding, appropriate use of infant formula and on adverse effects of artificial feeding on infant’s health<br>- Monitor and control the distribution of infant formula- - Provision of BMS supplies and kits (cups and clean water) for safe preparation of infant formula | - In Lebanon: 50 infants were assisted with artificial feeding support <sup>27</sup><br>- In Jordan: Seven mothers received artificial milk supplies <sup>9</sup>                                                                                                                                                                                                                                                       |
| <b>Key:</b> Breast Milk Substitutes (BMS); Internally Displaced Persons (IDPs); Infant and Young Child Feeding (IYCF); Infant and Young Child Feeding in Emergencies (IYCF-E); Traditional Birth Attendants (TBAs), Pregnant and Lactating Women (PLWs); Exclusive Breastfeeding (EBF); Central African Republic (CAR), Mother to mother support groups (MtMSG) |                                                                              |                                                                                                   |                                                                                                                 |                                                                                                                                                                                                                                                                                                                                                                                                |                                                                                                                                                                                                                                                                                                                                                                                                                         |

## 334 **Implementation Guidelines**

335  
336 We included 30 implementation guidelines by different organizations in our review, mentioning key  
337 policies and operational guidelines to be followed during conflicts to ensure optimal IYCF practices  
338 (1, 2, 6, 26, 30, 33, 43, 45-68). Eight guidelines were by international NGOs<sup>(1, 30, 33, 43, 46, 51, 59, 67)</sup> nine by UN  
339 agencies<sup>(6, 47, 50, 53, 55-57, 65, 66)</sup>, and three by academic organizations<sup>(48, 49, 64)</sup>, while ten guidelines were  
340 formulated by collaboration between developmental partners and international NGOs<sup>(2, 26, 45, 52, 54, 58,</sup>  
341 <sup>60-63)</sup>. These implementation guidelines were formulated after conducting random cluster surveys  
342 (including quantitative and qualitative analysis), meetings to gathering empirical evidence, past  
343 emergency experiences, and technical guidance from community, stakeholders, development and  
344 implementation partners (appendix table 1).

345  
346 We included implementation guidelines from 1981 through 2018. Only one guideline was from 1981-  
347 1990<sup>(50)</sup>, seven were from 1991-2000<sup>(30, 47, 51, 53, 54, 66, 67)</sup>, 12 were from 2001-2010<sup>(2, 6, 43, 46, 48, 49, 52, 55,</sup>  
348 <sup>56, 62, 63, 68)</sup>, and ten were from 2011-2018<sup>(1, 26, 33, 45, 57-59, 61, 64, 65)</sup>. These guidelines focused on refugees  
349 and IDPs affected by conflict. We summarized these operational guidelines from different  
350 organizations, to be used during conflict settings, using the components from 'WHO's guiding  
351 principles for feeding infants and young children during emergencies'<sup>(6)</sup> (Figure 4).

### 352 353 **Breastfeeding**

354  
355 The guidelines on protecting, promoting and supporting breastfeeding were mentioned by 28  
356 publications (1, 2, 6, 26, 30, 33, 43, 45-55, 57-67). They recommend to practice EBF till six months of age,  
357 followed by frequent breastfeeding until two years, along with complementary feeding to protect  
358 babies from infection, especially in crisis situations. There should be formation of practical  
359 guidelines, capacity building of healthcare staff, and continuous flow of funds for the sustainability  
360 of programs.

361  
362 General population (including mothers) should be educated on breastfeeding, its benefits, colostrum  
363 use, feeding methods, and consequences of artificial feeding based on 'UNICEF/WHO Baby friendly  
364 Hospital's initiative's Ten Steps to breastfeeding'. Moreover, mothers should be counselled not to  
365 stop breastfeeding in emergency situations, sickness, and when malnourished. They should be  
366 encouraged to practice skin-to-skin contact, initiate breastfeeding within the first hour of birth, and  
367 use of pacifiers, artificial nipples and estrogen containing contraceptive pills should be discouraged.

368  
369 Guidelines also recommend formation of baby friendly spaces and mother to mother support groups  
370 to encourage breastfeeding and privacy. There should be a system set in place for identification of  
371 newly arriving mothers and children, registration for rations and referral for immediate assistance.  
372 Mothers should be facilitated for re-lactation if separated from the baby or experiencing difficulties  
373 in breastfeeding. When natural breastfeeding is not possible, wet-nursing and the use of milk banks  
374 should be considered before providing infant formula or home-modified milk.

### 375 376 **Breast-Milk Substitutes (BMS)**

377 Twenty-six guidelines reported on the use of BMS in emergency situations (1, 2, 6, 30, 33, 43, 45-55, 57-62, 64,  
378 <sup>65, 67)</sup>. Donations, procurement, promotion (through advertisements and gifts) and distribution of

1  
2  
3 379 BMS, bottles and teats should be strictly controlled and should comply with the International Code  
4 380 and World Health Assembly regulations, and all violations should be reported (see Box 2). The  
5 381 distribution should be managed by a single designated agency and blanket distribution of BMS should  
6 382 be discouraged in emergency situations, especially where hygienic conditions can't be ensured.  
7 383

8 384 BMS are not recommended for children under 6 months of age and should only be distributed to  
9 385 infants who have no other viable breast milk options i.e. orphans, severe maternal illness or  
10 386 malnutrition (based on established criteria- where distribution can be targeted, the supply chain is  
11 387 secure, and the conditions for safe preparation and use can be met), determined by a qualified health  
12 388 worker trained in IYCF. There should be training of workforce handling BMS and demonstrations  
13 389 should be given to mothers on proper and safe use of infant formula, followed by regular infant health  
14 390 and growth monitoring. Availability of fuel, safe water and equipment should be ensured before BMS  
15 391 distribution and mothers should be advised to use cups instead of bottles for feeding. Moreover, it  
16 392 should be ensured that distribution of BMS to the targeted infant continues for as long as the infant  
17 393 needs (at least 6 months).  
18  
19  
20  
21 394

22 395 Infant formula (generic, unbranded formula) should be distributed with labels in the local language  
23 396 to the infants in need. These labels should have clear instructions on its safe preparation, along with  
24 397 stating the importance of breast milk. Infant formula should not be excluded from the commodities  
25 398 that a mother can access via cash/voucher schemes, but it should have clear information on superiority  
26 399 of breastfeeding. For infants under six months of age, the only suitable BMS is infant formula and  
27 400 condensed milk should not be used for infant feeding and home-modified milk should be the last  
28 401 resort.  
29  
30

31 403 Relief workers should ensure that milk products are received and distributed in a dry form and dried  
32 404 milk products are distributed only when pre-mixed with a milled staple food and should not be  
33 405 distributed as a single commodity. Moreover, it should be ensured that dried skimmed milk is not  
34 406 given to infants and for older children, it should be given after fortifying it with vitamin A. Relief  
35 407 and healthcare workers should counsel mothers to avoid baby juices and teas, and they should take  
36 408 appropriate measures to reduce spill-over by ensuring that feeding BMS to a minority of children  
37 409 doesn't undermine breastfeeding practices of the majority. In case of unfavorable circumstances for  
38 410 BMS distribution, an on-site supplementary "wet" feeding program should be conducted in closed  
39 411 spaces under supervision.  
40  
41 412  
42  
43  
44  
45  
46  
47  
48  
49  
50  
51  
52  
53  
54  
55  
56  
57  
58  
59



413

## Box 2: Violation of IYCF-Emergency guidelines in conflict settings (Case Studies)

### Case Study 1: Campaigning by Blédina company during Hezbollah–Israel Conflict, 2006: Lebanon

A marketing campaign by Bledina (production company of infant formula and complementary foods), after the war in 2006 in Beirut, offered mothers gift packages containing promotional leaflets. The attending pediatrician also gave mothers a card with the Blédina hotline. Moreover, free Blédina gift packages were also distributed at a health center which had a high number of refugees, as a promotional campaign after the war, which was a violation of the IYCF-Emergency guidelines<sup>(12, 46)</sup>.

### Case Study 2: Civil Unrest, 2002: East Timor

Healthcare facilities in Dili distributed infant formula donated by a service organization to assist infants who have been orphaned and mothers who are unable to breastfeed, which was a violation of the guidelines because health care facilities should not distribute infant formula as it can be wrongly interpreted as them promoting the products, even if they are doing so to meet the needs of the targeted population<sup>(46)</sup>.

### Case Study 3: Israel-Hezbollah conflict, 2006: Lebanon

1. During the Lebanon conflict, an NGO violated the IYCF-Emergency guidelines by distributing 1,500 ‘baby kits’, including infant formula and bottles, directly to displaced households, as well as to hospitals and local municipalities. Even after the conflict, the same NGO distributed ‘village kits’ containing infant formula (25 boxes containing 24 cans each) and baby food (80 units) along with other items to each village municipality<sup>(12, 46)</sup>.
2. Another violation was the donation of infant formula to the healthcare facilities by an international NGO during the Lebanon conflict<sup>(12)</sup>.
3. Moreover, one local NGO distributed the infant formula amongst the displaced population, without clearly specifying on the tins that it should only be used on the advice of a health worker thus violating the labelling requirements, and promoting infant formula use<sup>(12)</sup>.
4. Another violation occurred when single tins/samples of infant formula were distributed to mothers by health workers, without the undertaking that the infant formula supplies would continue for as long as the concerned infant needs them<sup>(12)</sup>.

### Case Study 4: Israel-Hezbollah conflict, 2006: Lebanon

1. The formulas received by Lebanese government organizations and NGOs had labels written in English and/or Greek, instead of the local language, Arabic<sup>(12, 46)</sup>.
2. One local NGO distributed infant formula, advertising and promoting artificial feeding, which was in violation of labelling requirements<sup>(12, 46)</sup>.

414

415 Complementary Feeding



1  
2  
3 416 Eighteen guidelines reported on complementary feeding in infants and young children 6-24 months  
4 417 of age<sup>(1, 6, 26, 43, 45, 48, 49, 51, 54, 55, 57-59, 61-65)</sup>. For normal growth and development of infants and children  
5 418 (>6 months), easily digestible complementary foods should be started along with continuation of  
6 419 breast milk. Discussions should be conducted in groups, and mothers should be encouraged to  
7 420 increase the frequency and variety of complementary food with the growing age of child to meet their  
8 421 nutritional demands. Mothers should be encouraged to use locally produced, inexpensive  
9 422 complementary foods. However, in emergency situations, micro-nutrient fortified blended foods,  
10 423 ready-to-use supplementary foods, lipid based nutrient supplements or ferrous sulphate iron solution  
11 424 (iron drops) can be used depending on nutritional situation. Relief workers should ensure that  
12 425 complementary food products are labelled in local language with instructions on preparation and do  
13 426 not have the images of bottle feeding on them, and donations of complementary foods, baby teas or  
14 427 juices should be refused. For children over the age of 12 months, it is recommended that they should  
15 428 eat the same food as older children. If safe complementary foods are not available, mothers should  
16 429 be advised to continue breastfeeding.

### 20 430 Caring for Caregivers and Protecting Children

21  
22 431 Thirteen guidelines reported on caring for caregivers during emergencies<sup>(1, 6, 33, 45, 52, 58, 60-62, 64-67)</sup> and  
23 432 nine reported on protecting children<sup>(1, 33, 45, 48, 49, 52, 57-59, 61, 62, 64, 67)</sup>. Guidelines recommend provision  
24 433 of psychological support and empowering mothers during crisis and advising them to continue  
25 434 breastfeeding (via milk expression). It should be ensured that infants are screened for childhood  
26 435 illnesses and mothers of artificially-fed infants have access to cleaning facilities for washing utensils  
27 436 for safe preparation of BMS as artificially-fed infants are known to be at a greater risk of malnutrition,  
28 437 diarrhea and chest infections. If an infant is ill with reduced appetite, mothers should continue  
29 438 breastfeeding with smaller amounts and increased frequency. Relief staff should prioritize infants for  
30 439 re-lactation, re-establishment of exclusive breastfeeding and BMS provision and associated support  
31 440 services.

### 35 441 Malnutrition

36  
37 442 Nine guidelines reported on management of malnutrition in infants and young children during  
38 443 emergencies<sup>(1, 6, 52, 54, 55, 58, 60, 65, 67)</sup>. Guidelines recommend continuous monitoring of nutritional status  
39 444 of mothers, infants and young children with the purpose of identifying, assessing, preventing and  
40 445 treating malnourished mothers and children. Malnutrition treatment and prevention programs should  
41 446 incorporate and prioritize IYCF in their agenda as the risk can be decreased with optimal IYCF  
42 447 practices. Education should be provided to community support networks on the prevention and  
43 448 treatment of acute malnutrition and cash/voucher programs should be introduced. For prevention of  
44 449 malnutrition, micronutrients should be distributed to all pregnant and lactating women in form of  
45 450 powders and tablets. It is recommended to identify malnourished children through regular monitoring  
46 451 and they should be referred and admitted along with their mothers to a nutritional rehabilitation  
47 452 program in case of severe malnourishment. In crisis situations, supplementary feeding should be the  
48 453 primary strategy for prevention and treatment of moderate acute malnutrition and pre-formulated  
49 454 therapeutic milk products or dried skimmed milk can be used to treat severe acute malnutrition.

### 52 455 53 456 The Acute Phase of Emergencies

1  
2  
3 457 Twelve guidelines reported on interventions to be undertaken during the acute phase of emergencies  
4 458 (1, 2, 6, 43, 45, 51, 55, 58, 61, 62, 64, 67). In case of an emergency, interventions should start immediately with  
5 focus on capacity building to improve IYCF practices, supporting caregivers and catering to  
6 459 nutritional needs of children in order to minimize the negative impact of emergency. In places with  
7 460 prior high infant formula use, appropriate interventions should be undertaken by relevant  
8 461 organizations to increase prevalence of appropriate IYCF practices and increase the rate of EBF and  
9 462 measures should be taken to monitor BMS donations and distribution during early phases of  
10 463 emergencies. Moreover, mothers should be educated and encouraged to breastfeed every 2-3 hours  
11 464 at breastfeeding stations scattered across refugee sites. If mothers are experiencing difficulty in  
12 465 breastfeeding, chlorpromazine can be used to stimulate milk production and wet-nursing and milk  
13 466 banks can also be used as an alternative to BMS.  
14 467

#### 16 17 468 Assessment, Intervention and Monitoring

18 469  
19 470 Fifteen guidelines mentioned assessment, intervention and monitoring during emergencies (1, 2, 6, 26, 45,  
20 471 51, 52, 57-61, 64, 65, 67). There should be regular systematic monitoring to track BMS distribution and  
21 472 careful monitoring of optimal feeding and nutritional status of infants and young children. It is  
22 473 recommended to conduct weight monitoring, assess intake, urination frequency, and activity level for  
23 474 those receiving BMS. Healthcare staff should use qualitative as well as quantitative methods to gather  
24 475 data regarding pre-crisis practices, demographics, morbidity, mortality, malnutrition and current  
25 476 IYCF practices.  
26 477

27 477  
28 478 Breastfeeding and HIV  
29  
30 479 Ten guidelines reported on breastfeeding in HIV situations (1, 45, 47, 55-58, 60, 63, 67). Guidelines  
31 480 recommend that appropriate measures should be undertaken to prevent mother-to-child transmission  
32 481 of HIV, and improve child survival from HIV. If the mother's HIV status is negative or unknown (or  
33 482 HIV testing is not available), she should be advised to continue age appropriate breastfeeding and  
34 483 replacement feeding should only be supported if is acceptable, feasible, affordable, sustainable and  
35 484 safe. For sustainable access to medical care, HIV positive mothers should be provided with  
36 485 antiretroviral treatment and even in case of unavailability, breastfeeding should be continued.

37  
38  
39 486 If HIV-positive mothers choose not to breastfeed the infant, appropriate BMS should be provided  
40 487 along with counselling on the risks of mixed feeding and artificial feeding. Wet nursing should also  
41 488 be considered in cases of HIV-positive mothers and wet nurse should be counseled on prevention of  
42 489 disease transmission. IYCF staff should make supportive arrangements for HIV-positive mothers to  
43 490 build confidence, reduce isolation, encourage age appropriate feeding and educate the family  
44 491 members to provide full support to the mothers and conduct regular follow ups. Furthermore,  
45 492 activities related to Prevention/Elimination of Mother-to-Child Transmission should be regularly  
46 493 done as part of nutritional interventions and the measures taken by ICYF staff should be sensitive.

#### 49 50 494 **DISCUSSION**

51  
52 495 This review included a total of 56 primary studies, comprising of 11 published articles and 45 reports  
53 496 from grey literature. The included studies covered IYCF practices, programs and guidelines for the  
54 497 countries affected by armed conflict. The review shows that the coverage of IYCF practices are low  
55 498 in conflict settings; with only half of the children receiving early initiation of breastfeeding and only  
56  
57  
58  
59

1  
2  
3 499 a quarter being exclusively breastfed. The other IYCF indicators are also not encouraging, with high  
4 500 rates of bottle-feeding.  
5

6  
7 501 The low IYCF indicators can be attributed to a multitude of factors in conflict settings which may  
8 502 also exist in non-conflict settings, though armed conflicts tend to aggravate and amplify these and  
9 503 there are also factors unique to conflict settings. Displacement, stress, maternal malnourishment, lack  
10 504 of awareness, and unavailability of trained healthcare professionals, are all reasons contributing to  
11 505 poor IYCF. The death of the male members within the family also poses an additional barrier, as apart  
12 506 from increased maternal mental stress, it also leads to additional maternal responsibilities. This in  
13 507 turn may compromise the mothers' ability to provide attention to their children. The review highlights  
14 508 certain misconceptions in the community that contribute to the misguided belief that maternal  
15 509 malnourishment and stress lead to insufficient quantity and quality of breast milk and may stimulate  
16 510 the undesired use of BMS. Additionally, in some instances health workers due to their lack of  
17 511 awareness and knowledge, advocated for and prescribed BMS resulting in the unregulated marketing,  
18 512 provision and distribution of BMS.  
19  
20

21 513 The evidence from this review suggests that there is a need to enhance the capacity of health workers  
22 514 and to improve their communication with the community by using various channels including  
23 515 pictorials, videos or face to face meetings. Though various programs have been initiated in conflict  
24 516 settings<sup>(69)</sup>; unfortunately, none of them have been formally evaluated to gauge the impact of these  
25 517 different approaches on IYCF indicators. As shown in the review, the major evidence and  
26 518 recommendations derived from the experiences of the various implementation agencies working in  
27 519 such contexts rather than from scientific evaluation of programs. These guidelines suggest that first  
28 520 and foremost, the importance of IYCF should be underscored and it should be a top priority for  
29 521 improving the health of children in conflict settings. There should be early dissemination of policies  
30 522 to all concerned agencies and healthcare workers. And steps should be taken to register women and  
31 523 mothers in camps, as IDPs or as residents of conflict-inflicted areas. The educational approaches  
32 524 should be drafted with specific messages to alleviate the context-specific misconceptions within the  
33 525 community. There is evidence from various communications platforms which could be utilized to  
34 526 spread relevant messages including women support groups, involving prominent community  
35 527 members, designing pictorials, brochures or videos. The need for designated places like feeding tents  
36 528 was also emphasized as these could provide personal spaces for women to feed their children, seek  
37 529 support from peers and also use them as avenues for skin to skin care for preterm and low birth-  
38 530 weight infants. The provision of clean hygienic utensils and safe drinking water should also be  
39 531 ensured for preparing complementary feeds. The guidelines also emphasize the need for  
40 532 strengthening BFHI in the functioning health facilities. Apart from access to required healthcare,  
41 533 mothers should also be provided with lactation and psychological support. The factors identified  
42 534 which negatively affect IYCF practices include, high turnover rate of health workers, lack of funds,  
43 535 poor multi-sectoral coordination, poor monitoring and evaluation system, more focus on malnutrition  
44 536 treatment than prevention, strengthened marketing efforts of BMS by industries, and poor capacity at  
45 537 community level.  
46  
47  
48  
49  
50

51 538 The additional approaches identified included 'wet nurse' and 'milk banks' which could be sought  
52 539 after confirmation from specialists solely for mothers who were unable to breastfeed. BMS should be  
53 540 treated as the last resort<sup>(3)</sup> and efforts should be put in place that allow for stringent regulatory checks  
54 541 on BMS, nipples and pacifiers<sup>(3, 70)</sup>. All of the commodities in a conflict setting should flow through  
55 542 a common medium and designated agency/agencies, who should be responsible for controlling  
56  
57  
58  
59  
60

1  
2  
3 543 donations and distributing appropriately labeled infant formula, and any violation to these should be  
4 544 reported with timely action taken.  
5

6  
7 545 The major strength of our review is that it systematically looks at various areas of IYCF which  
8 546 includes current IYCF practices, specific barriers and strategies to improve breastfeeding and  
9 547 complementary feeding using evidence from implementation guidelines. The limitations of our  
10 548 review include restricted access to studies conducted by various NGOs/ agencies as most of them do  
11 549 not report and inclusion of articles was limited to English language only and only three studies were  
12 550 included from conflict-affected countries in the Asian region. Some of the included studies missed  
13 551 on reporting important information like reporting on study context (e.g. year and scale of  
14 552 conflict/surveys), outcomes, process indicators and program impact. Hence, there is a critical need of  
15 553 further research on the process of implementation, effectiveness of IYCF interventions and cost  
16 554 effectiveness of these interventions in conflict settings.  
17  
18

19 555 To ensure effective scale-up of interventions for promotion of IYCF in conflict settings, the emphasis  
20 556 of the stakeholders should be on advocacy and implementation of evidence-based context specific  
21 557 interventions. A multi-sectoral approach together with stringent monitoring and evaluation  
22 558 mechanisms should be in place with capacity building and accountability.  
23  
24

25 559  
26  
27  
28  
29  
30  
31  
32  
33  
34  
35  
36  
37  
38  
39  
40  
41  
42  
43  
44  
45  
46  
47  
48  
49  
50  
51  
52  
53  
54  
55  
56  
57  
58  
59  
60

560 **LIST OF ABBREVIATIONS**

|    |        |                                                                 |
|----|--------|-----------------------------------------------------------------|
| 6  | BFHI   | Baby Friendly Hospital Initiative                               |
| 7  | BMS    | Breast-Milk Substitutes                                         |
| 8  | EBF    | Exclusive Breastfeeding                                         |
| 9  | HIC    | High Income Countries                                           |
| 10 | HIV    | Human Immunodeficiency Virus                                    |
| 11 | IYCF   | Infant and Young Child Feeding                                  |
| 12 | LMIC   | Low- and Middle-Income Countries                                |
| 13 | MESH   | Medical Subject Headings                                        |
| 14 | NGO    | Non-Governmental Organization                                   |
| 15 | SMART  | Standardized Monitoring and Assessment of Relief and Transition |
| 16 | UN     | United Nations                                                  |
| 17 | UNHCR  | The United Nations High Commissioner for Refugees               |
| 18 | UNICEF | United Nations International Children's Emergency Fund          |
| 19 | WHO    | World Health Organization                                       |

561

1  
2  
3 562 **DECLARATIONS**  
4

5 563 **Ethical Approval**  
6

7 564 We obtained ethical approval of this study from the Ethical Review Committee of Aga Khan  
8 565 University, Karachi and the National Bioethics Committee, Pakistan.  
9

10 566 **Consent for Publication**  
11

12 567 Not Applicable  
13

14 568 **Acknowledgements**  
15

16 569 None  
17

18 570 **Competing Interests**  
19

20 571 All the authors declare no conflict of interest. The corresponding author is the overall guarantor and  
21 572 affirms that the manuscript is an honest, accurate, and transparent account of the study.  
22

23 573 **Data Sharing**  
24

25 574 The datasets used for analysis in this study are available from the corresponding author on  
26 575 reasonable request. As this is a systematic review, dissemination to the groups is not applicable.  
27

28 576 **Funding**  
29

30 577 The support of the Family Larsson-Rosenquist Foundation is greatly acknowledged. The funders had  
31 578 no role in the findings and writing of the manuscript.  
32

33 579 **Authors' Contributions**  
34

35 580 ZAB and JKD conceived the idea of the review. ZAP developed the search strategy; AR, ZAP and  
36 581 FAS conducted the search and data extraction with specific inputs from JKD. AR, ZAP and JKD  
37 582 developed the first draft of the paper. ZAB and JKD reviewed and finalized the final manuscript.  
38

39 583 **ORCID ID**  
40

41 584 Zahra A. Padhani: <https://orcid.org/0000-0003-4777-7565>  
42

43 585 Faareha A Siddiqui: <https://orcid.org/0000-0001-9623-890X>  
44  
45  
46  
47  
48  
49  
50  
51  
52  
53  
54  
55  
56  
57  
58  
59  
60



587 **REFERENCES**

- 588 1. ACF-International. Infant and Young Child Feeding in Emergencies. 2015 December 2015.
- 589 2. Borrel A, Taylor A, McGrath M, Seal A, Hormann E, Phelps L, et al. From policy to  
590 practice: challenges in infant feeding in emergencies during the Balkan crisis. *Disasters*.  
591 2001;25(2):149-63.
- 592 3. Campbell S. Global challenges in protecting and promoting breastfeeding. *primary health*  
593 *care*. 2008;18(1).
- 594 4. Sinha B, Chowdhury R, Sankar MJ, Martines J, Taneja S, Mazumder S, et al. Interventions  
595 to improve breastfeeding outcomes: a systematic review and meta-analysis. *Acta Paediatrica*.  
596 2015;104:114-34.
- 597 5. Essential nutrition actions: mainstreaming nutrition through the life-course. Geneva: World  
598 Health Organization; 2019. Licence: CC BY-NC-SA 3.0 IGO.
- 599 6. WHO. Guiding principles for feeding infants and young children during emergencies. 2004.
- 600 7. Victora CG, Bahl R, Barros AJD, França GVA, Horton S, Krasevec J, et al. Breastfeeding in  
601 the 21st century: epidemiology, mechanisms, and lifelong effect. *The Lancet*.  
602 2016;387(10017):475-90.
- 603 8. Davanzo R. Newborns in adverse conditions: issues, challenges, and interventions. *J*  
604 *Midwifery Womens Health* 2004;49(4 Suppl 1):29-35.
- 605 9. Seal A, Taylor A, Gostelow L, McGrath M. Review of policies and guidelines on infant  
606 feeding in emergencies: common ground and gaps. *Disasters*. 2001;25(2):136-48.
- 607 10. Bustreo F, Genovese E, Omobono E, Axelsson H, Bannon I. Improving child health in post-  
608 conflict countries: Can the World Bank contribute. The World Bank. 2005.
- 609 11. O'Connor ME, Burkle FM, Jr., Olness K. Infant feeding practices in complex emergencies: a  
610 case study approach. *Prehosp Disaster Med*. 2001;16(4):231-8.
- 611 12. Maclaine A. Infant feeding in emergencies: experiences from Lebanon. 2007. Contract No.:  
612 37.
- 613 13. Darjani P, Berbari LS. Infant and young child feeding support in Lebanon: strengthening the  
614 national system. *ENN [Internet]*. 2014 Nov [cited 2019 Apr 17]; (48):20. Available from:  
615 <https://www.enonline.net/fex/48/infant>.
- 616 14. Alsamman S. Managing infant and young child feeding in refugee camps in Jordan. *ENN*  
617 *[Internet]*. 2014 Nov [cited 2019 Apr 17]; (48):85. Available form:  
618 <https://www.enonline.net/fex/48/managinginfant>.
- 619 15. Ploughshares P. Armed Conflict 2016 [Available from: [http://ploughshares.ca/armed-](http://ploughshares.ca/armed-conflict/defining-armed-conflict/)  
620 [conflict/defining-armed-conflict/](http://ploughshares.ca/armed-conflict/defining-armed-conflict/)].
- 621 16. Bank W. New country classifications by income level: 2018-2019 2018 [Available from:  
622 <https://blogs.worldbank.org/opendata/new-country-classifications-income-level-2018-2019>].
- 623 17. Analytics C. Endnote Software [Available from: <https://endnote.com/>].
- 624 18. Dozio E, Peyre L, Morel SO, Bizouerne C, Black. Integrated psychosocial and food security  
625 approach in an emergency context: Central African Republic. *Intervention: Journal of Mental*  
626 *Health and Psychosocial Support in Conflict Affected Areas*. 2016;14(3):257-71.
- 627 19. Fander G, Frega M. Responding to nutrition gaps in Jordan in the Syrian Refugee Crisis:  
628 Infant and Young Child Feeding education and malnutrition treatment. *ENN [Internet]*. 2014 Nov  
629 [cited 2019 Apr 17]; (48): 82. Available from: <https://www.enonline.net/fex/48/responding>.
- 630 20. Ndungu P, Tanaka J. Using care groups in emergencies in South Sudan. *ENN [Internet]*.  
631 2017 Feb [cited 2019 Apr 17]; (54): 95. Available from:  
632 <https://www.enonline.net/fex/54/emergenciesinsouthsudan>.



- 1  
2  
3 633 21. Seguin J. Challenges of IYCF and psychosocial support in Lebanon. ENN [Internet]. 2014  
4 634 Nov [cited 2019 Apr 17]; (48): 24. Available from: <https://www.enonline.net/fex/48/challenges>.
- 5 635 22. Khudari WHO response to malnutrition in Syria: a focus on surveillance, case detection and  
6 636 clinical management. ENN [Internet]. 2014 Nov [cited 2019 Apr 17]; (48): 118. Available from:  
7 637 <https://www.enonline.net/fex/48/whosyria>.
- 8 638 23. Sallam AK, Albably K, Zvandaziva C, Singh K. Community engagement through local  
9 639 leadership: Increasing access to nutrition services in a conflict setting in Yemen. ENN [Internet].  
10 640 2018 Jan [cited 2019 Apr 17]; (9):10. Available from:  
11 641 <https://www.enonline.net/nex/9nutserviceaccessyemen>.
- 12 642 24. Bile KM, Hafeez A, Kazi GN, Southall D. Protecting the right to health of internally  
13 643 displaced mothers and children: the imperative of inter-cluster coordination for translating best  
14 644 practices into effective participatory action. Eastern Mediterranean Health Journal.  
15 645 2011;17(12):981-9.
- 16 646 25. Aakre I, Lilleengen AM, Aarsand ML, Strand TA, Barikmo I, Henjum S. Infant feeding  
17 647 practices in the Saharawi refugee camps Algeria, a cross-sectional study among children from birth  
18 648 to six months of age. International breastfeeding journal. 2016;12(1):8.
- 19 649 26. Amelia Reese Masterson, Shiromi M. Perera, Moghames P. Camp-based Barrier Analysis of  
20 650 Early Initiation of Breastfeeding, Iron-rich Food Consumption, and Early Antenatal Care Seeking  
21 651 Behaviors of Syrian Refugees in Azraq Camp, Jordan. International Medical Corps  
22 652 USAID; 2016.
- 23 653 27. Andersson N, Paredes-Solis S, Legorreta-Soberanis J, Cockcroft A, Sherr L. Breast-feeding  
24 654 in a complex emergency: four linked cross-sectional studies during the Bosnian conflict. Public  
25 655 health nutrition. 2010;13(12):2097-104.
- 26 656 28. Children St. Emergency WASH & Nutrition for conflict affected people in Yemen – Taiz  
27 657 governorate. 2017.
- 28 658 29. Diwakar V, Malcolm M, Naufal G. Violent Conflict and Breastfeeding: The Case of Iraq.  
29 659 2017.
- 30 660 30. Hunger AA. Infant Feeding and Weaning Report 2000.
- 31 661 31. Jakobsen M, Sodemann M, Nylén G, Bale C, Nielsen J, Lisse I, et al. Breastfeeding status as  
32 662 a predictor of mortality among refugee children in an emergency situation in Guinea-Bissau. Trop  
33 663 Med Int Health. 2003;8(11):992-6.
- 34 664 32. Mary S Lung'aho, Stone-Jiménez M. Mother-to-Mother Support Groups in the Dadaab  
35 665 Refugee Camps.
- 36 666 33. Prudhon C. Assessment of Infant and Young Child Feeding Practices among Refugees on  
37 667 Lesvos Island, Greece 2016.
- 38 668 34. Robertson A, Fronczak N, Jaganjac N, Hailey P, Copeland P, Duprat M. Nutrition and  
39 669 immunization survey of Bosnian women and children during 1993. Int J Epidemiol.  
40 670 1995;24(6):1163-70.
- 41 671 35. Šumanović-Glamuzina D. Breastfeeding practice in Bosnia and Herzegovina. Journal of  
42 672 Pediatric and Neonatal Individualized Medicine (JPNIM). 2013;2(1):55-62.
- 43 673 36. Summers A, Bilukha OO. Suboptimal infant and young child feeding practices among  
44 674 internally displaced persons during conflict in eastern Ukraine. Public Health Nutr. 2018;21(5):917-  
45 675 26.
- 46 676 37. Theurich MA, Grote V. Are commercial complementary food distributions to refugees and  
47 677 migrants in Europe conforming to international policies and guidelines on infant and young child  
48 678 feeding in emergencies? Journal of Human Lactation. 2017;33(3):573-7.

- 1  
2  
3 679 38. UNHCR. UNHCR Nutrition Survey among Afghan Refugees Residing in Afghan Refugee  
4 680 Villages of Pakistan. 2014.  
5 681 39. WHO. Indicators for assessing infant and young child feeding practices. 2008.  
6 682 40. Saraswati Khalsa, Emily Hejn, Sarriot E. Systems Effects Of Save The Children Emergency  
7 683 Health & Projects Sudan. 2019.  
8 684 41. Holland R. Frontline: Support for breastfeeding in crisis. *Lancet*. 2017;390(10097):834.  
9 685 42. Mukunya D, Tumwine JK, Nankabirwa V, Ndeezi G, Odongo I, Tumuhamy J, et al.  
10 686 Factors associated with delayed initiation of breastfeeding: a survey in Northern Uganda. *Glob*  
11 687 *Health Action*. 2017;10(1):1410975.  
12 688 43. Program WIEPoB. Infant and Young Child Feeding in Emergency Situations. 1996.  
13 689 44. Renata Jelušić R. Support for breastfeeding and young child feeding in emergencies.  
14 690 Experiences gained during the migrant and refugee crisis in Croatia in 2015 and 2016. 2017.  
15 691 45. Group IC. Infant and Young Child Feeding in Emergencies Operational Guidance for  
16 692 Emergency Relief Staff and Programme Managers. 2017 October 2017.  
17 693 46. Focus I. The Code and infant feeding in emergencies. 2009 May 2009.  
18 694 47. Machel G. Impact of Armed Conflict on Children. United Nations; 1996 26 August 1996.  
19 695 48. Association ILC. Breastfeeding: A Vital Emergency Response. Are You Ready? . 2009.  
20 696 49. Association ILC. Breastfeeding: A Vital Emergency Response. Are You Ready? For relief  
21 697 workers. 2009.  
22 698 50. WHO. International Code of Marketing of Breast-milk Substitutes. Geneva; 1981.  
23 699 51. OXFAM. Feeding in Emergencies For Infants Under Six Months: Practical Guidelines  
24 700 1996.  
25 701 52. WHO, UNICEF, LINKAGES, IBFAN, ENN. Infant feeding in emergencies Module 1 (for  
26 702 emergency relief staff). 2001 November 2001.  
27 703 53. WHO. WHA RESOLUTION 47.5- Infant and young child nutrition. 1994.  
28 704 54. Joint UNICEF U, WFP, WHO Statement Policy on infant feeding in the Balkan Region.  
29 705 55. UNHCR. UNHCR Policy Related To The Acceptance, Distribution And Use Of Milk  
30 706 Products In Refugee Settings 2006.  
31 707 56. UNHCR. Guidance on Infant feeding and HIV in the context of refugees and displaced  
32 708 populations. 2008 April 2008.  
33 709 57. UNHCR. Infant and young child feeding practices- Standard Operating Procedures for the  
34 710 Handling of Breastmilk Substitutes (BMS) in Refugee Situations for children 0-23 months. 2015  
35 711 August 2015.  
36 712 58. UNHCR, children St. Infant and Young Child Feeding in Refugee Situations: A Multi-  
37 713 Sectoral Framework for Action. 2018 May, 2018.  
38 714 59. ACF-International. Baby friendly spaces. Holistic approach for Pregnant, Lactating Women  
39 715 and their very young children in Emergency. 2014 December 2014.  
40 716 60. ENN, IBFAN-GIFA, Fondation Terre des hommes, Action Contre la Faim, CARE USA,  
41 717 LINKAGES, et al. Infant feeding in emergencies (for health and nutrition workers in emergency  
42 718 situations). 2007.  
43 719 61. Refugees UHCf. Interim Operational Considerations for the feeding support of Infants and  
44 720 Young Children under 2 years of age in refugee and migrant transit settings in Europe. 2015.  
45 721 62. Save the Children U, Food Security and Nutrition Network. IYCF-E Toolkit: Summary of  
46 722 Operational Guidance on ICF-E Key Points and WHA Resolution. 2007.  
47 723 63. Save the Children U, Food Security and Nutrition Network. ICFY-E Toolkit: Summary of  
48 724 Feeding the Non-breastfed child 6- 24 months of Age 2007.

- 1  
2  
3 725 64. Pediatrics AAO. Infant feeding in disasters and emergencies. 2015.  
4 726 65. UNICEF. UNICEF Guidance on the provision and use of breastmilk substitutes in  
5 727 humanitarian settings. 2018 June 2018.  
6 728 66. UNHCR. HOW TO GUIDE reproductive health in refugee setting (Strengthening Safe  
7 729 Motherhood Services). 1999 November 1998.  
8 730 67. ENN. Infant Feeding in Emergencies: Policy, Strategy and Practice. 1999 May 1999.  
9 731 68. McGrath M, Seal A, Taylor A, Gostelow L. Meeting the nutritional needs of infants during  
10 732 emergencies: Recent experiences and dilemmas: Report of an international workshop, Institute of  
11 733 Child Health, London, November 1999. 2000.  
12 734 69. members UCG. Humanitarian Development Nexus Stakeholder and Literature Analysis.  
13 735 2019.  
14 736 70. Aguayo VM RJ, Kanon S, Ouedraogo AN. Aguayo VM, Ross JS, Kanon S, Ouedraogo AN  
15 737 (2003) Monitoring compliance with the International Code of Marketing of Breastmilk Substitutes  
16 738 in west Africa: multisite cross sectional survey in Togo and Burkina Faso. British Medical Journal.  
17 739 326, 127. 2003.

## 740 **Figures and Tables**

741 Table 1: IYCF practices in conflict settings

742 Table 2: Programs/ Interventions to Promote Optimal IYCF Practices

743

744 Figure 1: Conceptual Framework

745 Figure 2: Search Flow Diagram

746 Figure 3: Barriers to optimal breastfeeding practices

747 Figure 4: Implementation Guidelines

748

**Figure 1: Conceptual Framework**

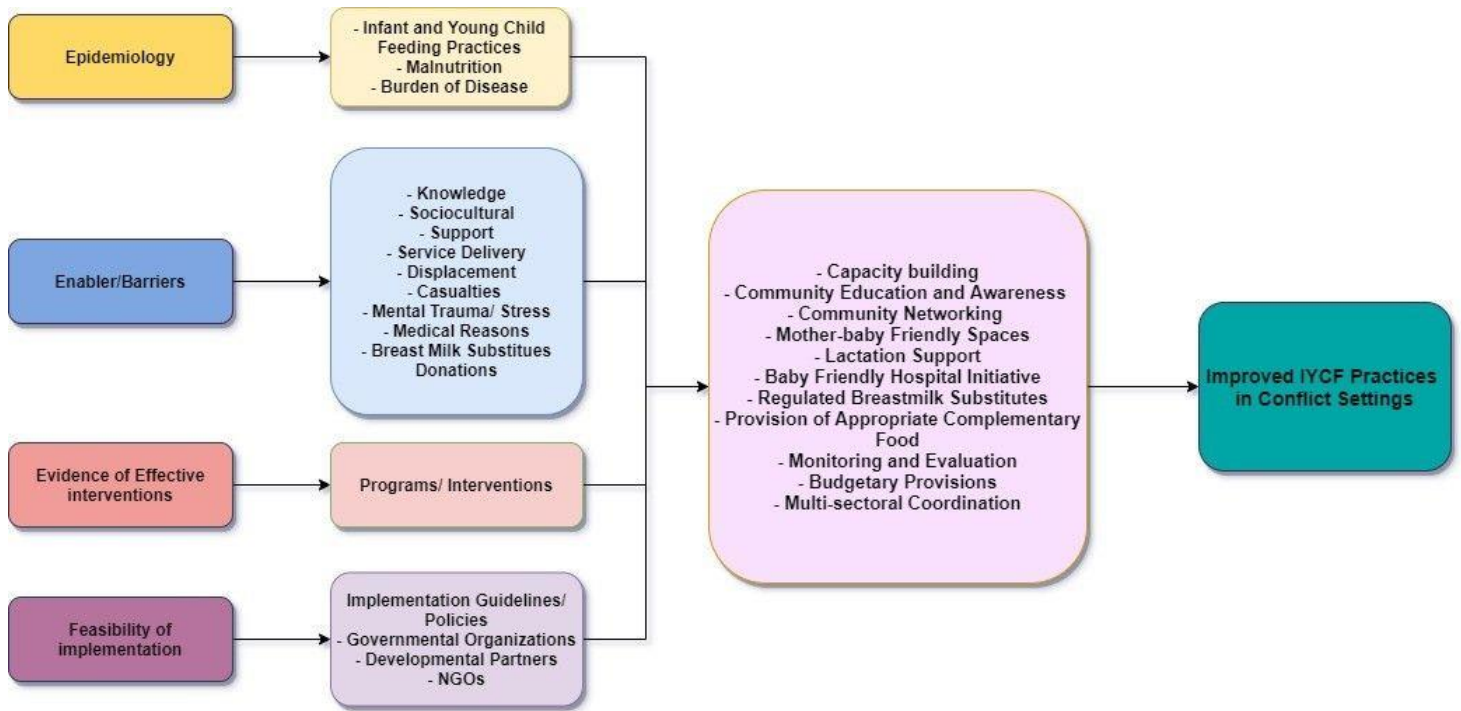

review only

**Figure 2: Search Flow Diagram**

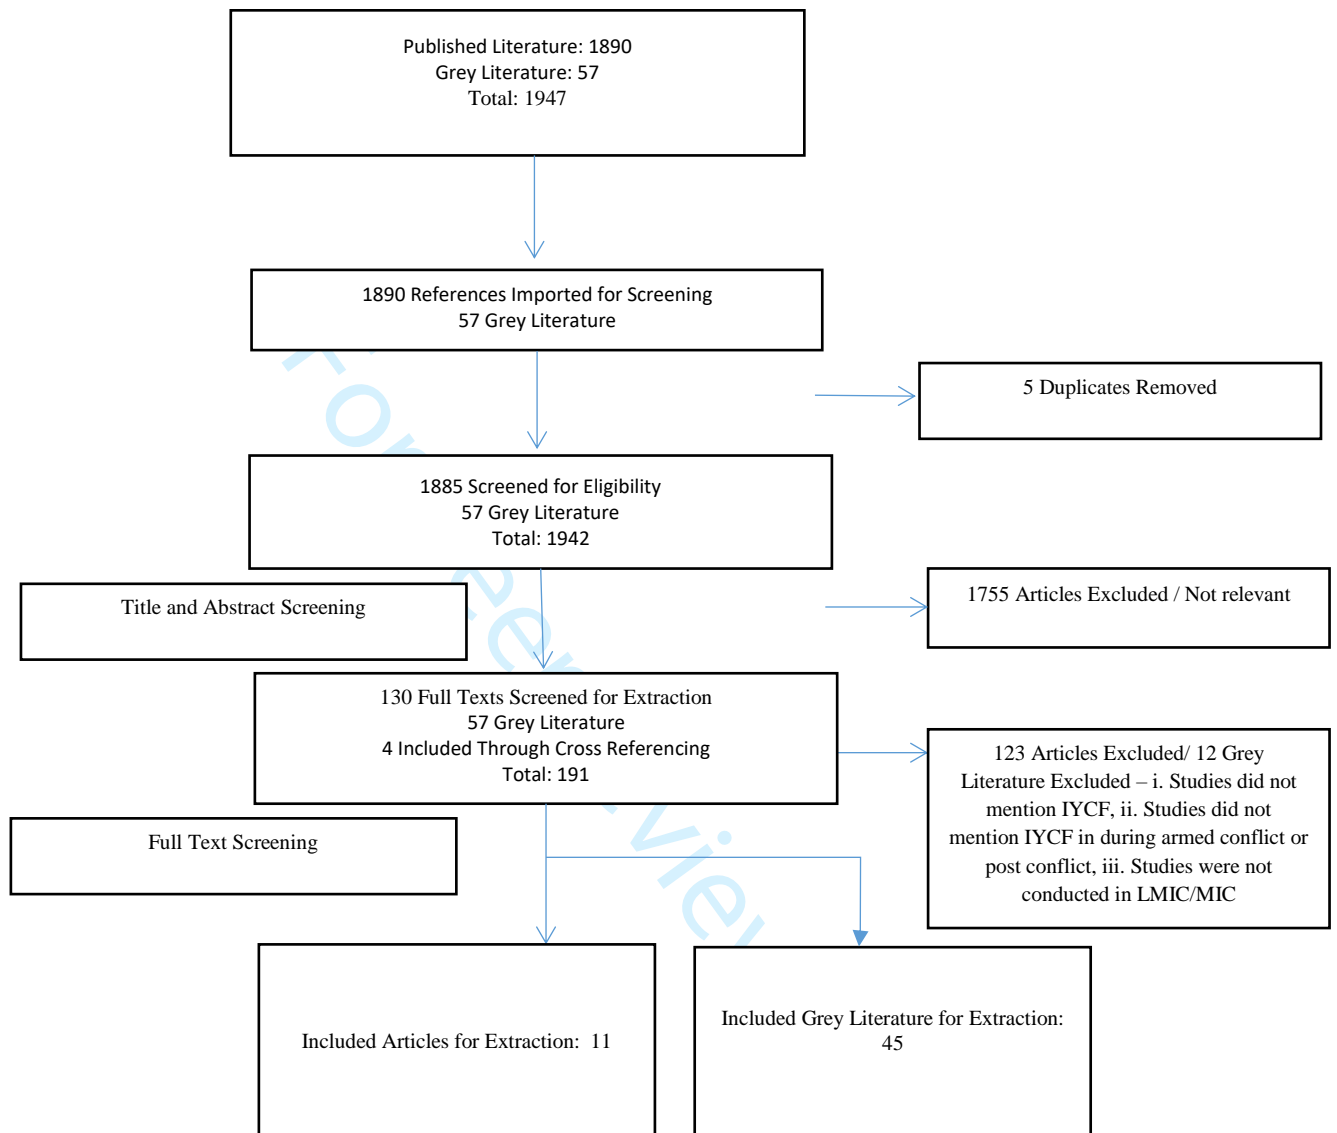

**Figure 3: Barriers to optimal breastfeeding practices**

1  
2  
3  
4  
5  
6  
7  
8  
9  
10  
11  
12  
13  
14  
15  
16  
17  
18  
19  
20  
21  
22  
23  
24  
25  
26  
27  
28  
29  
30  
31  
32  
33  
34  
35  
36  
37  
38  
39  
40  
41  
42  
43  
44  
45  
46  
47  
48  
49  
50  
51  
52  
53  
54  
55  
56  
57  
58  
59  
60

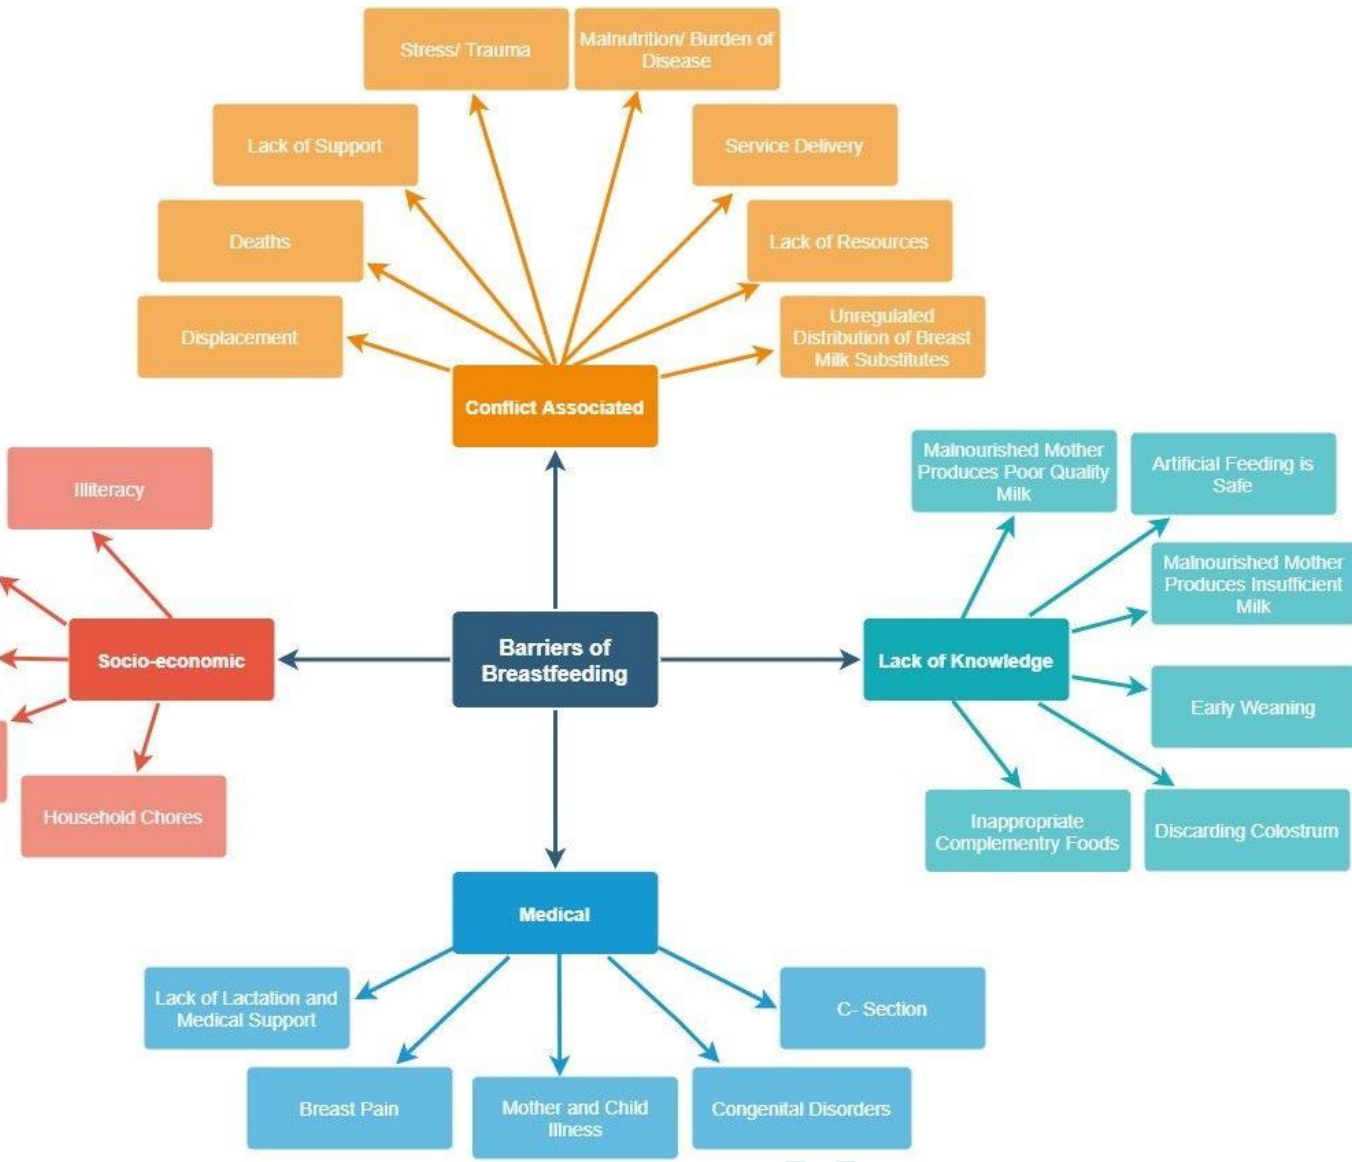



**Figure 4: Implementation Guidelines**

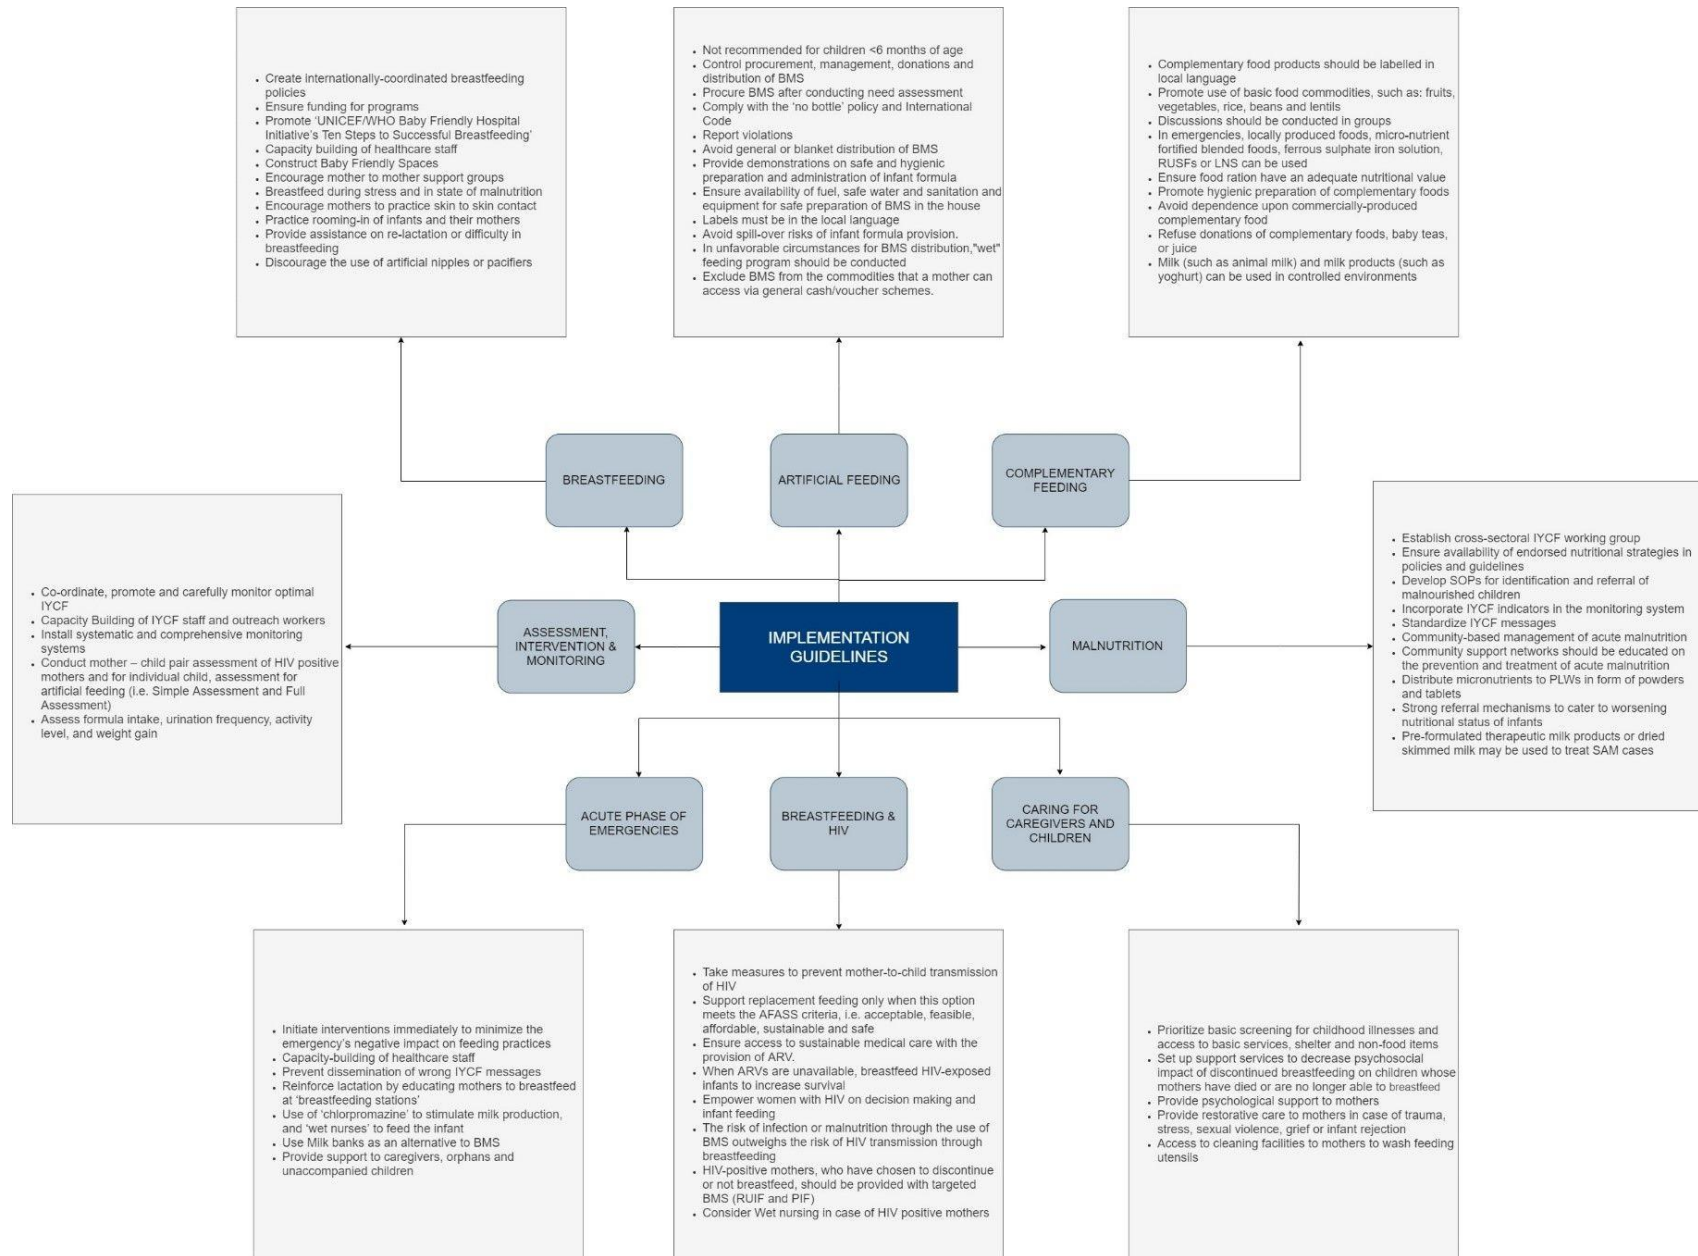



1  
2  
3  
4  
5  
6  
7  
8  
9  
10  
11  
12  
13  
14  
15  
16  
17  
18  
19  
20  
21  
22  
23  
24  
25  
26  
27  
28  
29  
30  
31  
32  
33  
34  
35  
36  
37  
38  
39  
40  
41  
42  
43  
44  
45  
46  
47  
48  
49  
50  
51  
52  
53  
54  
55  
56  
57  
58  
59  
60

For peer review only

## Appendix

Table 1: operational guidelines for IYCF in conflict

| Components of breastfeeding                                         | Operational Guidelines                                                                                                                                                                                                                                                                                                                                                                                                                                                                                                                                                                                                                                                                                                                                                                                                                                                                                                                                                                                                                                                                                                                                                                                                                                                                                                                                                                                                                                                                                                                                                                                                                                                                                                                                                                                                                                                                                                                                                                                                                                                                                                                                                                                                                                                                                                                                                                                                                                                                                                                                                                                                                                                                                                                                                                                                                                                                                                                                                                                                                                                                                                                                                                                                                                                                                                                                                                                                                                                                                                                                                                                                                                                                                                                                                |
|---------------------------------------------------------------------|-----------------------------------------------------------------------------------------------------------------------------------------------------------------------------------------------------------------------------------------------------------------------------------------------------------------------------------------------------------------------------------------------------------------------------------------------------------------------------------------------------------------------------------------------------------------------------------------------------------------------------------------------------------------------------------------------------------------------------------------------------------------------------------------------------------------------------------------------------------------------------------------------------------------------------------------------------------------------------------------------------------------------------------------------------------------------------------------------------------------------------------------------------------------------------------------------------------------------------------------------------------------------------------------------------------------------------------------------------------------------------------------------------------------------------------------------------------------------------------------------------------------------------------------------------------------------------------------------------------------------------------------------------------------------------------------------------------------------------------------------------------------------------------------------------------------------------------------------------------------------------------------------------------------------------------------------------------------------------------------------------------------------------------------------------------------------------------------------------------------------------------------------------------------------------------------------------------------------------------------------------------------------------------------------------------------------------------------------------------------------------------------------------------------------------------------------------------------------------------------------------------------------------------------------------------------------------------------------------------------------------------------------------------------------------------------------------------------------------------------------------------------------------------------------------------------------------------------------------------------------------------------------------------------------------------------------------------------------------------------------------------------------------------------------------------------------------------------------------------------------------------------------------------------------------------------------------------------------------------------------------------------------------------------------------------------------------------------------------------------------------------------------------------------------------------------------------------------------------------------------------------------------------------------------------------------------------------------------------------------------------------------------------------------------------------------------------------------------------------------------------------------------|
| <p><b>I. Protecting, promoting and supporting breastfeeding</b></p> | <ol style="list-style-type: none"> <li>1. Infants should be exclusively breast fed for the first 6 months of life, followed by appropriate complementary feeding along with continued breastfeeding for two<sup>1-14</sup></li> <li>2. Relief agencies should create internationally-coordinated breastfeeding policies with practical guidelines explicitly stated for field workers and decision<sup>2, 7, 10, 12, 13, 15, 16</sup></li> <li>3. National policies and technical guidelines on IYCF- E should be explicitly stated and communicated to relevant staff in order to increase preparedness if an emergency strikes. This is particularly important for high-risk countries<sup>2, 12, 13, 17, 18</sup></li> <li>4. Funding should be provided for programs to support breastfeeding<sup>2, 13, 19</sup></li> <li>5. It should be ensured that optimal breastfeeding practices and maternal care is promoted according to 'UNICEF/WHO Baby Friendly Hospital Initiative's Ten Steps to Successful Breastfeeding'<sup>2, 10, 20</sup></li> <li>6. Ensure that relief workers, healthcare staff, technical and non-technical personnel are trained in appropriate infant and young child feeding practices using available training material and key information on IYCF integrated into routine assessment<sup>2, 7, 10, 12-16, 20-23</sup></li> <li>7. Appropriate and timely support and trainings for breastfeeding and young child feeding should be integrated at all levels of healthcare<sup>2, 16, 21, 23</sup></li> <li>8. Efforts should be made to raise awareness supporting the superiority of breastfeeding as a life-saving intervention to health personnel, relief staff, NGOs, stakeholders and the general public focusing primarily on pregnant and breastfeeding women<sup>2, 10, 12, 20, 22, 24, 25</sup></li> <li>9. In conflict and refugee settings, traditional birth attendants (TBAs) are more accessible to mothers than nurses and midwives, therefore TBAs should be trained regarding appropriate breastfeeding practices<sup>17, 20, 24</sup></li> <li>10. Pregnant women and breastfeeding mothers should be informed using clear language about maternal health, how to properly breastfeed, advantages and maintenance of breastfeeding, negative effects of bottle-feeding and the difficulty to reverse decision not to breastfeed<sup>2, 6, 7, 10, 14, 17, 20, 22, 24, 25</sup></li> <li>11. Encourage mothers to initiate breastfeeding within the first hour of birth, and to exclusively breastfeed for the first six months of life (do not give them extra water, juices, tea or food) unless medically indicated otherwise. Thereafter, solid foods should be introduced, but breastfeeding should continue for at least a year or two<sup>2, 6, 7, 10, 11, 14, 15, 17, 26</sup></li> <li>12. Educate mothers to not stop breastfeeding in emergency situations and spread awareness that exclusive breastfeeding provides the best nutrition to babies. Moreover, breastmilk contains ingredients that protects babies from infection, so it's particularly useful in emergency situations<sup>2, 6, 10, 13, 15, 17</sup></li> <li>13. Encourage mothers to breastfeed on demand<sup>2, 7, 14, 17</sup></li> <li>14. Practice rooming-in of infants and their mothers (allow mothers and infants to remain together 24 hours a day) to support breastfeeding practice<sup>2, 7</sup></li> <li>15. Colostrum should be given to the baby to improve its physical growth and feeding baby should not be interrupted in between. The baby lets go off the breast when he/she is done<sup>10, 17, 26</sup></li> <li>16. Discourage the use of artificial nipples or pacifiers<sup>2, 7, 10, 24</sup></li> </ol> |

|                                                                                                                                                                                                                                                                                                                                                             |                                                                                                                                                                                                                                                                                                                                                                                                                                                                                                                                                                                                                                                                                                                                                                                                                                                                                                                                                                                                                                                                                                                                                                                                                                                                                                                                                                                                                                                                                                                                                                                                                                                                                                                                                                                                                                                                                                                                                                                                                                                                                                                                                                                                                                                                                                                                                                                                                                                                                                                                                                                                                                                                                                                                                                                                                                                                                                                                                                                                                                                                                                                                                                                                                                                                                                                                                                                                                                                                                                                                                                                                                                                                                                                                                                                                                                                                                                                                                                                                                                                                                                                                                                                                                                                                                                                                                                                                                                                                                                                                                                                                                                                                                                |
|-------------------------------------------------------------------------------------------------------------------------------------------------------------------------------------------------------------------------------------------------------------------------------------------------------------------------------------------------------------|------------------------------------------------------------------------------------------------------------------------------------------------------------------------------------------------------------------------------------------------------------------------------------------------------------------------------------------------------------------------------------------------------------------------------------------------------------------------------------------------------------------------------------------------------------------------------------------------------------------------------------------------------------------------------------------------------------------------------------------------------------------------------------------------------------------------------------------------------------------------------------------------------------------------------------------------------------------------------------------------------------------------------------------------------------------------------------------------------------------------------------------------------------------------------------------------------------------------------------------------------------------------------------------------------------------------------------------------------------------------------------------------------------------------------------------------------------------------------------------------------------------------------------------------------------------------------------------------------------------------------------------------------------------------------------------------------------------------------------------------------------------------------------------------------------------------------------------------------------------------------------------------------------------------------------------------------------------------------------------------------------------------------------------------------------------------------------------------------------------------------------------------------------------------------------------------------------------------------------------------------------------------------------------------------------------------------------------------------------------------------------------------------------------------------------------------------------------------------------------------------------------------------------------------------------------------------------------------------------------------------------------------------------------------------------------------------------------------------------------------------------------------------------------------------------------------------------------------------------------------------------------------------------------------------------------------------------------------------------------------------------------------------------------------------------------------------------------------------------------------------------------------------------------------------------------------------------------------------------------------------------------------------------------------------------------------------------------------------------------------------------------------------------------------------------------------------------------------------------------------------------------------------------------------------------------------------------------------------------------------------------------------------------------------------------------------------------------------------------------------------------------------------------------------------------------------------------------------------------------------------------------------------------------------------------------------------------------------------------------------------------------------------------------------------------------------------------------------------------------------------------------------------------------------------------------------------------------------------------------------------------------------------------------------------------------------------------------------------------------------------------------------------------------------------------------------------------------------------------------------------------------------------------------------------------------------------------------------------------------------------------------------------------------------------------------------|
| 1<br>2<br>3<br>4<br>5<br>6<br>7<br>8<br>9<br>10<br>11<br>12<br>13<br>14<br>15<br>16<br>17<br>18<br>19<br>20<br>21<br>22<br>23<br>24<br>25<br>26<br>27<br>28<br>29<br>30<br>31<br>32<br>33<br>34<br>35<br>36<br>37<br>38<br>39<br>40<br>41<br>42<br>43<br>44<br>45<br>46<br>47<br>48<br>49<br>50<br>51<br>52<br>53<br>54<br>55<br>56<br>57<br>58<br>59<br>60 | <p>17. Educate mothers on breastfeeding and the procedure to maintain lactation even when the mother-infant pair is temporarily separated<sup>2, 7, 10, 24</sup></p> <p>18. Ensure that mothers are facilitated by the provision of counseling and other forms of assistance for the purpose of re-lactation or difficulty in breastfeeding<sup>2, 6, 7, 10, 11, 14, 21, 23, 26, 27</sup></p> <p>19. Mothers should also be made aware that breast milk supply is not reduced by stress, though the release of milk could be affected<sup>6, 8, 10, 14, 18</sup></p> <p>20. Encourage mothers to practice skin to skin contact as this aids in reducing stress (cortisol) levels and helps the flow of mother's milk. This can be practiced using slings and wraps. Moreover, correct positioning of baby during breastfeeding is important as effective suckling also triggers breast milk production<sup>6, 10, 11, 14, 15, 17, 24, 26</sup></p> <p>21. Malnourished mothers can produce enough milk to breastfeed, however, she should be treated for malnourishment<sup>8, 10, 14, 15, 17, 26</sup></p> <p>22. Relief workers should provide nutritional support by giving a general ration to pregnant and lactating women. If full general ration is not possible, then food and micronutrient supplements should be sufficiently provided. This is because an optimally fed mother will be able to optimally feed her infant. Give adequate food to the malnourished mother to prevent depletion of her own nutrients and closely monitor the weight and urine production of the infant<sup>6, 10, 11, 15, 17, 18, 21, 23, 24, 26</sup></p> <p>23. In emergency settings, extra breastfeeding support should be provided by encouraging Baby Friendly Spaces, which provide a platform to support mothers/caregivers and promote appropriate infant and young children feeding practices, privacy and safety<sup>2, 11, 12, 15, 18, 21-24, 26</sup></p> <p>24. For refugees and displaced populations, establish rest areas for pregnant women/caregivers/mothers and children in transit. These should be secluded, private and culturally appropriate areas that assist women and children to relax and nurse<sup>2, 6, 11, 15, 18, 21, 23, 24</sup></p> <p>25. Establish a program to encourage mother to mother/ women to women support<sup>2, 6, 7, 20, 21, 23, 24</sup></p> <p>26. Establish registration of newborn infants, i.e. within two weeks of delivery, to ensure timely additional rations and breastfeeding support for lactating and breastfeeding mothers. Nutrition workers should help mothers to establish exclusive breastfeeding<sup>2, 6, 12, 16, 18, 23, 24</sup></p> <p>27. Vulnerable groups, especially newly arriving mothers and infants with severe feeding problems should be identified and referred for immediate assistance<sup>2, 6, 12, 15, 16, 18, 21, 23</sup></p> <p>28. Create referral and follow-up systems for mothers/caregivers and their infants<sup>2, 3, 6, 7</sup></p> <p>29. Avoid giving estrogen containing contraceptive pills to mothers because they decrease breastmilk production<sup>24</sup></p> <p>30. Encourage mothers to build their confidence which leads to production of oxytocin to improve blood flow<sup>26</sup></p> <p>31. Continue to breastfeed sick children or when they are less hungry. In case they are not hungry then put them to breast more repeatedly to ensure that they take enough breastmilk<sup>6, 10, 11, 14, 17, 26</sup></p> <p>32. When natural breastfeeding is not possible, available alternatives should be evaluated before an appropriate choice is made. This may include evaluating between: wet-nursing, the use of milk bank, home-modified milk and the use of locally purchased commercial infant formula or generic unbranded infant formula<sup>10, 12, 15, 23, 24, 28</sup></p> <p>33. Access to infant formula should be based on the guidelines set by the WHO International Code of Marketing of Breast Milk Substitutes, 1981<sup>10, 25</sup></p> <p>34. Support should be provided for artificial feeding and this should be distinct from the support being provided for breastfeeding<sup>1, 2, 4, 6, 10, 12, 19, 23</sup></p> <p>35. Lactating women can take most medicines (including antibiotics) and can be immunized as well, as recommended for adults and adolescents to protect against infectious diseases (measles, mumps, rubella, tetanus, diphtheria, pertussis, influenza, Streptococcus pneumoniae, Neisseria meningitidis, hepatitis A, hepatitis B, varicella, and inactivated polio)<sup>15</sup></p> <p>36. In case of radiation exposure</p> |
|-------------------------------------------------------------------------------------------------------------------------------------------------------------------------------------------------------------------------------------------------------------------------------------------------------------------------------------------------------------|------------------------------------------------------------------------------------------------------------------------------------------------------------------------------------------------------------------------------------------------------------------------------------------------------------------------------------------------------------------------------------------------------------------------------------------------------------------------------------------------------------------------------------------------------------------------------------------------------------------------------------------------------------------------------------------------------------------------------------------------------------------------------------------------------------------------------------------------------------------------------------------------------------------------------------------------------------------------------------------------------------------------------------------------------------------------------------------------------------------------------------------------------------------------------------------------------------------------------------------------------------------------------------------------------------------------------------------------------------------------------------------------------------------------------------------------------------------------------------------------------------------------------------------------------------------------------------------------------------------------------------------------------------------------------------------------------------------------------------------------------------------------------------------------------------------------------------------------------------------------------------------------------------------------------------------------------------------------------------------------------------------------------------------------------------------------------------------------------------------------------------------------------------------------------------------------------------------------------------------------------------------------------------------------------------------------------------------------------------------------------------------------------------------------------------------------------------------------------------------------------------------------------------------------------------------------------------------------------------------------------------------------------------------------------------------------------------------------------------------------------------------------------------------------------------------------------------------------------------------------------------------------------------------------------------------------------------------------------------------------------------------------------------------------------------------------------------------------------------------------------------------------------------------------------------------------------------------------------------------------------------------------------------------------------------------------------------------------------------------------------------------------------------------------------------------------------------------------------------------------------------------------------------------------------------------------------------------------------------------------------------------------------------------------------------------------------------------------------------------------------------------------------------------------------------------------------------------------------------------------------------------------------------------------------------------------------------------------------------------------------------------------------------------------------------------------------------------------------------------------------------------------------------------------------------------------------------------------------------------------------------------------------------------------------------------------------------------------------------------------------------------------------------------------------------------------------------------------------------------------------------------------------------------------------------------------------------------------------------------------------------------------------------------------------------------------|

|                                                                                                   |                                                                                                                                                                                                                                                                                                                                                                                                                                                                                                                                                                                                                                                                                                                                                                                                                                                                                                                                                                                                                                                                                                                                                                                                                                                                                                                                                                                                                                                                                                                                                                                                                                                                                                                                                                                                                                                                                                                                                                                                                                                                                                                                                                                                                                                                                                                                                                                                                                                                                                                                                                                                                                                                                                                                                                                                                                                                                                                                                                                                                                                                                                                                                                                                                                                                                                                                                                                                                                                                                                                                                                                                                                                                                                               |
|---------------------------------------------------------------------------------------------------|---------------------------------------------------------------------------------------------------------------------------------------------------------------------------------------------------------------------------------------------------------------------------------------------------------------------------------------------------------------------------------------------------------------------------------------------------------------------------------------------------------------------------------------------------------------------------------------------------------------------------------------------------------------------------------------------------------------------------------------------------------------------------------------------------------------------------------------------------------------------------------------------------------------------------------------------------------------------------------------------------------------------------------------------------------------------------------------------------------------------------------------------------------------------------------------------------------------------------------------------------------------------------------------------------------------------------------------------------------------------------------------------------------------------------------------------------------------------------------------------------------------------------------------------------------------------------------------------------------------------------------------------------------------------------------------------------------------------------------------------------------------------------------------------------------------------------------------------------------------------------------------------------------------------------------------------------------------------------------------------------------------------------------------------------------------------------------------------------------------------------------------------------------------------------------------------------------------------------------------------------------------------------------------------------------------------------------------------------------------------------------------------------------------------------------------------------------------------------------------------------------------------------------------------------------------------------------------------------------------------------------------------------------------------------------------------------------------------------------------------------------------------------------------------------------------------------------------------------------------------------------------------------------------------------------------------------------------------------------------------------------------------------------------------------------------------------------------------------------------------------------------------------------------------------------------------------------------------------------------------------------------------------------------------------------------------------------------------------------------------------------------------------------------------------------------------------------------------------------------------------------------------------------------------------------------------------------------------------------------------------------------------------------------------------------------------------------------|
|                                                                                                   | <p>a. Women who were exposed to radiation should be advised to temporarily stop breastfeeding unless there is no other source of feeding available for the infant. These mothers should pump and discard their milk until the infant can resume breastfeeding</p> <p>b. In case of interruption of breastfeeding, preferred source of infant feed is human milk that was pumped and stored prior to the radiation exposure or ready-to-feed infant formula. Mothers should use powdered or concentrated formula only if they are sure that water used to reconstitute is free from radiation</p> <p>c. Mothers can resume breastfeeding when advised by local health officials or when they have been evacuated from the radiation affected area</p> <p>d. Mothers do not need to stop breastfeeding if both mother and infant have been given appropriate doses of potassium iodide at the right time, according to the advice of local health officials<sup>15</sup></p>                                                                                                                                                                                                                                                                                                                                                                                                                                                                                                                                                                                                                                                                                                                                                                                                                                                                                                                                                                                                                                                                                                                                                                                                                                                                                                                                                                                                                                                                                                                                                                                                                                                                                                                                                                                                                                                                                                                                                                                                                                                                                                                                                                                                                                                                                                                                                                                                                                                                                                                                                                                                                                                                                                                                    |
| <p><b>II. Protecting non-breastfed infants and minimizing the risks of artificial feeding</b></p> | <ol style="list-style-type: none"> <li>1. Breast milk substitute (BMS) is not recommended for children &lt;6 months of age<sup>3, 4, 6, 7, 9, 10, 19, 21, 25, 28</sup></li> <li>2. Procurement, management and distribution of breastmilk substitutes, bottles and teats, and commercial complementary foods should be controlled during emergencies and should comply with the 'no bottle' policy and International Code and WHA guidelines and violations should be reported<sup>1-3, 10, 13, 16, 19, 21-23</sup></li> <li>3. Procure BMS after conducting need assessment of artificial feeding at population level assessment. It may also include nutrition survey, household and community survey. This is recommended to be done in close collaboration with government bodies and by developing Program Cooperation Agreements (PCAs) with local bodies for task implementation<sup>28</sup></li> <li>4. On distribution of BMS, it should be ensured that workforce involved should have enough capacity for assessment, counselling, supply chain management and in providing support to families on WASH and IYCF practices<sup>28</sup></li> <li>5. Donations of free or subsidized breast-milk substitutes, bottles and teats and commercial baby foods at emergency sites should be refused and advocated against as this could put infants lives at risk and undermine breastfeeding practices<sup>2-4, 6, 8, 11-13, 16, 21-23, 28</sup></li> <li>6. The distribution, use and quantity of breast milk substitutes should be controlled by collecting unsolicited donations from all ports of entry and the recipient agencies, and should be stored and managed centrally by a single designated agency<sup>1, 2, 4, 6, 10, 12, 13, 16, 19, 21, 23, 28</sup></li> <li>7. BMS should only be distributed to the infants who really need it and have no viable breastmilk options, based on established criteria (where distribution can be targeted, the supply chain is secure, and the conditions for safe preparation and use can be met). This should be determined by a qualified health or nutrition worker trained in breastfeeding and infant feeding issues<sup>1-4, 6, 7, 9-12, 14-16, 19, 21-23, 27</sup></li> <li>8. Breast-milk substitutes, milk products, bottles and teats should never be part of a general or blanket distribution and their use should be avoided, especially in case of emergency situations or in situations where hygienic conditions can't be ensured and their use should be discouraged. Bottles should be exchanged for cups instead as it's easier to keep them clean<sup>1-4, 6, 7, 10-12, 16, 18, 19, 21, 23, 24, 26-28</sup></li> <li>9. Promotion of breast-milk substitutes at the point of distribution should be strictly discouraged. There should be no advertisement or display of products or items with milk company logos and BMS supplies should not be used as a sales inducement and there should be no provision of single tins/samples of BMS or gifts to mothers. Moreover, no incentives should be offered by manufacturers to health workers to promote BMS products<sup>6, 9, 10, 21-23, 25, 28</sup></li> <li>10. In case of crisis, WHO developmental partners and/or the designated nutrition co-ordinating agency should train as well as support training of staff and mothers on the proper and safe use of infant formula<sup>2, 4, 10, 12, 16, 23</sup></li> <li>11. When the use of infant formula is indicated, before its distribution, mothers and caregivers responsible for feeding should be educated on the specific care needed by a non-breast fed infant, and given practical training and one-</li> </ol> |

|                                                                                                                                                                                                                                                                                                                                                                                                                                                                                                                                                                                                                |                                                                                                                                                                                                                                                                                                                                                                                                                                                                                                                                                                                                                                                                                                                                                                                                                                                                                                                                                                                                                                                                                                                                                                                                                                                                                                                                                                                                                                                                                                                                                                                                                                                                                                                                                                                                                                                                                                                                                                                                                                                                                                                                                                                                                                                                                                                                                                                                                                                                                                                                                                                                                                                                                                                                                                                                                                                                                                                                                                                                                                                                                                                                                                                                                                                                                                                                                                                                                                                                                                                                                                                                                                                                                                                                                                                                                                                                                                                                                                                                                                                                                                                                                                                                                                                                                                                                                                                                                                                                                                                                                                                                                                                                                                                                                                                        |
|----------------------------------------------------------------------------------------------------------------------------------------------------------------------------------------------------------------------------------------------------------------------------------------------------------------------------------------------------------------------------------------------------------------------------------------------------------------------------------------------------------------------------------------------------------------------------------------------------------------|----------------------------------------------------------------------------------------------------------------------------------------------------------------------------------------------------------------------------------------------------------------------------------------------------------------------------------------------------------------------------------------------------------------------------------------------------------------------------------------------------------------------------------------------------------------------------------------------------------------------------------------------------------------------------------------------------------------------------------------------------------------------------------------------------------------------------------------------------------------------------------------------------------------------------------------------------------------------------------------------------------------------------------------------------------------------------------------------------------------------------------------------------------------------------------------------------------------------------------------------------------------------------------------------------------------------------------------------------------------------------------------------------------------------------------------------------------------------------------------------------------------------------------------------------------------------------------------------------------------------------------------------------------------------------------------------------------------------------------------------------------------------------------------------------------------------------------------------------------------------------------------------------------------------------------------------------------------------------------------------------------------------------------------------------------------------------------------------------------------------------------------------------------------------------------------------------------------------------------------------------------------------------------------------------------------------------------------------------------------------------------------------------------------------------------------------------------------------------------------------------------------------------------------------------------------------------------------------------------------------------------------------------------------------------------------------------------------------------------------------------------------------------------------------------------------------------------------------------------------------------------------------------------------------------------------------------------------------------------------------------------------------------------------------------------------------------------------------------------------------------------------------------------------------------------------------------------------------------------------------------------------------------------------------------------------------------------------------------------------------------------------------------------------------------------------------------------------------------------------------------------------------------------------------------------------------------------------------------------------------------------------------------------------------------------------------------------------------------------------------------------------------------------------------------------------------------------------------------------------------------------------------------------------------------------------------------------------------------------------------------------------------------------------------------------------------------------------------------------------------------------------------------------------------------------------------------------------------------------------------------------------------------------------------------------------------------------------------------------------------------------------------------------------------------------------------------------------------------------------------------------------------------------------------------------------------------------------------------------------------------------------------------------------------------------------------------------------------------------------------------------------------------------------|
| <p>1</p> <p>2</p> <p>3</p> <p>4</p> <p>5</p> <p>6</p> <p>7</p> <p>8</p> <p>9</p> <p>10</p> <p>11</p> <p>12</p> <p>13</p> <p>14</p> <p>15</p> <p>16</p> <p>17</p> <p>18</p> <p>19</p> <p>20</p> <p>21</p> <p>22</p> <p>23</p> <p>24</p> <p>25</p> <p>26</p> <p>27</p> <p>28</p> <p>29</p> <p>30</p> <p>31</p> <p>32</p> <p>33</p> <p>34</p> <p>35</p> <p>36</p> <p>37</p> <p>38</p> <p>39</p> <p>40</p> <p>41</p> <p>42</p> <p>43</p> <p>44</p> <p>45</p> <p>46</p> <p>47</p> <p>48</p> <p>49</p> <p>50</p> <p>51</p> <p>52</p> <p>53</p> <p>54</p> <p>55</p> <p>56</p> <p>57</p> <p>58</p> <p>59</p> <p>60</p> | <p>on one demonstrations by a skilled health worker on safe and hygienic preparation and administration of infant formula<sup>1, 2, 4, 6, 7, 10, 12, 19, 21, 23</sup></p> <p>12. There should be regular follow-up visits, to caregivers of targeted infants receiving BMS comprising of regular infant health and growth monitoring and distribution of BMS should be frequent and regular (at least bimonthly), with minimum delays<sup>1, 3, 7, 10, 12, 19, 21</sup></p> <p>13. It should also be ensured that there is availability of fuel, safe water and sanitation and equipment for safe preparation of BMS in the house, prior to distribution of BMS and implementing a household based program<sup>2-4, 6, 7, 9-11, 14, 15, 21, 23, 25, 26, 28</sup></p> <p>14. For infants determined to be in need of infant formula, the adequate and continued provision of infant formula must continue for as long as they require it, even if it needs to be purchased. IYCF-E programs that include an infant formula provision component should plan to provide it for at least 6 months, or if there is no availability of adequate complementary food, then 12 months<sup>3, 4, 6, 7, 9-12, 14, 19, 22</sup></p> <p>15. Non-breastfed infants over 6 months of age, provided with 6 months of BMS, may require 2-4 weeks of buffer supply to offer transition to non BMS feeding<sup>3, 10</sup></p> <p>16. An improvement should be brought about in health services to manage the adverse effects of artificial feeding, especially the increase in incidence of severe diarrhea and respiratory infections in infants<sup>2, 10</sup></p> <p>17. Generic, unbranded formula is recommended for infants who require infant formula, followed by locally purchased and relabeled infant formula (to be in compliance with The International Code). Home modified milk should only be used temporarily as the last resort for infants less than 6 months old. The type of infant formula should have a shelf life of at least 6 months and be appropriate for the infant, including their age<sup>4, 6, 7, 9, 10, 15, 19, 21, 23</sup></p> <p>18. Labels must adhere to the specific labelling requirements of The International Code and should be in the language of the local population. The BMS packaging should have clear instructions, with pictures, on how to use it, along with clearly specifying the superiority of breast milk<sup>4, 6, 7, 9, 19, 21, 25, 28</sup></p> <p>19. The labels should include a sign of "Important Notice" stating importance of breastfeeding and a statement stating, "The product should be used only on the advice of a health worker as to the need for its use and the proper method of use." They instructions should also state about its safe preparation and health hazard on inappropriate use, and a warning against the health hazards on inappropriate preparation of infant formula<sup>28</sup></p> <p>20. Supply department should assure that BMS manufactured should follow Codex Alimentarius standards. UNICEF has not included BMS in its supply catalogue as a non-standard product<sup>28</sup></p> <p>21. For infants under 6 months of age, the only suitable BMS is infant formula. However, infants over the age of 6 months do not need infant formula but can use other sources of milk (pasteurized full-cream animal milk (cow, goat, sheep), Ultra High Temperature (UHT) milk, fermented milk or yogurt) as these are easier to find and are less dangerous than powdered milk. Condensed milk should not be used for infant feeding<sup>4, 6, 10</sup></p> <p>22. Liquid milk, if being used, should be consumed within a few hours of opening. Baby juices and teas should be avoided as they are low in nutrition and high in sugar. For infants over 6 months of age, infant formula can be mixed into the child's food instead of giving it to drink<sup>6</sup></p> <p>23. Milk products should only be received and distributed in a dry form and even dried milk products should be distributed only when pre-mixed with a milled staple food and should not be distributed as a single commodity. However, dried skim milk is not an appropriate BMS for infant, and even for older children it must be fortified with vitamin A and not given on its own<sup>4, 7, 9, 19, 23</sup></p> <p>24. It should be ensured that there are no spill-over risks of infant formula provision. Measures should be taken to reduce spill-over by ensuring that feeding BMS to a minority of children doesn't undermine breastfeeding practices of the majority. Advertising of infant formula should be stopped, and the provision of infant formula should be discrete, monetary support should be</p> |
|----------------------------------------------------------------------------------------------------------------------------------------------------------------------------------------------------------------------------------------------------------------------------------------------------------------------------------------------------------------------------------------------------------------------------------------------------------------------------------------------------------------------------------------------------------------------------------------------------------------|----------------------------------------------------------------------------------------------------------------------------------------------------------------------------------------------------------------------------------------------------------------------------------------------------------------------------------------------------------------------------------------------------------------------------------------------------------------------------------------------------------------------------------------------------------------------------------------------------------------------------------------------------------------------------------------------------------------------------------------------------------------------------------------------------------------------------------------------------------------------------------------------------------------------------------------------------------------------------------------------------------------------------------------------------------------------------------------------------------------------------------------------------------------------------------------------------------------------------------------------------------------------------------------------------------------------------------------------------------------------------------------------------------------------------------------------------------------------------------------------------------------------------------------------------------------------------------------------------------------------------------------------------------------------------------------------------------------------------------------------------------------------------------------------------------------------------------------------------------------------------------------------------------------------------------------------------------------------------------------------------------------------------------------------------------------------------------------------------------------------------------------------------------------------------------------------------------------------------------------------------------------------------------------------------------------------------------------------------------------------------------------------------------------------------------------------------------------------------------------------------------------------------------------------------------------------------------------------------------------------------------------------------------------------------------------------------------------------------------------------------------------------------------------------------------------------------------------------------------------------------------------------------------------------------------------------------------------------------------------------------------------------------------------------------------------------------------------------------------------------------------------------------------------------------------------------------------------------------------------------------------------------------------------------------------------------------------------------------------------------------------------------------------------------------------------------------------------------------------------------------------------------------------------------------------------------------------------------------------------------------------------------------------------------------------------------------------------------------------------------------------------------------------------------------------------------------------------------------------------------------------------------------------------------------------------------------------------------------------------------------------------------------------------------------------------------------------------------------------------------------------------------------------------------------------------------------------------------------------------------------------------------------------------------------------------------------------------------------------------------------------------------------------------------------------------------------------------------------------------------------------------------------------------------------------------------------------------------------------------------------------------------------------------------------------------------------------------------------------------------------------------------------------------|

|                                                                                                     |                                                                                                                                                                                                                                                                                                                                                                                                                                                                                                                                                                                                                                                                                                                                                                                                                                                                                                                                                                                                                                                                                                                                                                                                                                                                                                                                                                                                                                                                                                                                                                                                                                                                                                                                                                                                                                                                                                                                                                                                                                                                                                                                                                                                                                                                                                                                                                                                                                                                                                                                                                                                                                                                                                                                                                                                                                                                                                                                                                                                                                                                                                                            |
|-----------------------------------------------------------------------------------------------------|----------------------------------------------------------------------------------------------------------------------------------------------------------------------------------------------------------------------------------------------------------------------------------------------------------------------------------------------------------------------------------------------------------------------------------------------------------------------------------------------------------------------------------------------------------------------------------------------------------------------------------------------------------------------------------------------------------------------------------------------------------------------------------------------------------------------------------------------------------------------------------------------------------------------------------------------------------------------------------------------------------------------------------------------------------------------------------------------------------------------------------------------------------------------------------------------------------------------------------------------------------------------------------------------------------------------------------------------------------------------------------------------------------------------------------------------------------------------------------------------------------------------------------------------------------------------------------------------------------------------------------------------------------------------------------------------------------------------------------------------------------------------------------------------------------------------------------------------------------------------------------------------------------------------------------------------------------------------------------------------------------------------------------------------------------------------------------------------------------------------------------------------------------------------------------------------------------------------------------------------------------------------------------------------------------------------------------------------------------------------------------------------------------------------------------------------------------------------------------------------------------------------------------------------------------------------------------------------------------------------------------------------------------------------------------------------------------------------------------------------------------------------------------------------------------------------------------------------------------------------------------------------------------------------------------------------------------------------------------------------------------------------------------------------------------------------------------------------------------------------------|
|                                                                                                     | <p>provided to breastfeeding mothers, and a separate space dedicated for breastfeeding support and counseling<sup>1, 2, 4, 6, 10, 12, 19, 23</sup></p> <p>25. When circumstances are not favorable for BMS distribution (safe preparation and use of infant formula can't be ensured), an on-site supplementary "wet" feeding program should be conducted in closed spaces under supervision<sup>4, 7, 21, 23</sup></p> <p>26. Infant formula should not be excluded from the commodities that a mother can access via general cash/voucher schemes. However, it should be accompanied by interventions such as providing essential information on breastfeeding and on how to reduce the risks of formula feeding<sup>6</sup></p> <p>27. Breast milk donations should be authorized and be regulated by the Ministry of Health. Until the arrival of the beneficiary, cold chain should be maintained for donated frozen breast milk<sup>2, 26, 28</sup></p> <p>28. The psychosocial impact of discontinued breastfeeding on children whose mothers have died or are no longer able to breastfeed should also be considered and support services should be set up to address this<sup>12, 16</sup></p> <p>29. One guideline mentioned that it should be known and taken care of that transitioning out from an emergency IYCF-E program with an infant formula provision component requires a solid, long-term exit strategy with ties to both facility and community-based structures<sup>12</sup></p>                                                                                                                                                                                                                                                                                                                                                                                                                                                                                                                                                                                                                                                                                                                                                                                                                                                                                                                                                                                                                                                                                                                                                                                                                                                                                                                                                                                                                                                                                                                                                                                                                   |
| <p>III. Protecting, promoting and supporting appropriate, safe and timely complementary feeding</p> | <ol style="list-style-type: none"> <li>1. To promote growth and development of infants, encourage appropriate, timely and safe complementary feeding for infants (aged &gt; 6 months) and young children (aged between 12 to &lt; 24 months), along with continued breastfeeding<sup>1-7, 9, 11, 12, 14, 18, 23</sup></li> <li>2. Children over the age of 6 months of age should be given complementary foods (solid, semi-solid and soft foods) that are easy to eat and digest and nutritionally complement breast milk<sup>1, 2, 6, 18</sup></li> <li>3. Conduct discussion in groups on complementary feeding and weaning<sup>26</sup></li> <li>4. Promote the growth of locally produced food and encourage mothers/caregivers to use these locally-produced, inexpensive foods for complementary feeding. These include basic food commodities, such as: fruits, vegetables, rice, beans and lentils<sup>9, 12, 18, 23</sup></li> <li>5. Increase frequency and variety of complementary food with the growing age of child to meet his/her nutritional needs<sup>26</sup></li> <li>6. In emergencies, locally produced foods, micro-nutrient fortified blended foods, ferrous sulphate iron solution (iron drops), Ready-to-Use Supplementary Foods (RUSFs) or Lipid based Nutrient Supplements (LNS) can be used for complementary feeding depending on the nutritional situation<sup>12, 18, 23, 28</sup></li> <li>7. Special attention must be given to ensure that the food ration distributed for old infants and young children have an adequate nutritional value (food should be fortified with vitamins and minerals<sup>4, 6, 16, 20, 23</sup></li> <li>8. Establish services to extend nutritional support to vulnerable groups, such as: orphans and unaccompanied infants and young children<sup>2, 6, 12, 15, 16, 21, 23</sup></li> <li>9. Promote hygienic preparation of complementary foods by providing mothers/caregivers necessary information and support<sup>6, 23</sup></li> <li>10. In emergencies, special consideration should be made to mitigate the obstacles faced by mothers/caregivers in the preparation (cook, mash, etc.) of age-appropriate complementary foods. Measures needed to counter these obstacles should be incorporated in the program design<sup>6, 12, 18</sup></li> <li>11. IYCF-E programs relating to complementary feeding should include:       <ol style="list-style-type: none"> <li>a. Group sensitization and education</li> <li>b. Develop local food recipes focusing on nutritional value, affordability and food dietary diversity</li> <li>c. Provide cooking demonstrations, and</li> <li>d. Support mothers/caregivers to prepare complementary foods via initiatives such as fresh food vouchers<sup>12</sup></li> </ol> </li> <li>12. Dependence upon commercially-produced complementary foods should be avoided<sup>9, 23</sup></li> <li>13. Mothers should be assured that in the absence of safe complementary foods, breastmilk is a significant source of nutrition for infants the first year of life and beyond<sup>15</sup></li> </ol> |



|                                          |                                                                                                                                                                                                                                                                                                                                                                                                                                                                                                                                                                                                                                                                                                                                                                                                                                                                                                                                                                                                                                                                                                                                                                                                                                                                                                                                                                                                                                                                                                                                                                                                                                                                                                                                                                                                                                                                                                                                                                                                                                                                                                                                      |
|------------------------------------------|--------------------------------------------------------------------------------------------------------------------------------------------------------------------------------------------------------------------------------------------------------------------------------------------------------------------------------------------------------------------------------------------------------------------------------------------------------------------------------------------------------------------------------------------------------------------------------------------------------------------------------------------------------------------------------------------------------------------------------------------------------------------------------------------------------------------------------------------------------------------------------------------------------------------------------------------------------------------------------------------------------------------------------------------------------------------------------------------------------------------------------------------------------------------------------------------------------------------------------------------------------------------------------------------------------------------------------------------------------------------------------------------------------------------------------------------------------------------------------------------------------------------------------------------------------------------------------------------------------------------------------------------------------------------------------------------------------------------------------------------------------------------------------------------------------------------------------------------------------------------------------------------------------------------------------------------------------------------------------------------------------------------------------------------------------------------------------------------------------------------------------------|
|                                          | <ol style="list-style-type: none"> <li>14. Donations of complementary foods, baby teas, or juices should be refused. If there are donated supplies, they should be directed to the designated coordinating agency on nutrition/health to be managed appropriately<sup>6</sup></li> <li>15. Promotion of a varied diet, dairy products in particular, to ensure that energy, protein, mineral and vitamin requirements are met. Moreover, when preparing food for infants such as porridges, mashed potatoes, etc., milk and infant formula can be added to it to increase the nutrient content<sup>4, 6, 20, 26</sup></li> <li>16. Pastoral communities mainly use milk and milk products, which contains a significant amount of nutrition for children over six months. As a part of complementary feeding, milk (such as animal milk) and milk products (such as yoghurt) can be provided to infants over 6 months of age. In such cases, distribution of milk products can only be conducted in controlled environments under strict supervision, such as on-the-spot feeding<sup>3</sup></li> <li>17. Good nutrient sources for infants are animal source foods, such as yogurt and cheese whereas products containing only fruits/vegetables are less energy and nutrient dense. Baby teas and juices should not be given to infants as they do not have much nutrient value<sup>6</sup></li> <li>18. Complementary food products should be labelled in the language of the targeted population and be acceptable to them, according to their culture. The products should also have information on how to prepare the food<sup>6</sup></li> <li>19. Moreover, these products should not have images of bottle feeding on them or recommend it in any way<sup>6</sup></li> <li>20. If needed, commercial 'baby' foods should be purchased and distributed to mothers or products recommended to mothers, for infants over 6 months of age, that have the most nutritional value<sup>6</sup></li> <li>21. It is recommended that children over the age of 12 months eat the same foods as older children<sup>6</sup></li> </ol> |
| <p><b>IV. Caring for care-givers</b></p> | <ol style="list-style-type: none"> <li>1. Efforts should be made to increase caregivers' coping capacity because the number of caregivers is often reduced during emergencies and stress levels increase, so psychological support and encouragement plays an important role in enhancing optimal IYCF-E practices<sup>1, 2, 15, 17, 18</sup></li> <li>2. Treat the mother during illness, keep the infant close to the mother and do not stop breastfeeding. The mother should be educated on the appropriate method of milk expression as she can maintain breastmilk flow through milk expression<sup>17, 24</sup></li> <li>3. Breastfeeding mothers require identification, protection and active support. Conflict situations and displacement can negatively affect maternal confidence and breastfeeding practices. Breastfeeding mothers tend to stop or reduce breastfeeding in such situations and thus a lot of support and counselling should be provided to newly arriving refugee mothers, caregivers and infants with special needs (orphans and unaccompanied children)<sup>2, 5, 6, 12, 17, 18, 21, 23</sup></li> <li>4. Provide restorative care to mothers in case of trauma, stress, sexual violence, grief or infant rejection<sup>24</sup></li> <li>5. Adequately trained and skilled staff should support mothers with difficulties in breastfeeding their infants and provide private safe spaces for mothers to breastfeed and to connect with other mothers. Access to cleaning facilities should also be provided to mothers to wash feeding utensils, especially to mothers who are formula feeding. Prioritize mothers of infants and young children for basic screening of childhood illnesses, access to registration and basic services, shelter and non-food items<sup>2, 6, 10, 15, 18</sup></li> <li>6. It should be ensured that mothers/caregivers of artificially fed infants are given targeted support and receive counselling as well as kits for preparing BMS safely, including soap, fuel, water purification tablets<sup>2, 18</sup></li> </ol>                                         |
| <p><b>V. Protecting Children</b></p>     | <ol style="list-style-type: none"> <li>1. Artificially-fed infants need more protection and support than breast-fed children<sup>6, 10</sup></li> <li>2. Infants are at higher risk of malnutrition and illness like diarrhea and chest infections if they are being fed infant formula. In emergency conditions, this could be fatal<sup>2, 6, 10, 11</sup></li> <li>3. In case the infant is ill (e.g. if the infant has diarrhea), continue feeding the infant since breastmilk contains water to replace losses through diarrhea and important minerals and vitamins to help prevent dehydration. It also contains</li> </ol>                                                                                                                                                                                                                                                                                                                                                                                                                                                                                                                                                                                                                                                                                                                                                                                                                                                                                                                                                                                                                                                                                                                                                                                                                                                                                                                                                                                                                                                                                                    |



|                                |                                                                                                                                                                                                                                                                                                                                                                                                                                                                                                                                                                                                                                                                                                                                                                                                                                                                                                                                                                                                                                                                                                                                                                                                                                                                                                                                                                                                                                                                                                                                                                                                                                                                                                                                                                                                                                                                                                                                                                                                                                                                                                                                                                                                                                                                                                                                                                                                                                                                                                                                                                                                                                                                                                            |
|--------------------------------|------------------------------------------------------------------------------------------------------------------------------------------------------------------------------------------------------------------------------------------------------------------------------------------------------------------------------------------------------------------------------------------------------------------------------------------------------------------------------------------------------------------------------------------------------------------------------------------------------------------------------------------------------------------------------------------------------------------------------------------------------------------------------------------------------------------------------------------------------------------------------------------------------------------------------------------------------------------------------------------------------------------------------------------------------------------------------------------------------------------------------------------------------------------------------------------------------------------------------------------------------------------------------------------------------------------------------------------------------------------------------------------------------------------------------------------------------------------------------------------------------------------------------------------------------------------------------------------------------------------------------------------------------------------------------------------------------------------------------------------------------------------------------------------------------------------------------------------------------------------------------------------------------------------------------------------------------------------------------------------------------------------------------------------------------------------------------------------------------------------------------------------------------------------------------------------------------------------------------------------------------------------------------------------------------------------------------------------------------------------------------------------------------------------------------------------------------------------------------------------------------------------------------------------------------------------------------------------------------------------------------------------------------------------------------------------------------------|
|                                | <p>proteins to help strengthen the immune system of the baby. Give smaller amounts of breastfeed and more frequently if the infant's appetite is reduced. However, in serious or prolonged cases of diarrhea, rehydration therapy may be required<sup>6, 10, 11, 15, 26</sup></p> <ol style="list-style-type: none"> <li>4. Newborn infants are the most vulnerable group which should be targeted and ensured that they are exclusively breast fed and artificial feeding is prevented<sup>2, 6, 12, 16, 21, 23</sup></li> <li>5. Support breastfeeding as the best way to safeguard infants against cholera. Infants with cholera should continue breastfeeding as soon as they are able to suckle, and mothers with cholera should re-initiate breastfeeding as soon as they are stable<sup>12</sup></li> <li>6. Efforts should be made to protect cholera-free breast-fed babies from cross-contamination<sup>12</sup></li> <li>7. IYCF managers, field staff and registration staff should collaborate and ensure screening of infants at registration to identify and refer infants at risk or those who are highly vulnerable (i.e. orphans and unaccompanied infants and young children, non-breastfed infants &lt;6 months, ill infants or malnourished infants) and establish services to give these vulnerable infants nutritional support<sup>2, 6, 12, 16, 18, 21, 23</sup></li> <li>8. Prioritize support service:       <ol style="list-style-type: none"> <li>a. For re lactation: Prioritize non-breastfed infants 0 - &lt;6 months or of 0 - &lt;2 months whose mother/wet nurse is willing to re lactate</li> <li>b. Re-establish exclusive breastfeeding: Always prioritize infants aged 0 - &lt;2 months (including newborns). Infants 0 - &lt;4 months are a priority, but it's an ideal situation for infants 0 - &lt;6 months</li> <li>c. BMS provision and associated support services: prioritize not breastfed infants who are &lt;6 months<sup>3</sup></li> </ol> </li> <li>9. The psychosocial impact of discontinued breastfeeding on children whose mothers have died or are no longer able to breastfeed should also be considered and support services should be set up to address this<sup>12, 16</sup></li> <li>10. Consideration should also be given to special needs of artificially fed children (0-23 months) and PLW (i.e. insecticide treated mosquito nets; hygiene items including soap and washing containers; cooking and eating items; breastfeeding shawls; blankets and infant/young child clothing and shoes with thermal needs considered; potties, diapers), with a particular preference for items that can be locally sourced<sup>2</sup></li> </ol> |
| <p><b>VI. Malnutrition</b></p> | <ol style="list-style-type: none"> <li>1. Ensure availability of endorsed nutritional strategies in policies and guidelines and establish cross-sectoral IYCG working group to discuss challenges, needs and success<sup>2</sup></li> <li>2. IYCF teams should coordinate and generate a treatment plan where mothers should be admitted at stabilization centers along with her children where they would be provided with nutritional support and counselling to improve lactation<sup>2</sup></li> <li>3. Select an IYCF specialist from each nutrition post or community group<sup>2</sup></li> <li>4. Standardize IYCF messages for caregivers and PLWs with children of 0-23 months and incorporate IYCF indicators in the monitoring system<sup>2</sup></li> <li>5. Develop standard procedure for health workers for identification and referral of malnourished children<sup>2</sup></li> <li>6. Promote IYCF practices (i.e. early initiation, exclusive breastfeeding and complementary feeding)<sup>2</sup></li> <li>7. Timely introduction of complementary food in infants of 6-9 months<sup>2</sup></li> <li>8. Micronutrients should be distributed to all PLWs in form of powders and tablets<sup>2</sup></li> <li>9. Malnutrition treatment and prevention programs should incorporate and prioritize infant and young child feeding in their agenda<sup>2, 12</sup></li> <li>10. Efforts should be made to investigate the underlying cause of malnutrition and measures should be taken to correct it<sup>1, 2, 10</sup></li> <li>11. Monitor nutritional status of mothers, infants and young children with the purpose of identifying, assessing, preventing and treating malnourished children<sup>1, 2, 10</sup></li> <li>12. Strong referral mechanisms should be put in place for acute malnutrition to cater to worsening nutritional status of infants<sup>2, 12</sup></li> </ol>                                                                                                                                                                                                                                                                                                                                                                                                                                                                                                                                                                                                                                                                                                                                                                                              |

|                                                                                      |                                                                                                                                                                                                                                                                                                                                                                                                                                                                                                                                                                                                                                                                                                                                                                                                                                                                                                                                                                                                                                                                                                                                                                                                                                                                                                                                                                                                                                                                                                                                                                                                                                                                                                                                                                                                                                                                                                                                                                                                                                                                                                                                                                                                                                                                                                                                                                                                                                                                                                                                                                                                                                                                                                                                                                                                                                                                                                           |
|--------------------------------------------------------------------------------------|-----------------------------------------------------------------------------------------------------------------------------------------------------------------------------------------------------------------------------------------------------------------------------------------------------------------------------------------------------------------------------------------------------------------------------------------------------------------------------------------------------------------------------------------------------------------------------------------------------------------------------------------------------------------------------------------------------------------------------------------------------------------------------------------------------------------------------------------------------------------------------------------------------------------------------------------------------------------------------------------------------------------------------------------------------------------------------------------------------------------------------------------------------------------------------------------------------------------------------------------------------------------------------------------------------------------------------------------------------------------------------------------------------------------------------------------------------------------------------------------------------------------------------------------------------------------------------------------------------------------------------------------------------------------------------------------------------------------------------------------------------------------------------------------------------------------------------------------------------------------------------------------------------------------------------------------------------------------------------------------------------------------------------------------------------------------------------------------------------------------------------------------------------------------------------------------------------------------------------------------------------------------------------------------------------------------------------------------------------------------------------------------------------------------------------------------------------------------------------------------------------------------------------------------------------------------------------------------------------------------------------------------------------------------------------------------------------------------------------------------------------------------------------------------------------------------------------------------------------------------------------------------------------------|
|                                                                                      | <p>13. Admit malnourished children along with their mothers to a nutritional rehabilitation program<sup>12, 21, 24</sup></p> <p>14. There should be community-based management of acute malnutrition, if conditions are favorable. In disasters, supplementary feeding should be the primary strategy for prevention and treatment of moderate acute malnutrition (MAM). Depending on vulnerable population groups and malnutrition level/risk of an increase in acute malnutrition, supplementary feeding can be blanket or targeted<sup>2</sup></p> <p>15. Pre-formulated therapeutic milk products or dried skimmed milk (DSM) may be used to treat cases of severe acute malnutrition (SAM). However, attention must be given to ensure that supplementary food aid commodities are carefully regulated and distributed to only target vulnerable groups<sup>4, 9</sup></p> <p>16. Therapeutic milks are not appropriate for BMS use. Therapeutic milk like F75 and F100 should be used for the treatment of children with severe acute malnutrition (SAM). It can be given to infants less than 6 months. SAM children require appropriate treatment at right time with immediate referral<sup>28</sup></p> <p>17. Cash/voucher programmes (conditional) could be started that promote good nutrition outcomes i.e. preventing malnutrition. Unconditional cash programs should be promoted in case of food security and livelihood. But in this case optimal IYCF practices should be considered through an expert. Women should be educated and sensitized for appropriate use on food and nonfood items for children of 0-23 months<sup>2</sup></p> <p>18. Community support networks should be educated on the prevention and treatment of acute malnutrition<sup>2</sup></p>                                                                                                                                                                                                                                                                                                                                                                                                                                                                                                                                                                                                                                                                                                                                                                                                                                                                                                                                                                                                                                                                                                                    |
| <p><b>VII.</b> The acute phase of emergencies (prevention through interventions)</p> | <p>1. In case of an emergency, interventions should start immediately to minimize the emergency's negative impact on feeding practices and every agency should develop a policy on infant feeding in emergencies, focusing on supporting caregivers and nutritional needs children<sup>1, 2, 4, 23</sup></p> <p>2. An appropriate agency should be appointed and resourced at the start of an emergency to co-ordinate IYCF-E practices and ensure the implementation of policies and it should be conveyed to all agencies working in the area<sup>13</sup></p> <p>3. In emergencies, donations of BMS are not needed and may put endanger infant lives due to poor hygienic conditions<sup>2, 4, 10, 12, 13, 23</sup></p> <p>4. If emergencies occur in places where there was already high infant formula use, promotion of IYCF-E can be even more difficult and WHO, and its developmental partners, along with local authorities and/or the national Nutrition Cluster (if activated) should ensure that appropriate IYCF-E is adequately promoted, protected and supported<sup>2, 10, 12, 23</sup></p> <p>5. Interventions should be undertaken to increase the prevalence of appropriate IYCF-E practices such as culturally-appropriate behavior -change approaches, along with capacity-building, to increase the rate of exclusive breastfeeding<sup>12, 13, 23</sup></p> <p>6. A joint statement for protection and support of appropriate IYCF-E should be released and ensured that BMS donations and distributions are carefully monitored<sup>2, 4, 7, 12, 13, 23</sup></p> <p>7. WHO, its developmental partners, local governments and national Nutrition Cluster (if activated) should work on this and provide this information to all staff, potential donors (including governments and the military) and the media, and ensure that no wrong messages are being disseminated both in emergency preparedness and particularly during the early phase of an emergency response<sup>2, 4, 12, 13, 23</sup></p> <p>8. Breastfeeding and IYCF support should be a major component of all services for mothers, infants and children and measures should be put in place to ensure that their needs are met in the early stages of an emergency<sup>2, 4, 7, 16</sup></p> <p>9. Support should also be provided to caregivers and infants with special needs (orphans and unaccompanied children)<sup>2, 6, 12, 14-16, 21, 23</sup></p> <p>10. It should be ensured that artificial feeding is strictly restricted to the targeted group of infants that require it and mothers who need help with breastfeeding are provided lactation support by mobilizing 'local breastfeeding facilitators'<sup>7, 10</sup></p> <p>11. Lactation should be reinforced by educating mothers to breastfeed every 2-3 hours at 'breastfeeding stations' scattered across refugee sites<sup>7</sup></p> |

|                                                             |                                                                                                                                                                                                                                                                                                                                                                                                                                                                                                                                                                                                                                                                                                                                                                                                                                                                                                                                                                                                                                                                                                                                                                                                                                                                                                                                                                                                                                                                                                                                                                                                                                                                                                                                                                                                                                                                                                                                                                                                                                                                                                                                                                                                                                                                                                                                                                                                                                                                                                                                                                                                                                                                                                                                                                                                                                                                                                                                                                                                                                                                                                                                                                                                                                                                                                                                                                                                                                                                                                                                                                                                                                                                                                                                                                                                                                                                                                                                                                                                                                                                                                                                                                                                                                                            |
|-------------------------------------------------------------|------------------------------------------------------------------------------------------------------------------------------------------------------------------------------------------------------------------------------------------------------------------------------------------------------------------------------------------------------------------------------------------------------------------------------------------------------------------------------------------------------------------------------------------------------------------------------------------------------------------------------------------------------------------------------------------------------------------------------------------------------------------------------------------------------------------------------------------------------------------------------------------------------------------------------------------------------------------------------------------------------------------------------------------------------------------------------------------------------------------------------------------------------------------------------------------------------------------------------------------------------------------------------------------------------------------------------------------------------------------------------------------------------------------------------------------------------------------------------------------------------------------------------------------------------------------------------------------------------------------------------------------------------------------------------------------------------------------------------------------------------------------------------------------------------------------------------------------------------------------------------------------------------------------------------------------------------------------------------------------------------------------------------------------------------------------------------------------------------------------------------------------------------------------------------------------------------------------------------------------------------------------------------------------------------------------------------------------------------------------------------------------------------------------------------------------------------------------------------------------------------------------------------------------------------------------------------------------------------------------------------------------------------------------------------------------------------------------------------------------------------------------------------------------------------------------------------------------------------------------------------------------------------------------------------------------------------------------------------------------------------------------------------------------------------------------------------------------------------------------------------------------------------------------------------------------------------------------------------------------------------------------------------------------------------------------------------------------------------------------------------------------------------------------------------------------------------------------------------------------------------------------------------------------------------------------------------------------------------------------------------------------------------------------------------------------------------------------------------------------------------------------------------------------------------------------------------------------------------------------------------------------------------------------------------------------------------------------------------------------------------------------------------------------------------------------------------------------------------------------------------------------------------------------------------------------------------------------------------------------------------------|
|                                                             | <p>12. One guideline also suggested the use of 'chlorpromazine' to stimulate milk production, according to the protocol and also 'wet nurses' to feed the infant<sup>7</sup></p> <p>13. Milk banks can also be used as an alternative to BMS and also as a source of employment in emergency setting<sup>7, 10</sup></p>                                                                                                                                                                                                                                                                                                                                                                                                                                                                                                                                                                                                                                                                                                                                                                                                                                                                                                                                                                                                                                                                                                                                                                                                                                                                                                                                                                                                                                                                                                                                                                                                                                                                                                                                                                                                                                                                                                                                                                                                                                                                                                                                                                                                                                                                                                                                                                                                                                                                                                                                                                                                                                                                                                                                                                                                                                                                                                                                                                                                                                                                                                                                                                                                                                                                                                                                                                                                                                                                                                                                                                                                                                                                                                                                                                                                                                                                                                                                   |
| <p><b>VIII.</b> Assessment, intervention and monitoring</p> | <ol style="list-style-type: none"> <li>1. In emergencies, co-ordinate, promote and carefully monitor optimal feeding in infants and young children<sup>1, 2, 15, 23</sup></li> <li>2. There should be systematic and comprehensive monitoring systems to track all infant feeding products being distributed<sup>13</sup></li> <li>3. Conduct mother – child pair assessment of HIV positive mothers and for individual child, assessment for artificial feeding (i.e. Simple Assessment and Full Assessment)<sup>3, 24</sup></li> <li>4. In areas with high prevalence of HIV, the risk of infant getting HIV via breastfeeding should be weighed against the risk of facing infection and malnutrition as a consequence of not being breastfed<sup>1</sup></li> <li>5. The prevalence of HIV in the affected population, knowledge of HIV status, and availability of counselling and testing facilities should be assessed (including pre-emergency estimates) using secondary sources and relevant information from health information systems<sup>10</sup></li> <li>6. In emergencies, implement an IYCF-E program focusing on infant feeding provision, with robust mechanisms that estimate the number of children that don't have access to breast milk and then provide them with targeted supply of infant formula<sup>12</sup></li> <li>7. Monitor the nutritional status of infants and young children, particularly weight monitoring for those receiving formula feed and assess intake, urination frequency, activity level, whether infant is feeding vigorously and weight gain<sup>6, 10, 12, 15, 24, 26</sup></li> <li>8. Establish a strong referral system to treat acute malnutrition should the infant's nutritional status deteriorate<sup>2, 12</sup></li> <li>9. To monitor and to conduct rapid assessments, gather information and statistics regarding: demographic profile, morbidity, mortality, predominant feeding practice, reported feeding problems for infants and young children including problems related to breastfeeding and complementary feeding, pre-crisis approach to orphaned children, security risks and availability of conspicuous BMS products and bottles/ teats/ breast pumps<sup>7, 10, 21, 23</sup></li> <li>10. To monitor and assess, use qualitative methods to gather data regarding:       <ol style="list-style-type: none"> <li>a. Appropriate complementary foods in the general ration or targeted feeding programs</li> <li>b. Maternal and child health facilities including antenatal, delivery, postnatal and child care</li> <li>c. Capacity of potential support-givers including breastfeeding mothers, trained health workers, trained counselors and experienced women from the community</li> <li>d. Factors that may disturb breastfeeding practices</li> <li>e. Key decision-makers at household, community and local health facility level that may influence infant and young child feeding practices</li> <li>f. Cultural barriers affected practices of re-lactation, wet-nursing, etc.</li> <li>g. General health environment including: water and sanitation, housing, facilities of food preparation and cooking<sup>10, 21, 23, 28</sup></li> </ol> </li> <li>11. To monitor and assess, use quantitative methods to gather data regarding:       <ol style="list-style-type: none"> <li>a. Estimated number of unaccompanied and accompanied children under two years of age, pregnant and lactating women</li> <li>b. Statistics regarding morbidity, mortality, and levels of malnutrition</li> <li>c. Information concerning nutritional adequacy of food rations</li> <li>d. Pre-crisis and recent patterns in infant and young child feeding practices</li> <li>e. Availability and management of BMS in accordance to The International Code<sup>2, 10, 21, 23</sup></li> </ol> </li> <li>12. Governments should monitor and apply The International Code collaboratively with the assistance of International agencies such as WHO and UNICEF, NGO's, refugee camp staff, professional groups and customer organizations to ensure that manufacturers and distributors of BMS remain within the scope of the established Code<sup>2, 10, 25</sup></li> </ol> |

|                                                                |                                                                                                                                                                                                                                                                                                                                                                                                                                                                                                                                                                                                                                                                                                                                                                                                                                                                                                                                                                                                                                                                                                                                                                                                                                                                                                                                                                                                                                                                                                                                                                                                                                                                                                                                                                                                                                                                                                                                                                                                                                                                                                                                                                                                                                                                                                                                                                                                                                                                                                                                                                                                                                                                                                                                                                                                                                                                                                                                                                                                                                                                                                                                                                                                                                                                                                                                                                                                                                          |
|----------------------------------------------------------------|------------------------------------------------------------------------------------------------------------------------------------------------------------------------------------------------------------------------------------------------------------------------------------------------------------------------------------------------------------------------------------------------------------------------------------------------------------------------------------------------------------------------------------------------------------------------------------------------------------------------------------------------------------------------------------------------------------------------------------------------------------------------------------------------------------------------------------------------------------------------------------------------------------------------------------------------------------------------------------------------------------------------------------------------------------------------------------------------------------------------------------------------------------------------------------------------------------------------------------------------------------------------------------------------------------------------------------------------------------------------------------------------------------------------------------------------------------------------------------------------------------------------------------------------------------------------------------------------------------------------------------------------------------------------------------------------------------------------------------------------------------------------------------------------------------------------------------------------------------------------------------------------------------------------------------------------------------------------------------------------------------------------------------------------------------------------------------------------------------------------------------------------------------------------------------------------------------------------------------------------------------------------------------------------------------------------------------------------------------------------------------------------------------------------------------------------------------------------------------------------------------------------------------------------------------------------------------------------------------------------------------------------------------------------------------------------------------------------------------------------------------------------------------------------------------------------------------------------------------------------------------------------------------------------------------------------------------------------------------------------------------------------------------------------------------------------------------------------------------------------------------------------------------------------------------------------------------------------------------------------------------------------------------------------------------------------------------------------------------------------------------------------------------------------------------------|
|                                                                | <p>13. Manufacturers and distributors should monitor their market prices and the practices of their marketing personnel in accordance to The Code. Non-governmental organizations (NGO's) along with professional groups, institutions and concerned individuals should monitor and criticize manufacturers and distributors that don't follow the principles of The Code<sup>10, 25</sup></p> <p>14. Review and monitor the following:</p> <ol style="list-style-type: none"> <li>Advice and knowledge regarding breastfeeding and BMS usage</li> <li>Estimate the number of women breastfeeding, weaning and incorporating the use of BMS and bottle in the feed of their infant and young children</li> <li>Constraints associated with hygienic BMS preparation</li> <li>Availability and management of BMS<sup>4, 7, 10, 20, 21, 23, 25</sup></li> </ol> <p>15. Promote importance of breastfeeding and optimal hygiene practices especially handwashing before preparation of BMS. We should also dispel myths among mothers regarding breastfeeding<sup>28</sup></p> <p>16. Capacity Building of IYCF staff and outreach workers on nutrition (optimal IYCF practices, lifesaving IYCF practices, rapid IYCF assessment and detection of poor IYCF practices)<sup>2</sup></p>                                                                                                                                                                                                                                                                                                                                                                                                                                                                                                                                                                                                                                                                                                                                                                                                                                                                                                                                                                                                                                                                                                                                                                                                                                                                                                                                                                                                                                                                                                                                                                                                                                                                                                                                                                                                                                                                                                                                                                                                                                                                                                                                                     |
| <p><b>IX. Breastfeeding, HIV, and other considerations</b></p> | <ol style="list-style-type: none"> <li>Generate policies on empowering women with HIV on decision making and infant feeding<sup>8</sup></li> <li>IYCF staff should take appropriate measures to prevent mother-to-child transmission of HIV, as well as focus on improving child survival from HIV<sup>2</sup></li> <li>Promote the use of optimal infant and young child feeding guidelines when the HIV status of the mother is unknown or she is HIV negative<sup>2-4, 10, 23, 24, 29</sup></li> <li>In case of unavailability of HIV-testing, it is recommended to breastfeed the infant for six months, followed by adequate complementary feeding and continued breast feeding for two years<sup>24, 29</sup></li> <li>Mothers should know their HIV status and receive appropriate counselling. Those diagnosed as HIV positive should make an informed decision about feeding options by balancing the prevention of HIV transmission with the nutritional requirements of infants<sup>1, 2, 4, 8, 10, 12, 23, 24, 29</sup></li> <li>HIV positive mother should exclusively breastfeed her child for first 6 months of life unless replacement feeding is affordable, sustainable and safe for their infants. In case, replacement feeding is not acceptable, then complementary feeding with continued breastfeeding at 6 months is recommended, while mother and baby will be assessed regularly<sup>2, 10, 24</sup></li> <li>Supportive arrangements and personal attachment for HIV positive mothers helps to reduce isolation, build confidence, reduce conflicting messages, encourage age appropriate feeding, provide privacy and educate family members<sup>24</sup></li> <li>Ensure access to sustainable medical care for mothers with an HIV positive status by supporting the provision of ART and ARV. If due to emergencies, the supply of these medications is hindered then immediate action should be taken for its re-establishment<sup>12, 23, 24, 29</sup></li> <li>In circumstances during acute emergencies, when Antiretroviral Drug (ARVs) are unavailable, it is recommended to breastfeed HIV-exposed infants to increase his/her survival<sup>2, 3</sup></li> <li>In emergency contexts, HIV-positive mothers should be supported to initiate or continue exclusive breastfeeding/ continued breastfeeding with adequate complementary feeding depending upon the age of the infant. The risk of infection or malnutrition through the use of Breast Milk Substitutes (BMS) outweighs the risk of HIV transmission through breastfeeding<sup>2, 8, 12, 21, 23, 24</sup></li> <li>Support replacement feeding <i>only</i> when this option meets the AFASS criteria, i.e. acceptable, feasible, affordable, sustainable and safe<sup>3-5, 23, 24, 29</sup></li> <li>All HIV- positive mothers should receive full support and get regular follow ups<sup>2, 29</sup></li> <li>HIV-positive and caregivers of children born to HIV-positive mothers, who have chosen to discontinue or not breastfeed, should be provided with targeted, appropriate, breast milk substitutes (Ready to Use Formula (RUIF) and Powdered Infant Formula (PIF)<sup>2, 12</sup></li> <li>Promote and support specific counseling concerned with risks of mixed feeding and HIV transmission. Additionally, ensure the provision of Safe BMS kits, i.e. adapted to the type of BMS administered<sup>2, 12</sup></li> </ol> |

|  |                                                                                                                                                                                                                                                                                                                                                                                                                                                                                                                                                                                                                                                                                                                                                                                                                                           |
|--|-------------------------------------------------------------------------------------------------------------------------------------------------------------------------------------------------------------------------------------------------------------------------------------------------------------------------------------------------------------------------------------------------------------------------------------------------------------------------------------------------------------------------------------------------------------------------------------------------------------------------------------------------------------------------------------------------------------------------------------------------------------------------------------------------------------------------------------------|
|  | <p>15. Services and activities linked to the Prevention/Elimination of Mother-to-Child Transmission (E/PMTCT) should be provided routinely as a part of nutritional interventions<sup>2, 12</sup></p> <p>16. Measures taken by ICYF-E staff should be sensitive and should avoid actions that may exacerbate any HIV-related stigma<sup>2, 12</sup></p> <p>17. Wet nursing should also be considered in case of HIV positive mothers and for infants who have lost their mothers. It should be administered by any person (other than mother). The wet nurse should be counselled before and after wet nursing to prevent her from catching infection<sup>10, 12, 24, 29</sup></p> <p>18. WHO recommends flash heated breastmilk rather than boiling breast milk to prevent significant nutritional damage of breastmilk<sup>29</sup></p> |
|--|-------------------------------------------------------------------------------------------------------------------------------------------------------------------------------------------------------------------------------------------------------------------------------------------------------------------------------------------------------------------------------------------------------------------------------------------------------------------------------------------------------------------------------------------------------------------------------------------------------------------------------------------------------------------------------------------------------------------------------------------------------------------------------------------------------------------------------------------|

## References:

1. WHO. Guiding principles for feeding infants and young children during emergencies. 2004.
2. UNHCR, children St. Infant and Young Child Feeding in Refugee Situations: A Multi-Sectoral Framework for Action. 2018 May, 2018.
3. UNHCR. Infant and young child feeding practices Standard Operating Procedures for the Handling of Breastmilk Substitutes (BMS) in Refugee Situations for children 0-23 months. 2015 August 2015.
4. UNHCR. UNHCR Policy Related To The Acceptance, Distribution And Use Of Milk Products In Refugee Settings 2006.
5. Save the Children U, Food Security and Nutrition Network. ICFY-E Toolkit: Summary of Feeding the Non-breastfed child 6- 24 months of Age 2007.
6. Refugees UHCF. Interim Operational Considerations for the feeding support of Infants and Young Children under 2 years of age in refugee and migrant transit settings in Europe. 2015.
7. OXFAM. Feeding in Emergencies For Infants Under Six Months: Practical Guidelines 1996.
8. Machel G. Impact of Armed Conflict on Children. United Nations; 1996 26 August 1996.
9. Joint UNICEF U, WFP, WHO Statement Policy on infant feeding in the Balkan Region.
10. ENN. Infant Feeding in Emergencies: Policy, Strategy and Practice. 1999 May 1999.
11. Association ILC. Breastfeeding: A Vital Emergency Response. Are You Ready? . 2009. p. 2.
12. ACF-International. Infant and Young Child Feeding in Emergencies. 2015 December 2015.
13. Borrel A, Taylor A, McGrath M, Seal A, Hormann E, Phelps L, et al. From policy to practice: challenges in infant feeding in emergencies during the Balkan crisis. *Disasters*. 2001;25(2):149-63.
14. Program WIEPoB. Infant and Young Child Feeding in Emergency Situations. 2005.
15. Pediatrics AAO. Infant feeding in disasters and emergencies. 2015.
16. Save the Children U, Food Security and Nutrition Network. IYCF-E Toolkit: Summary of Operational Guidance on ICF-E Key Points and WHA Resolution. 2007.
17. UNHCR. HOW TO GUIDE reproductive health in refugee setting (Strengthening Safe Motherhood Services). 1999 November 1998.
18. Children St. Assessment of infant and young child feeding practices among refugees on Lesbos Island, Greece. 2016.
19. Focus I. The Code and infant feeding in emergencies. 2009 May 2009.
20. USAID TSG, International Medical Corps Camp-based Barrier Analysis of Early Initiation of Breastfeeding, Iron-rich Food Consumption, and Early Antenatal Care Seeking Behaviors of Syrian Refugees in Azraq Camp, Jordan. 2016.



- 1  
2  
3 21. WHO, UNICEF, LINKAGES, IBFAN, ENN. Infant feeding in emergencies Module 1 (for emergency  
4 relief staff). 2001 November 2001.  
5  
6 22. WHO. WHA RESOLUTION 47.5  
7  
8 Infant and young child nutrition. 1994.  
9  
10 23. Group IC. Infant and Young Child Feeding in Emergencies Operational Guidance for Emergency  
11 Relief Staff and Programme Managers  
12 2017 October 2017.  
13 24. ENN, IBFAN-GIFA, Fondation Terre des hommes, Action Contre la Faim, CARE USA, LINKAGES, et  
14 al. Infant feeding in emergencies Module 2 Version 1.1 (for health and nutrition workers in emergency  
15 situations). 2007.  
16 25. WHO. International Code of Marketing of Breast-milk Substitutes. Geneva; 1981.  
17 26. ACF-International. Baby friendly spaces  
18  
19 Holistic approach for Pregnant, Lactating Women and their very young children in Emergency. 2014  
20 December 2014.  
21 27. Action Against Hunger U. Infant Feeding and Weaning Report 2000.  
22 28. UNICEF. UNICEF Guidance on the provision and use of breastmilk substitutes in humanitarian  
23 settings. 2018 June 2018.  
24 29. UNHCR. Guidance on Infant feeding and HIV in the context of refugees and displaced  
25 populations. 2008 April 2008.  
26  
27  
28  
29  
30  
31  
32  
33  
34  
35  
36  
37  
38  
39  
40  
41  
42  
43  
44  
45  
46  
47  
48  
49  
50  
51  
52  
53  
54  
55  
56  
57  
58  
59  
60



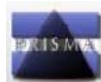

# PRISMA 2009 Checklist

| Section/topic                      | #  | Checklist item                                                                                                                                                                                                                                                                                              | Reported on page # |
|------------------------------------|----|-------------------------------------------------------------------------------------------------------------------------------------------------------------------------------------------------------------------------------------------------------------------------------------------------------------|--------------------|
| <b>TITLE</b>                       |    |                                                                                                                                                                                                                                                                                                             |                    |
| Title                              | 1  | Identify the report as a systematic review, meta-analysis, or both.                                                                                                                                                                                                                                         | 1                  |
| <b>ABSTRACT</b>                    |    |                                                                                                                                                                                                                                                                                                             |                    |
| Structured summary                 | 2  | Provide a structured summary including, as applicable: background; objectives; data sources; study eligibility criteria, participants, and interventions; study appraisal and synthesis methods; results; limitations; conclusions and implications of key findings; systematic review registration number. | 2                  |
| <b>INTRODUCTION</b>                |    |                                                                                                                                                                                                                                                                                                             |                    |
| Rationale                          | 3  | Describe the rationale for the review in the context of what is already known.                                                                                                                                                                                                                              | 4,5                |
| Objectives                         | 4  | Provide an explicit statement of questions being addressed with reference to participants, interventions, comparisons, outcomes, and study design (PICOS).                                                                                                                                                  | 4,5                |
| <b>METHODS</b>                     |    |                                                                                                                                                                                                                                                                                                             |                    |
| Protocol and registration          | 5  | Indicate if a review protocol exists, if and where it can be accessed (e.g., Web address), and, if available, provide registration information including registration number.                                                                                                                               |                    |
| Eligibility criteria               | 6  | Specify study characteristics (e.g., PICOS, length of follow-up) and report characteristics (e.g., years considered, language, publication status) used as criteria for eligibility, giving rationale.                                                                                                      | 5                  |
| Information sources                | 7  | Describe all information sources (e.g., databases with dates of coverage, contact with study authors to identify additional studies) in the search and date last searched.                                                                                                                                  | 6                  |
| Search                             | 8  | Present full electronic search strategy for at least one database, including any limits used, such that it could be repeated.                                                                                                                                                                               | 6                  |
| Study selection                    | 9  | State the process for selecting studies (i.e., screening, eligibility, included in systematic review, and, if applicable, included in the meta-analysis).                                                                                                                                                   | 6                  |
| Data collection process            | 10 | Describe method of data extraction from reports (e.g., piloted forms, independently, in duplicate) and any processes for obtaining and confirming data from investigators.                                                                                                                                  | 6                  |
| Data items                         | 11 | List and define all variables for which data were sought (e.g., PICOS, funding sources) and any assumptions and simplifications made.                                                                                                                                                                       | 6                  |
| Risk of bias in individual studies | 12 | Describe methods used for assessing risk of bias of individual studies (including specification of whether this was done at the study or outcome level), and how this information is to be used in any data synthesis.                                                                                      | NA                 |
| Summary measures                   | 13 | State the principal summary measures (e.g., risk ratio, difference in means).                                                                                                                                                                                                                               | NA                 |
| Synthesis of results               | 14 | Describe the methods of handling data and combining results of studies, if done, including measures of consistency (e.g., $I^2$ ) for each meta-analysis.                                                                                                                                                   | NA                 |

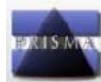

# PRISMA 2009 Checklist

Page 1 of 2

| Section/topic                 | #  | Checklist item                                                                                                                                                                                           | Reported on page # |
|-------------------------------|----|----------------------------------------------------------------------------------------------------------------------------------------------------------------------------------------------------------|--------------------|
| Risk of bias across studies   | 15 | Specify any assessment of risk of bias that may affect the cumulative evidence (e.g., publication bias, selective reporting within studies).                                                             | NA                 |
| Additional analyses           | 16 | Describe methods of additional analyses (e.g., sensitivity or subgroup analyses, meta-regression), if done, indicating which were pre-specified.                                                         | NA                 |
| <b>RESULTS</b>                |    |                                                                                                                                                                                                          |                    |
| Study selection               | 17 | Give numbers of studies screened, assessed for eligibility, and included in the review, with reasons for exclusions at each stage, ideally with a flow diagram.                                          | 7                  |
| Study characteristics         | 18 | For each study, present characteristics for which data were extracted (e.g., study size, PICOS, follow-up period) and provide the citations.                                                             | 7                  |
| Risk of bias within studies   | 19 | Present data on risk of bias of each study and, if available, any outcome level assessment (see item 12).                                                                                                | NA                 |
| Results of individual studies | 20 | For all outcomes considered (benefits or harms), present, for each study: (a) simple summary data for each intervention group (b) effect estimates and confidence intervals, ideally with a forest plot. | NA                 |
| Synthesis of results          | 21 | Present results of each meta-analysis done, including confidence intervals and measures of consistency.                                                                                                  | NA                 |
| Risk of bias across studies   | 22 | Present results of any assessment of risk of bias across studies (see Item 15).                                                                                                                          | N/A                |
| Additional analysis           | 23 | Give results of additional analyses, if done (e.g., sensitivity or subgroup analyses, meta-regression [see Item 16]).                                                                                    | NA                 |
| <b>DISCUSSION</b>             |    |                                                                                                                                                                                                          |                    |
| Summary of evidence           | 24 | Summarize the main findings including the strength of evidence for each main outcome; consider their relevance to key groups (e.g., healthcare providers, users, and policy makers).                     | 16                 |
| Limitations                   | 25 | Discuss limitations at study and outcome level (e.g., risk of bias), and at review-level (e.g., incomplete retrieval of identified research, reporting bias).                                            | 18                 |
| Conclusions                   | 26 | Provide a general interpretation of the results in the context of other evidence, and implications for future research.                                                                                  | 18                 |
| <b>FUNDING</b>                |    |                                                                                                                                                                                                          |                    |
| Funding                       | 27 | Describe sources of funding for the systematic review and other support (e.g., supply of data); role of funders for the systematic review.                                                               | 21                 |

From: Moher D, Liberati A, Tetzlaff J, Altman DG, The PRISMA Group (2009). Preferred Reporting Items for Systematic Reviews and Meta-Analyses: The PRISMA Statement. PLoS Med 6(7): e1000097. doi:10.1371/journal.pmed1000097

For more information, visit: [www.prisma-statement.org](http://www.prisma-statement.org).

Page 2 of 2

For peer review only - <http://bmjopen.bmj.com/site/about/guidelines.xhtml>
